# Supplementary material for: Iron/acetic acid mediated synthesis of 6,7-dihydrodibenzo[b,j][1,7]phenanthroline derivatives via intramolecular reductive cyclization
Source: Royal Society of Chemistry journal article supplement (doi:10.1039/c5ra06395g), 2015-01-01

**Iron/acetic acid mediated synthesis of 6,7-dihydrodibenzo [b,j] [1,7] phenanthroline derivatives *via* intramolecular reductive cyclization**

**R. R. Rajawinslin, Sachin S. Ichake, Veerababurao Kavala, Sachin D. Gawande, Yi-Hsiang Huang, Chun-Wei Kuo, and Ching-Fa Yao\***

*Department of Chemistry, National Taiwan Normal University, 88, Sec. 4, Tingchow Road,*

*Taipei, Taiwan 116, R.O.C.*

[cheyaocf@ntnu.edu.tw](mailto:cheyaocf@ntnu.edu.tw)

**Table of Contents**

|                                                                   |             |
|-------------------------------------------------------------------|-------------|
| <b>1. X-ray Crystallographic Structures</b>                       | <b>2-5</b>  |
| <b>2. <sup>1</sup>H and <sup>13</sup>C NMR &amp; HRMS Spectra</b> | <b>6-61</b> |

# 1. Crystal structure of compound **1a** (CCDC No: 1050602 )

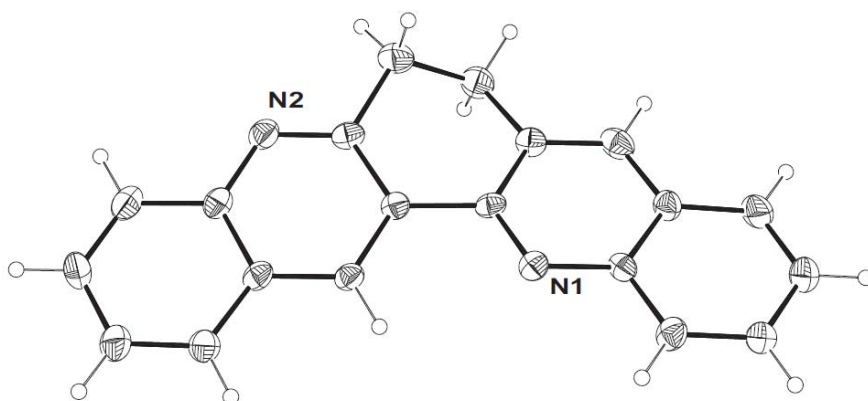

|                                 |                                                                                                  |
|---------------------------------|--------------------------------------------------------------------------------------------------|
| Identification code             | ch16265                                                                                          |
| Empirical formula               | C <sub>20</sub> H <sub>14</sub> N <sub>2</sub>                                                   |
| Formula weight                  | 282.33                                                                                           |
| Temperature                     | 200(2) K                                                                                         |
| Wavelength                      | 0.71073 Å                                                                                        |
| Crystal system                  | Orthorhombic                                                                                     |
| Space group                     | P 21 21 21                                                                                       |
| Unit cell dimensions            | a = 4.5670(10) Å      α = 90°.<br>b = 11.716(3) Å      β = 90°.<br>c = 26.496(7) Å      γ = 90°. |
| Volume                          | 1417.7(6) Å <sup>3</sup>                                                                         |
| Z                               | 4                                                                                                |
| Density (calculated)            | 1.323 Mg/m <sup>3</sup>                                                                          |
| Absorption coefficient          | 0.078 mm <sup>-1</sup>                                                                           |
| F(000)                          | 592                                                                                              |
| Crystal size                    | 0.66 x 0.08 x 0.03 mm <sup>3</sup>                                                               |
| Theta range for data collection | 1.54 to 25.03°.                                                                                  |

|                                   |                                             |
|-----------------------------------|---------------------------------------------|
| Index ranges                      | -2<=h<=5, -13<=k<=13, -31<=l<=31            |
| Reflections collected             | 8126                                        |
| Independent reflections           | 2515 [R(int) = 0.0965]                      |
| Completeness to theta = 25.03°    | 99.9 %                                      |
| Absorption correction             | multi-scan                                  |
| Max. and min. transmission        | 0.9977 and 0.9501                           |
| Refinement method                 | Full-matrix least-squares on F <sup>2</sup> |
| Data / restraints / parameters    | 2515 / 0 / 199                              |
| Goodness-of-fit on F <sup>2</sup> | 1.029                                       |
| Final R indices [I>2sigma(I)]     | R1 = 0.0701, wR2 = 0.1596                   |
| R indices (all data)              | R1 = 0.1344, wR2 = 0.2262                   |
| Absolute structure parameter      | -1(9)                                       |
| Largest diff. peak and hole       | 0.345 and -0.461 e.Å <sup>-3</sup>          |

1. Crystal structure of compound **5f** (CCDC No:1052475)

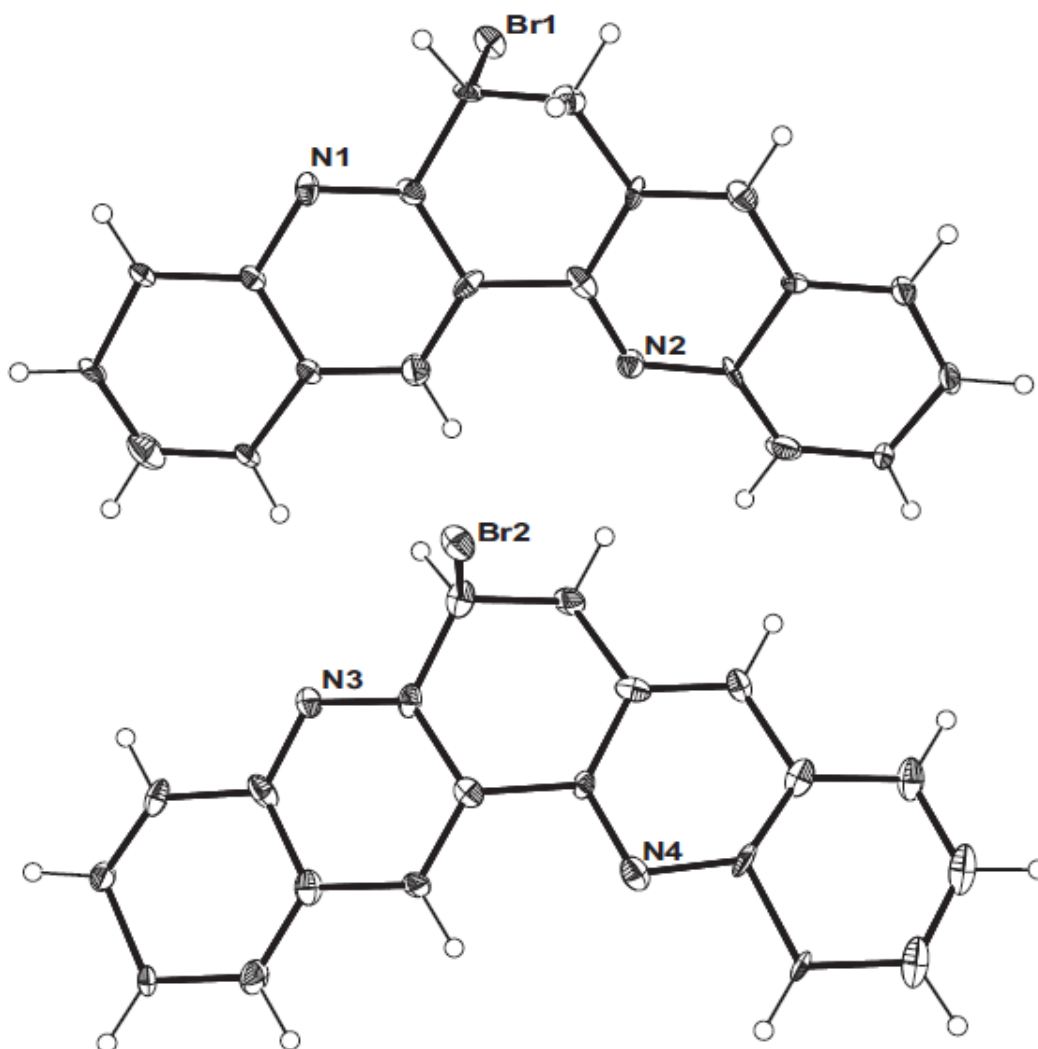

|                      |                                                   |
|----------------------|---------------------------------------------------|
| Identification code  | a16933                                            |
| Empirical formula    | C <sub>20</sub> H <sub>13</sub> Br N <sub>2</sub> |
| Formula weight       | 361.23                                            |
| Temperature          | 200(2) K                                          |
| Wavelength           | 0.71073 Å                                         |
| Crystal system       | Monoclinic                                        |
| Space group          | P n                                               |
| Unit cell dimensions | a = 6.4502(5) Å      α = 90°.                     |

|                                       |                                                            |                           |
|---------------------------------------|------------------------------------------------------------|---------------------------|
|                                       | $b = 10.8097(8) \text{ \AA}$                               | $\beta = 95.457(4)^\circ$ |
|                                       | $c = 22.0781(17) \text{ \AA}$                              | $\gamma = 90^\circ$       |
| Volume                                | $1532.4(2) \text{ \AA}^3$                                  |                           |
| Z                                     | 4                                                          |                           |
| Density (calculated)                  | $1.566 \text{ Mg/m}^3$                                     |                           |
| Absorption coefficient                | $2.683 \text{ mm}^{-1}$                                    |                           |
| F(000)                                | 728                                                        |                           |
| Crystal size                          | $0.23 \times 0.08 \times 0.03 \text{ mm}^3$                |                           |
| Theta range for data collection       | $1.85 \text{ to } 25.18^\circ$                             |                           |
| Index ranges                          | $-7 \leq h \leq 6, -12 \leq k \leq 12, -23 \leq l \leq 26$ |                           |
| Reflections collected                 | 6473                                                       |                           |
| Independent reflections               | 3831 [R(int) = 0.0456]                                     |                           |
| Completeness to theta = $25.18^\circ$ | 99.0 %                                                     |                           |
| Absorption correction                 | multi-scan                                                 |                           |
| Max. and min. transmission            | 0.9239 and 0.5774                                          |                           |
| Refinement method                     | Full-matrix least-squares on $F^2$                         |                           |
| Data / restraints / parameters        | 3831 / 2 / 391                                             |                           |
| Goodness-of-fit on $F^2$              | 1.024                                                      |                           |
| Final R indices [I > 2sigma(I)]       | R1 = 0.0747, wR2 = 0.1724                                  |                           |
| R indices (all data)                  | R1 = 0.0901, wR2 = 0.1856                                  |                           |
| Absolute structure parameter          | 0.19(3)                                                    |                           |
| Largest diff. peak and hole           | 5.225 and $-0.714 \text{ e.\AA}^{-3}$                      |                           |

**1. 6,7-dihydrodibenzo[b,j][1,7]phenanthroline (4a) :  $^1\text{H}$  NMR (400 MHz,  $\text{CDCl}_3$ )**

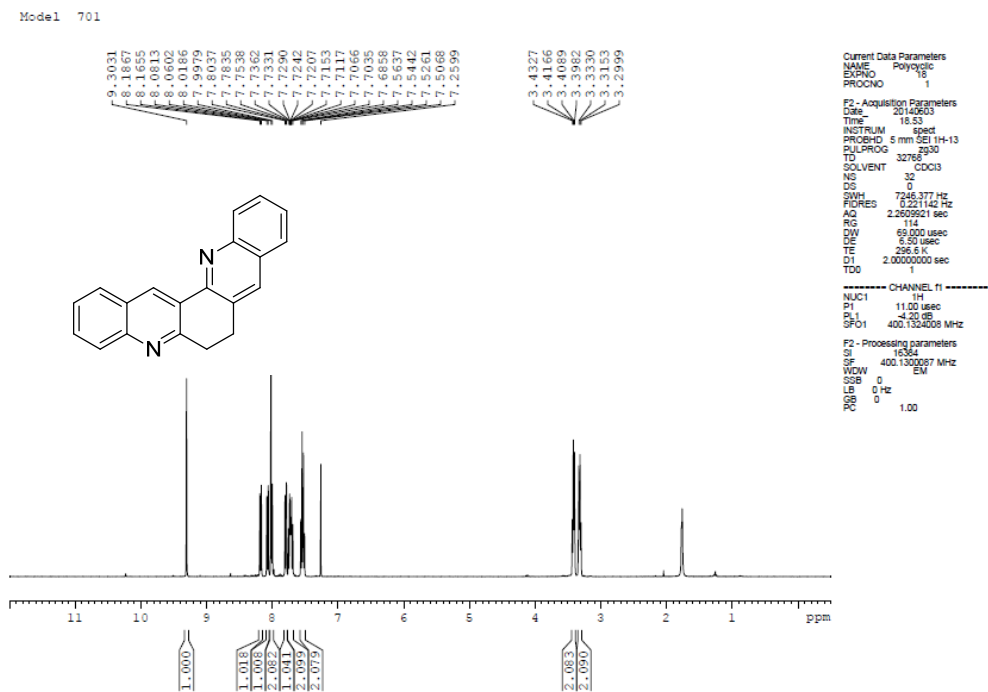

**6,7-dihydrodibenzo[b,j][1,7]phenanthroline (4a) :  $^{13}\text{C}$  NMR (100 MHz,  $\text{CDCl}_3$ )**

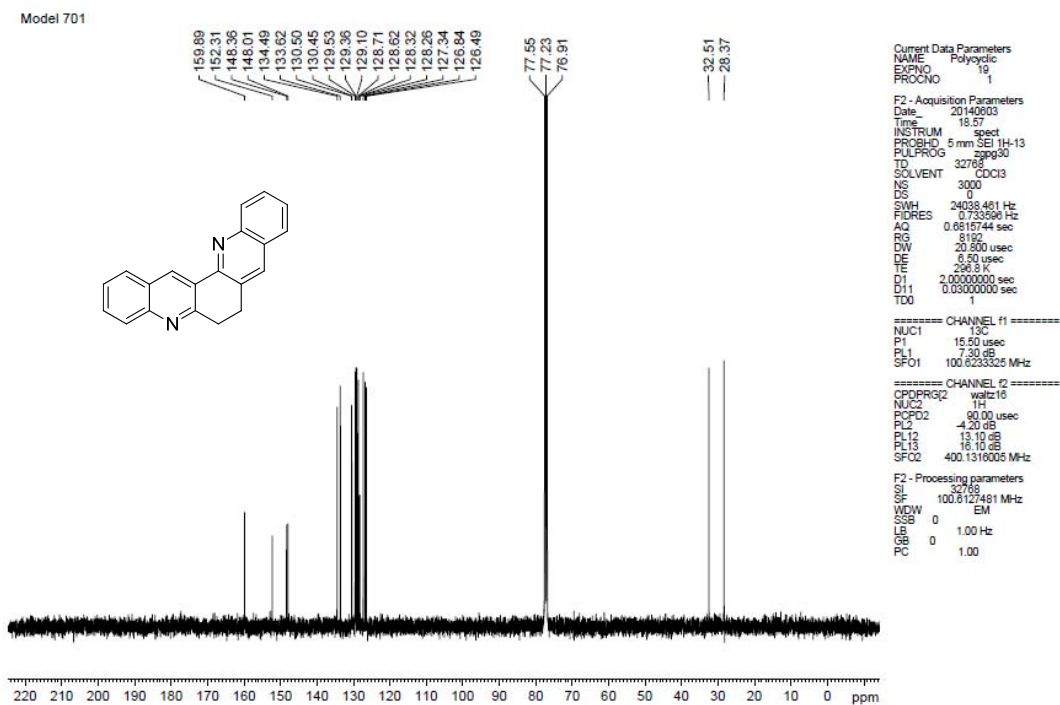

## 6,7-dihydrodibenzo[b,j][1,7]phenanthroline (4a) : HRMS

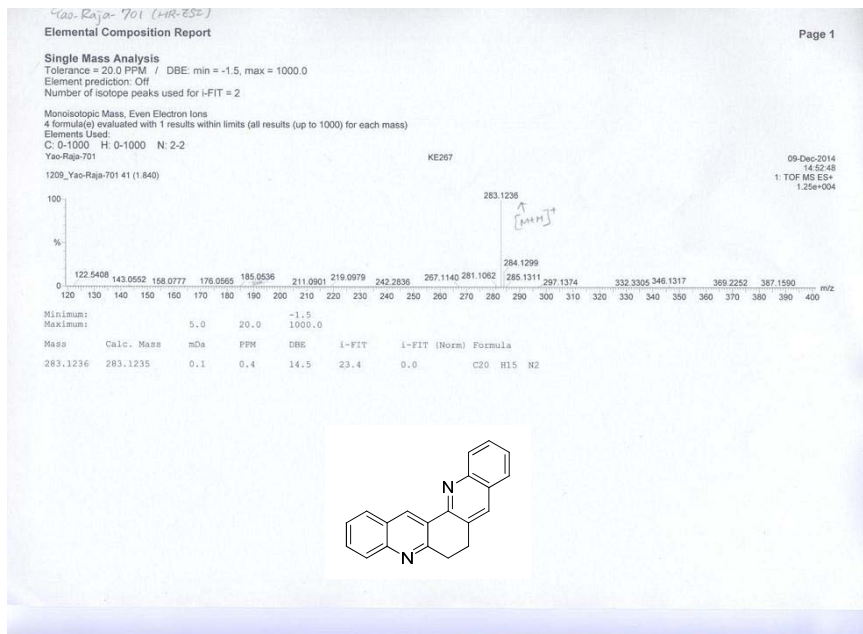

## 2. 10-fluoro-6,7-dihydrodibenzo[b,j][1,7]phenanthroline (4b) : <sup>1</sup>H NMR (400 MHz, CDCl<sub>3</sub>)

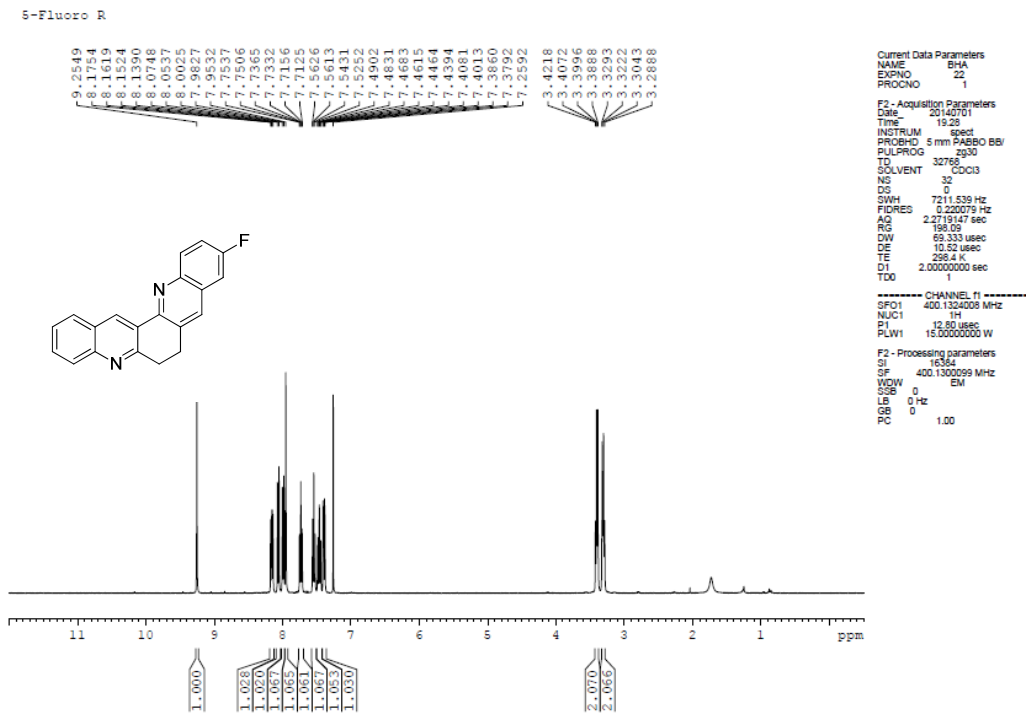

**10-fluoro-6,7-dihydrodibenzo[b,j][1,7]phenanthroline (4b) :  $^{13}\text{C}$  NMR (100 MHz,  $\text{CDCl}_3$ )**

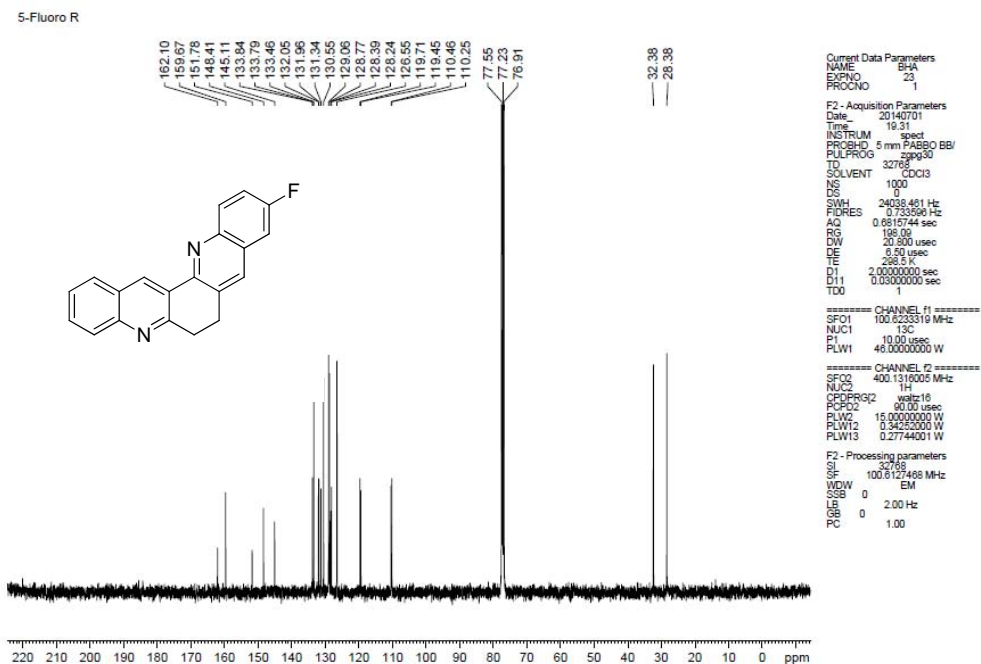

**10-fluoro-6,7-dihydrodibenzo[b,j][1,7]phenanthroline (4b) : HRMS**

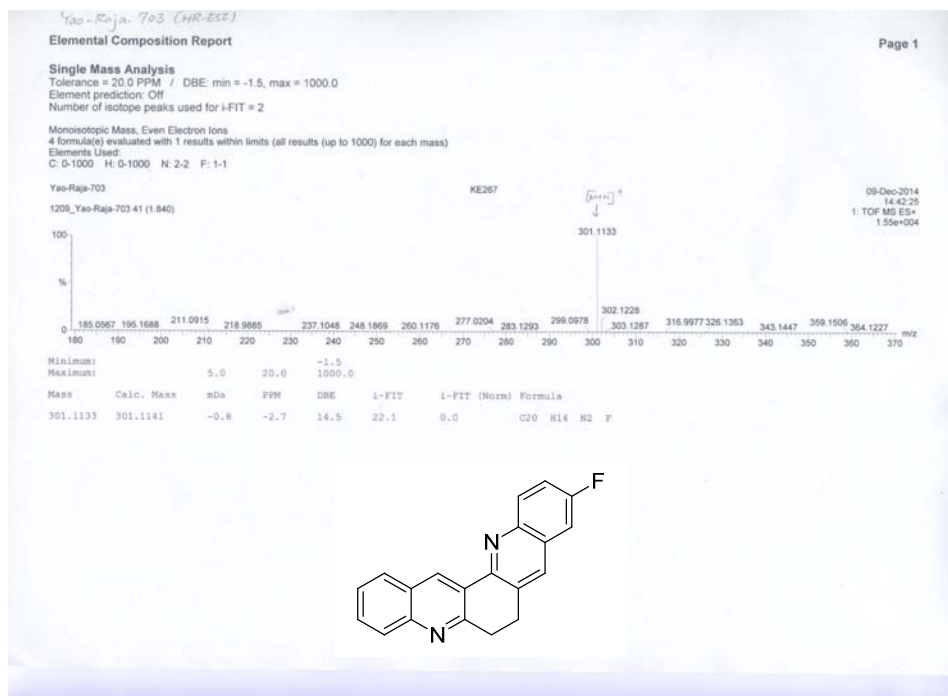





# 10-chloro-6,7-dihydrodibenzo[b,j][1,7]phenanthroline (4c) : HRMS

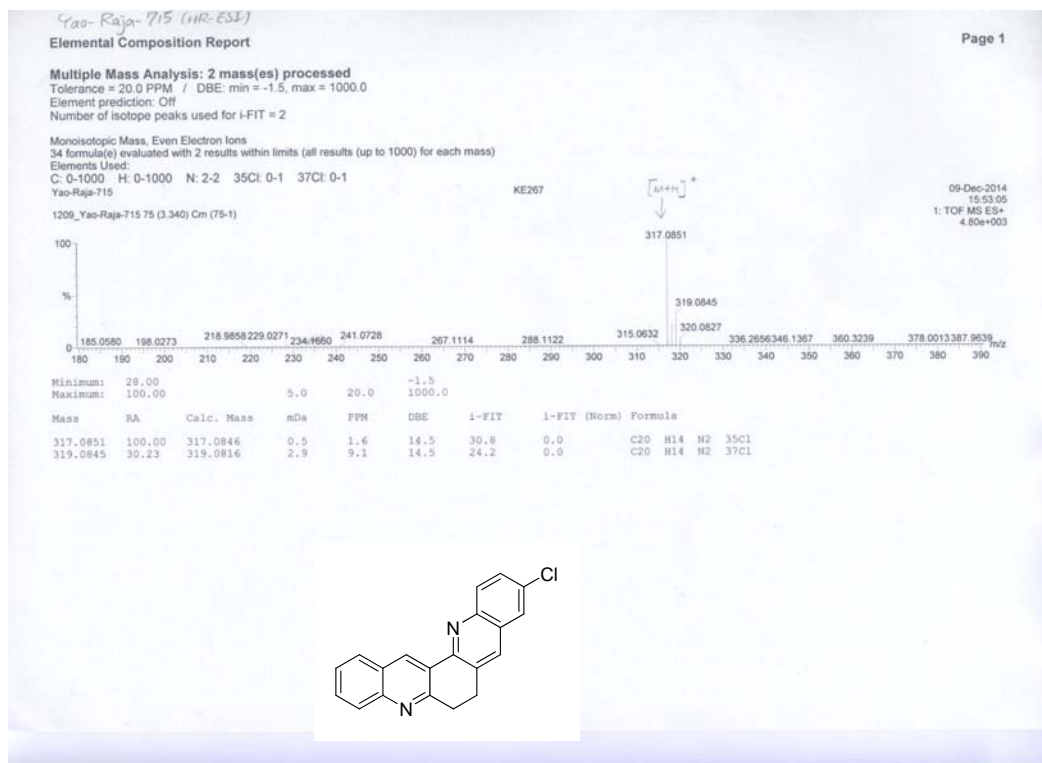

# 4. 10-bromo-6,7-dihydrodibenzo[b,j][1,7]phenanthroline (4d) : <sup>1</sup>H NMR (400 MHz, CDCl<sub>3</sub>)

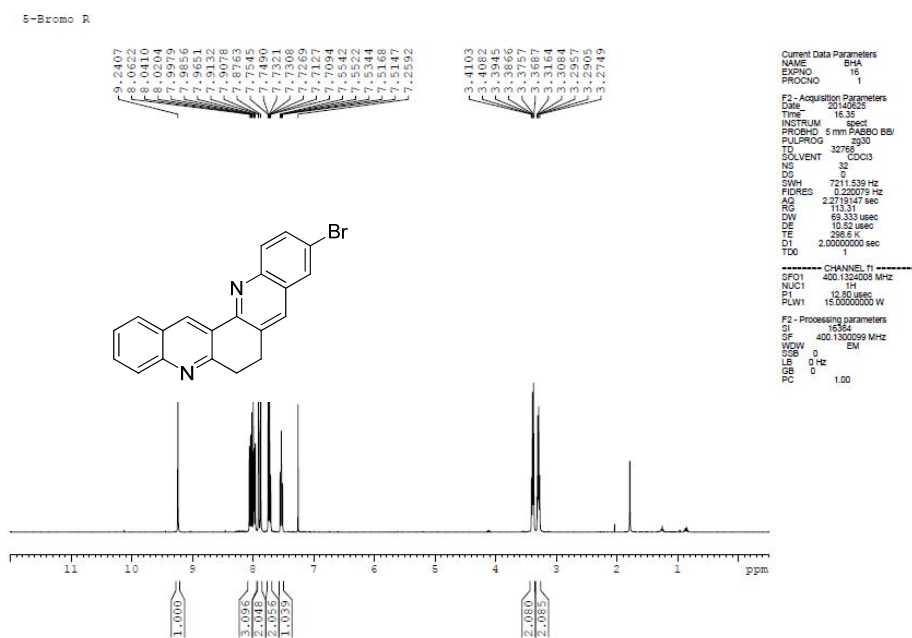

**10-bromo-6,7-dihydrodibenzo[b,j][1,7]phenanthroline (4d) :  $^{13}\text{C}$  NMR (100 MHz,  $\text{CDCl}_3$ )**

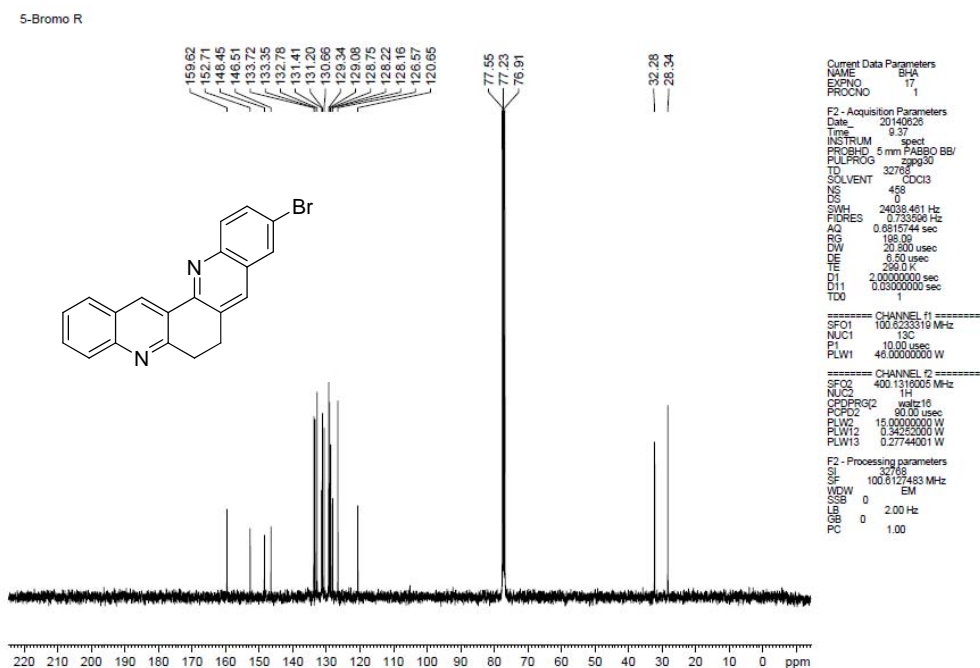

**10-bromo-6,7-dihydrodibenzo[b,j][1,7]phenanthroline (4d) : HRMS**

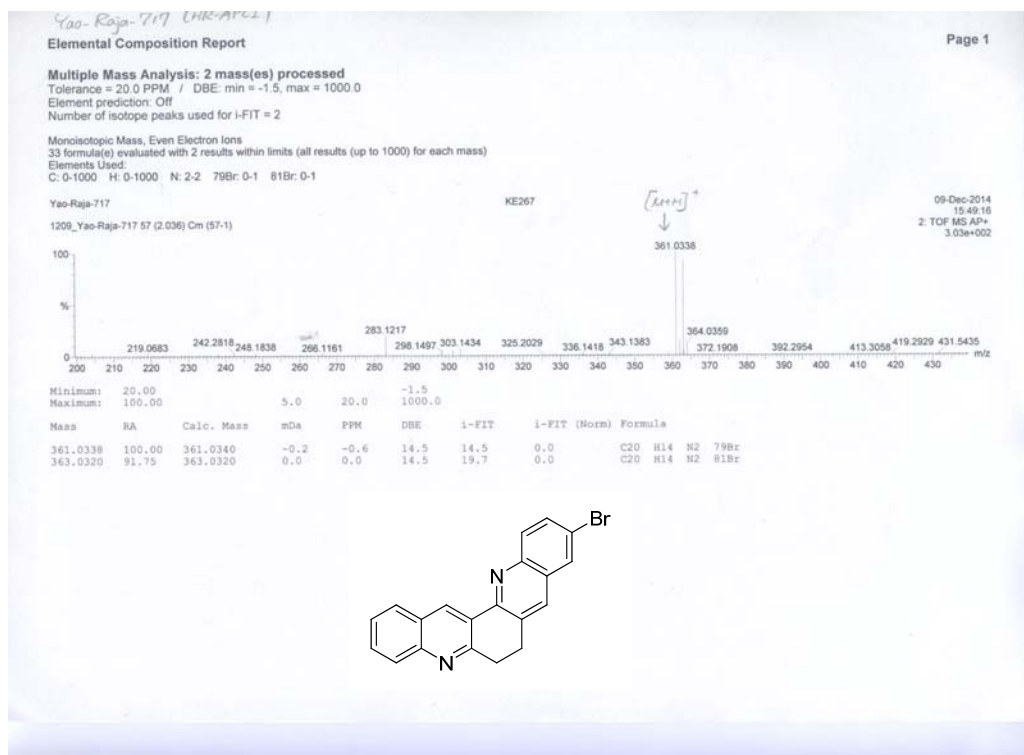

**5.10-methyl-6,7-dihydrodibenzo[b,j][1,7]phenanthroline (4e) : <sup>1</sup>H NMR (400 MHz, CDCl<sub>3</sub>)**

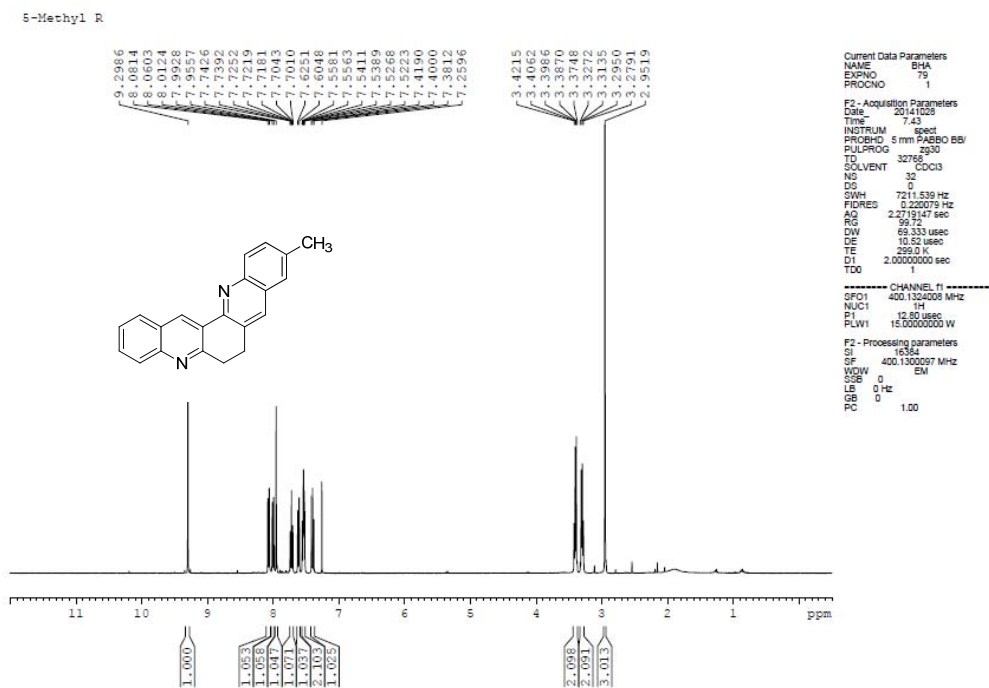

**10-methyl-6,7-dihydrodibenzo[b,j][1,7]phenanthroline (4e) : <sup>13</sup>C NMR (100 MHz, CDCl<sub>3</sub>)**

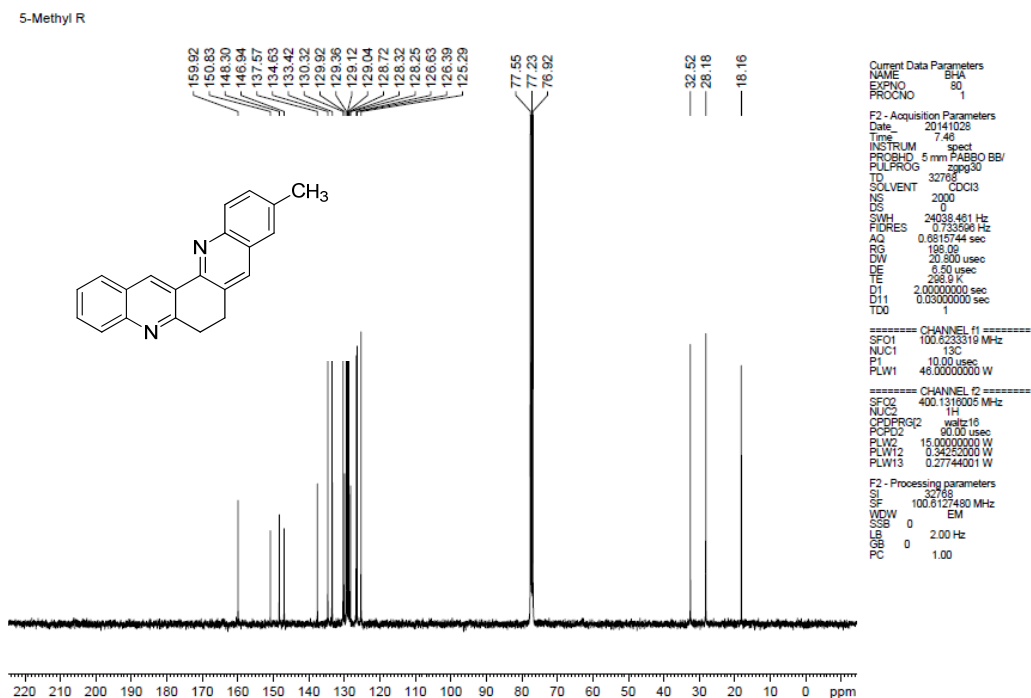

# 10-methyl-6,7-dihydrodibenzo[b,j][1,7]phenanthroline (4e) : HRMS

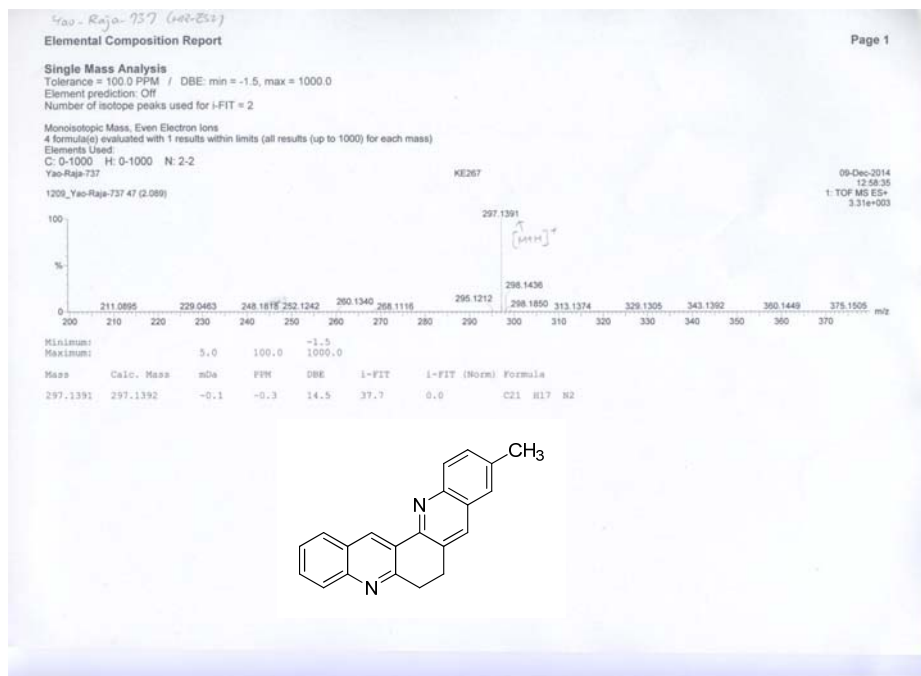

# 6. 11-bromo-6,7-dihydrodibenzo[b,j][1,7]phenanthroline (4f) : <sup>1</sup>H NMR (400 MHz, CDCl<sub>3</sub>)

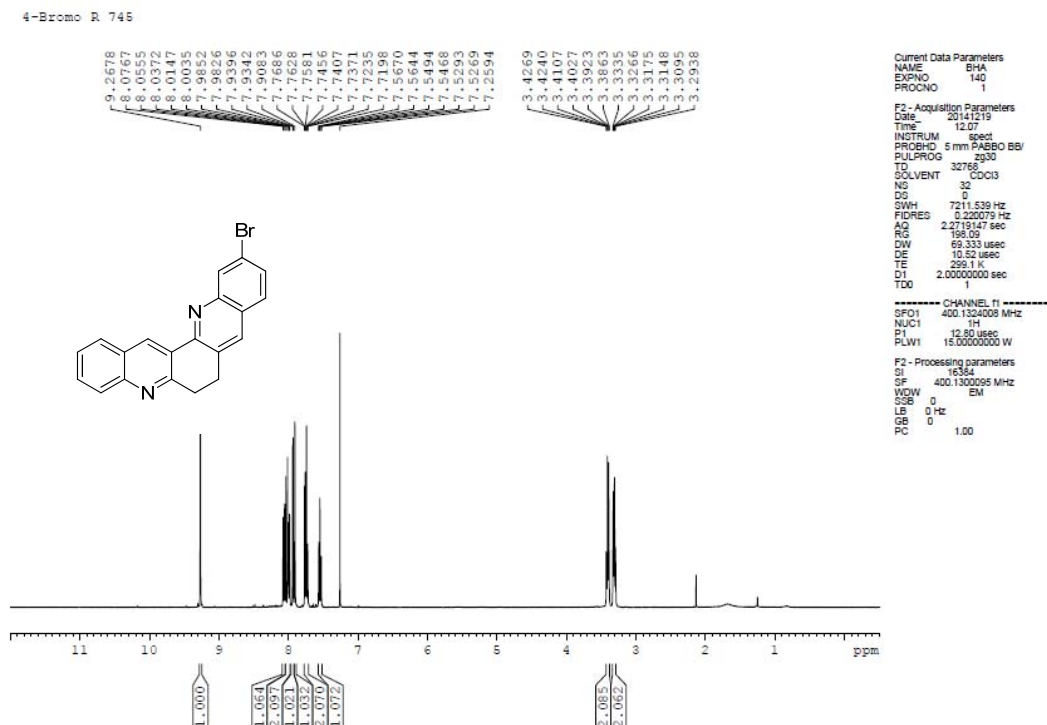

**11-bromo-6,7-dihydrodibenzo[b,j][1,7]phenanthroline (4f) :  $^{13}\text{C}$  NMR (100 MHz,  $\text{CDCl}_3$ )**

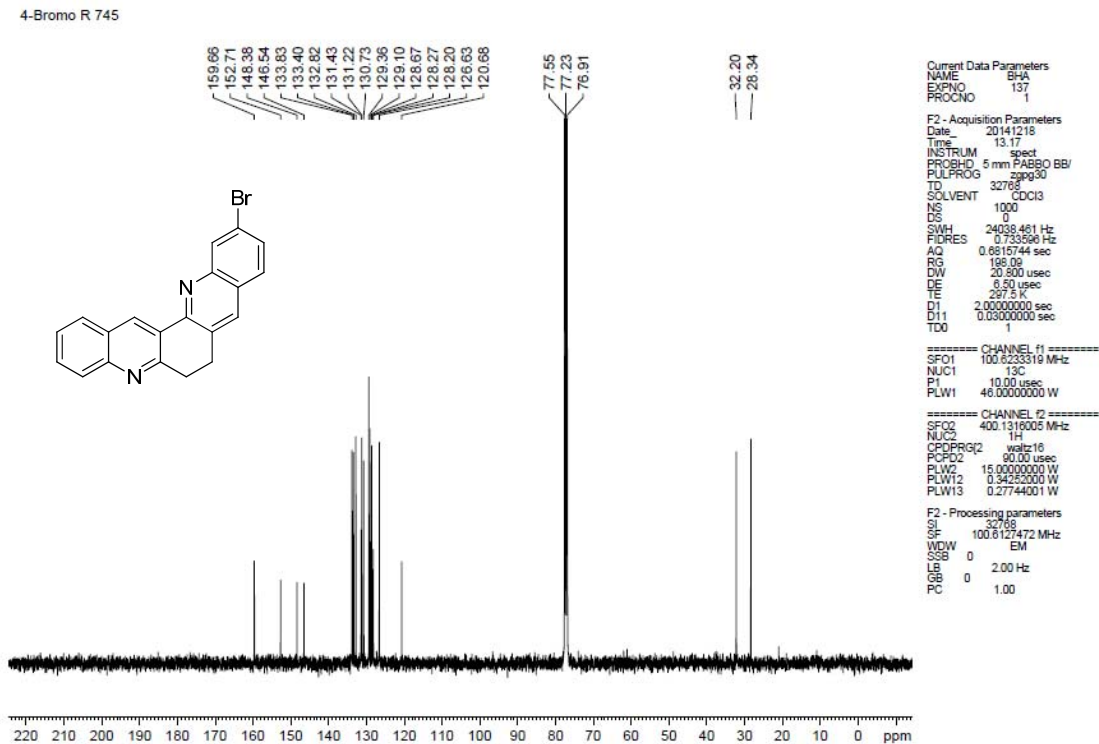

**11-bromo-6,7-dihydrodibenzo[b,j][1,7]phenanthroline (4f) : HRMS**

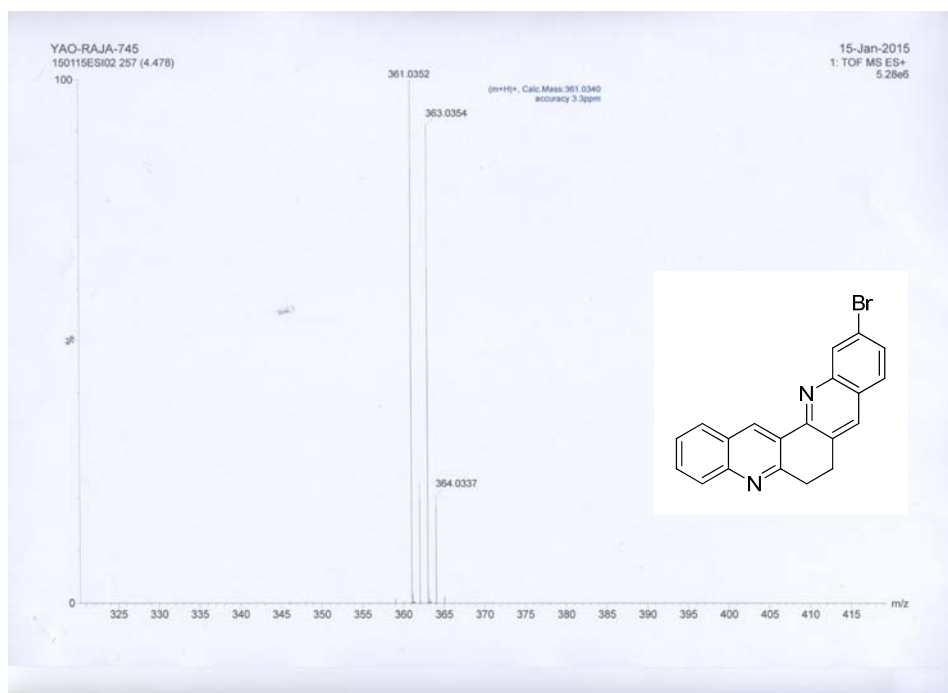

**7. 10,11-dimethoxy-6,7-dihydrodibenzo[b,j][1,7]phenanthroline (4g) : <sup>1</sup>H NMR (400 MHz, CDCl<sub>3</sub>)**

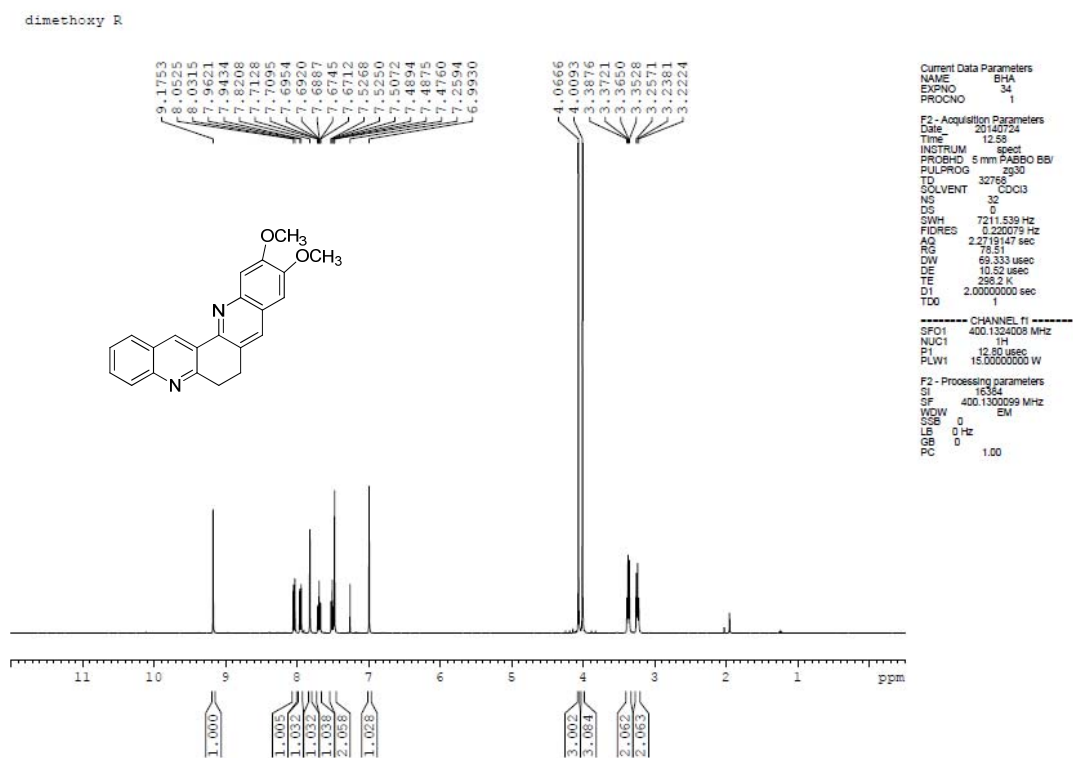

**10,11-dimethoxy-6,7-dihydrodibenzo[b,j][1,7]phenanthroline (4g) : <sup>13</sup>C NMR (100 MHz, CDCl<sub>3</sub>)**

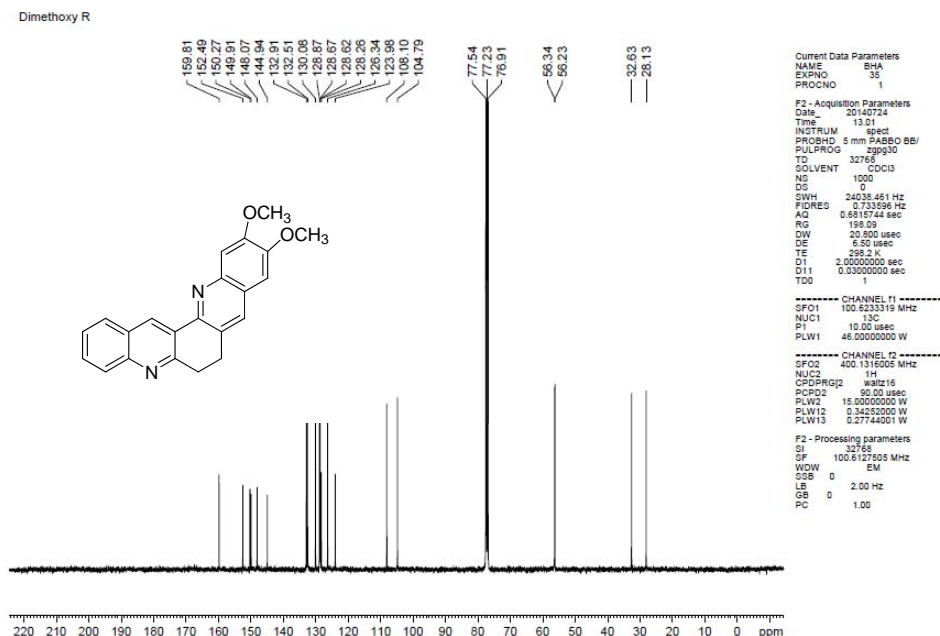





**10,11-bis(benzyloxy)-6,7-dihydrodibenzo[b,j][1,7]phenanthroline(4h) : <sup>13</sup>C NMR (100 MHz, CDCl<sub>3</sub>)**

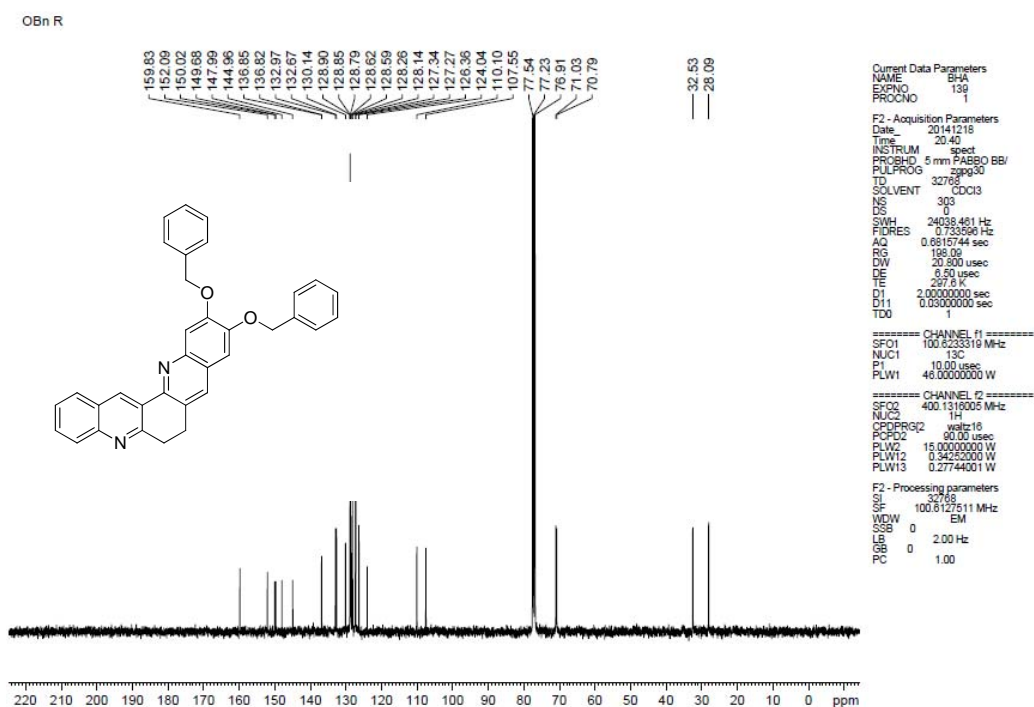

**10,11-bis(benzyloxy)-6,7-dihydrodibenzo[b,j][1,7]phenanthroline(4h) : HRMS**

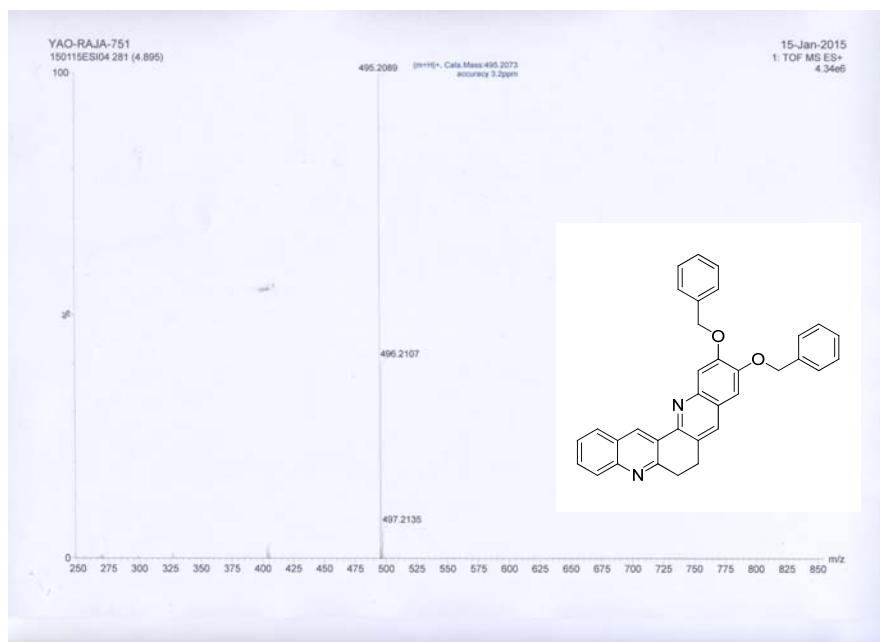

**9. 6,7-dihydro-[1,3]dioxolo[4',5':4,5]benzo[1,2-b]benzo[j][1,7]phenanthroline (4i) :  $^1\text{H}$  NMR (400 MHz,  $\text{CDCl}_3$ )**

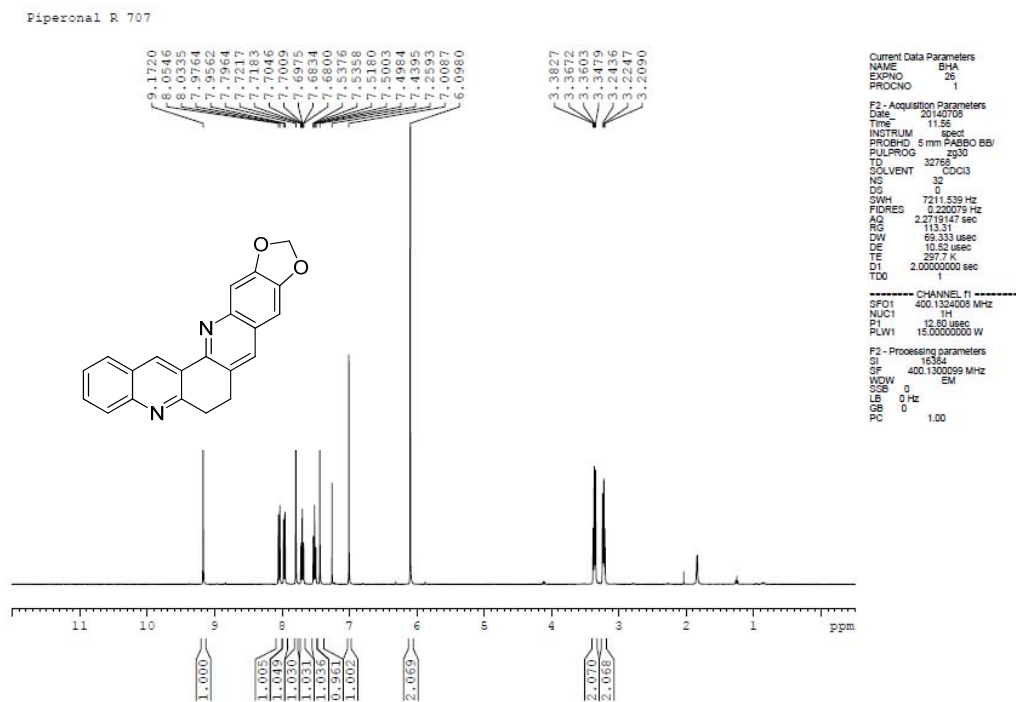

**6,7-dihydro-[1,3]dioxolo[4',5':4,5]benzo[1,2-b]benzo[j][1,7]phenanthroline (4i) :  $^{13}\text{C}$  NMR (100 MHz,  $\text{CDCl}_3$ )**

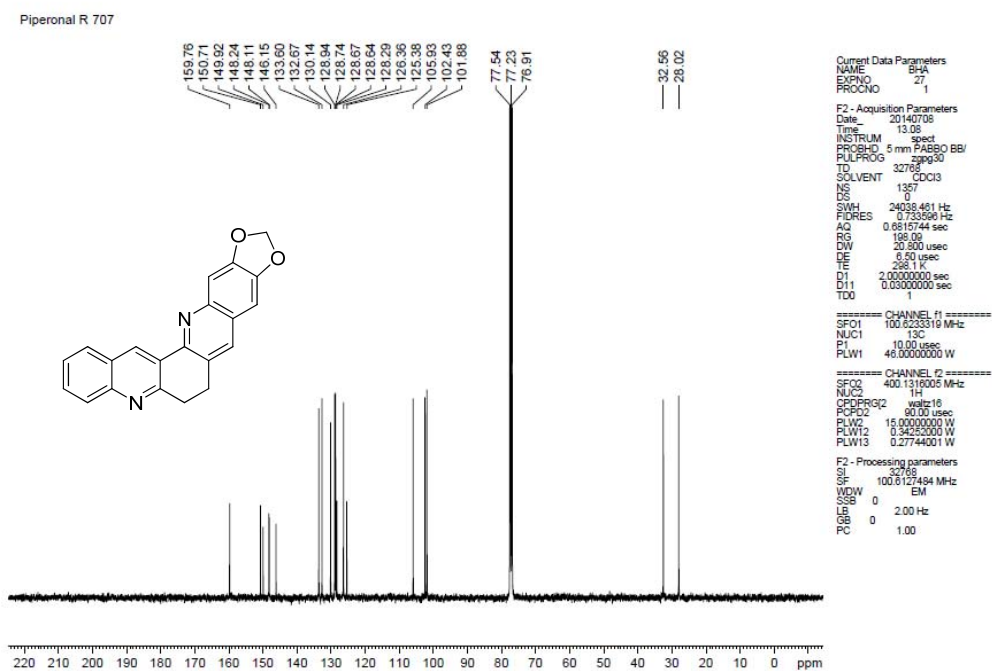

**6,7-dihydro-[1,3]dioxolo[4',5':4,5]benzo[1,2-b]benzo[j][1,7]phenanthroline (4i) : HRMS**

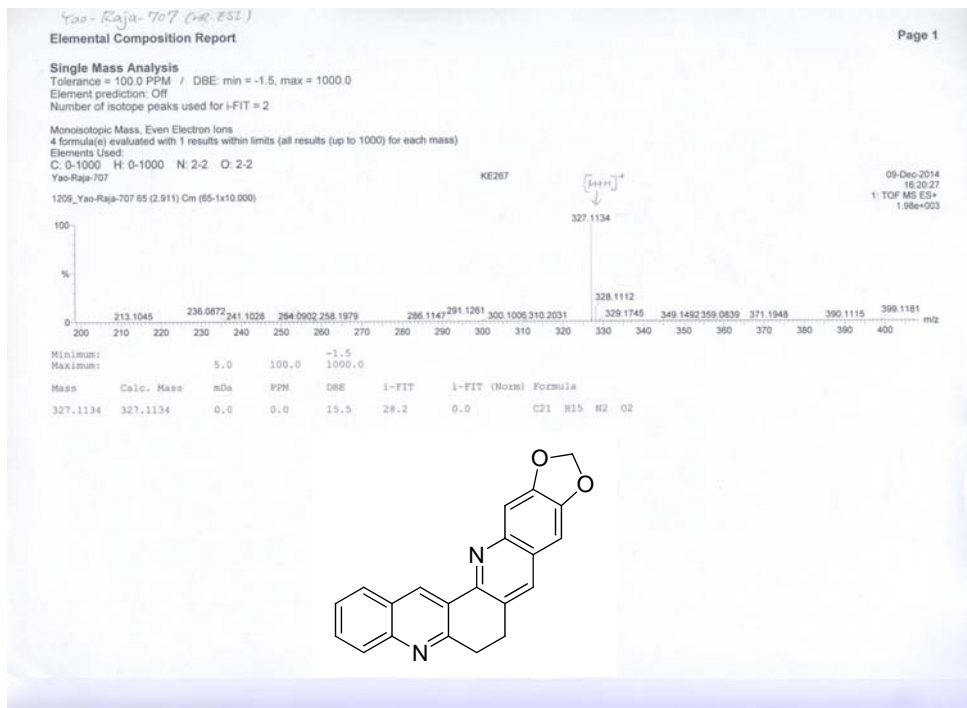

**10. 9,12-dimethoxy-6,7-dihydrodibenzo[b,j][1,7]phenanthroline (4j) : <sup>1</sup>H NMR (400 MHz, CDCl<sub>3</sub>)**

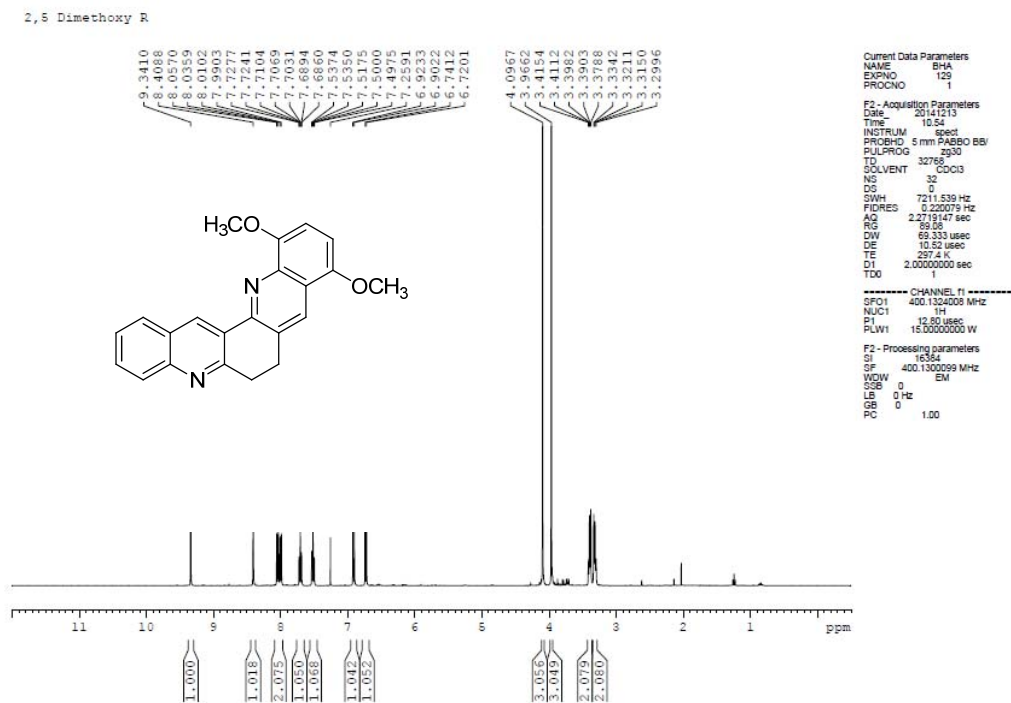

**9,12-dimethoxy-6,7-dihydrodibenzo[b,j][1,7]phenanthroline (4j) : <sup>13</sup>C NMR (100 MHz, CDCl<sub>3</sub>)**

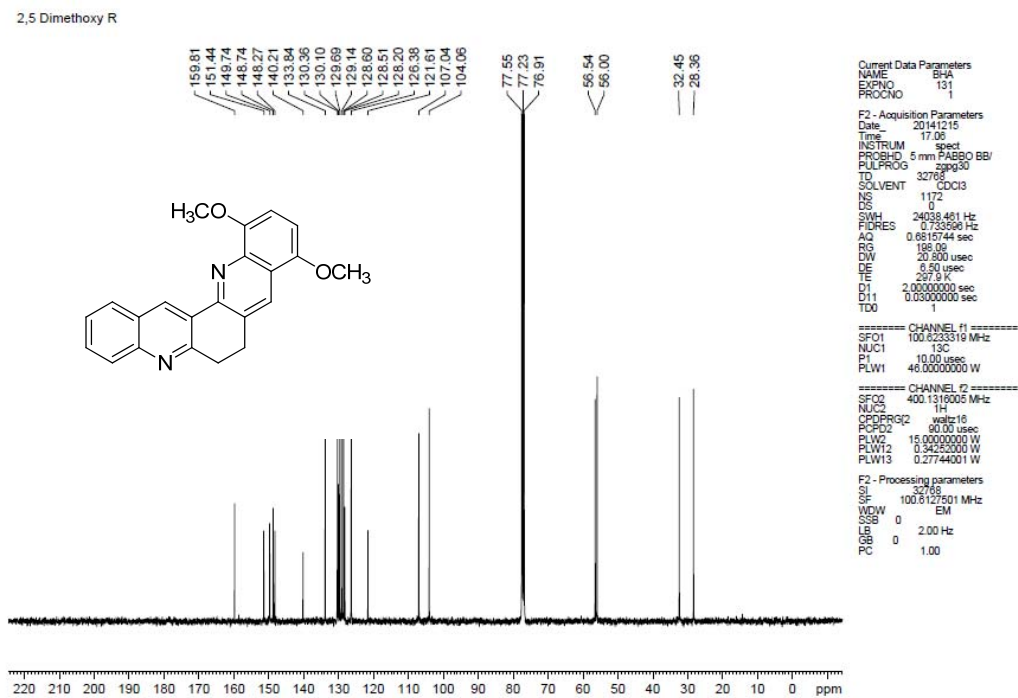

**9,12-dimethoxy-6,7-dihydrodibenzo[b,j][1,7]phenanthroline (4j) : HRMS**

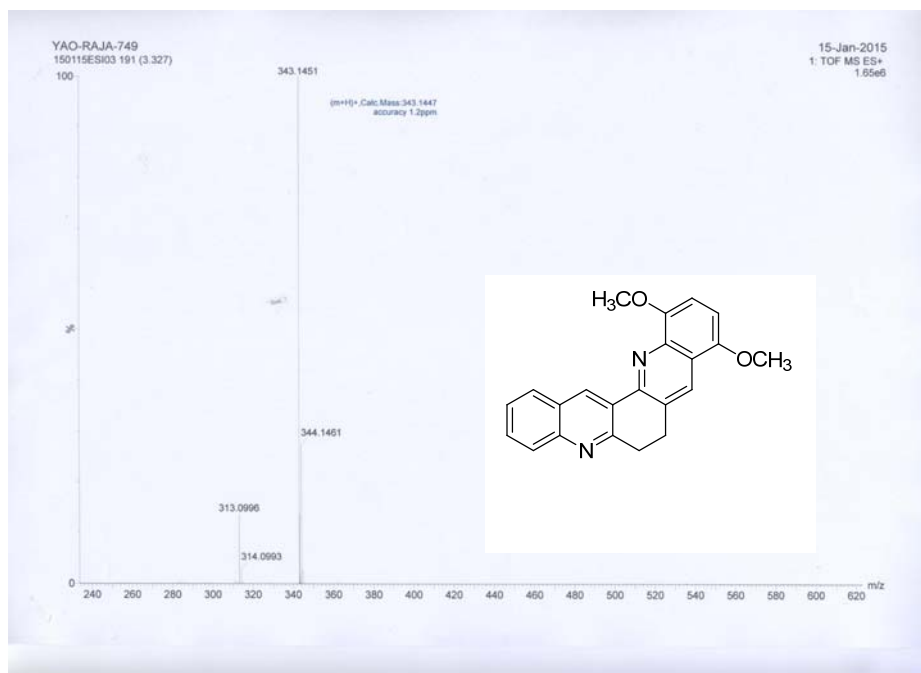

**11. 2-fluoro-6,7-dihydrodibenzo[b,j][1,7]phenanthroline (4k) : <sup>1</sup>H NMR (400 MHz, CDCl<sub>3</sub>)**

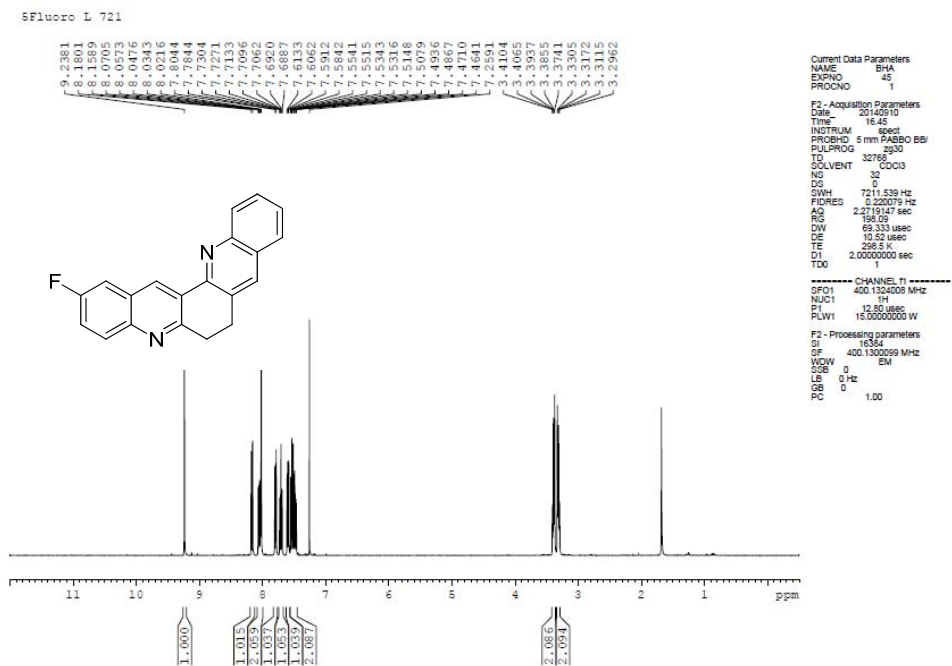

**2-fluoro-6,7-dihydrodibenzo[b,j][1,7]phenanthroline (4k) : <sup>13</sup>C NMR (100 MHz, CDCl<sub>3</sub>)**

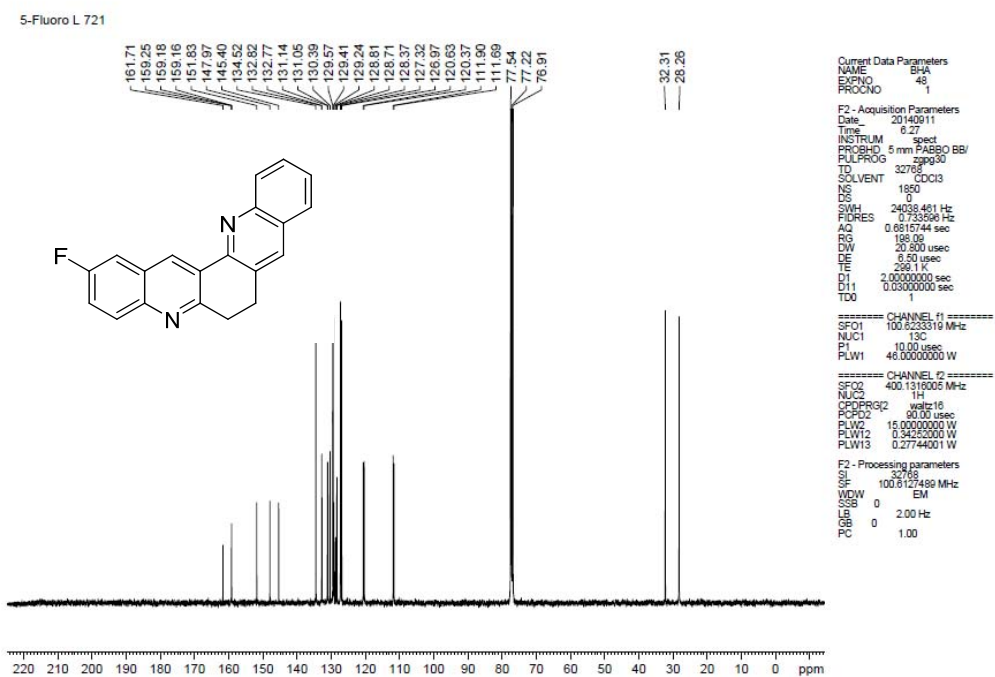

## 2-fluoro-6,7-dihydrodibenzo[b,j][1,7]phenanthroline (4k) : HRMS

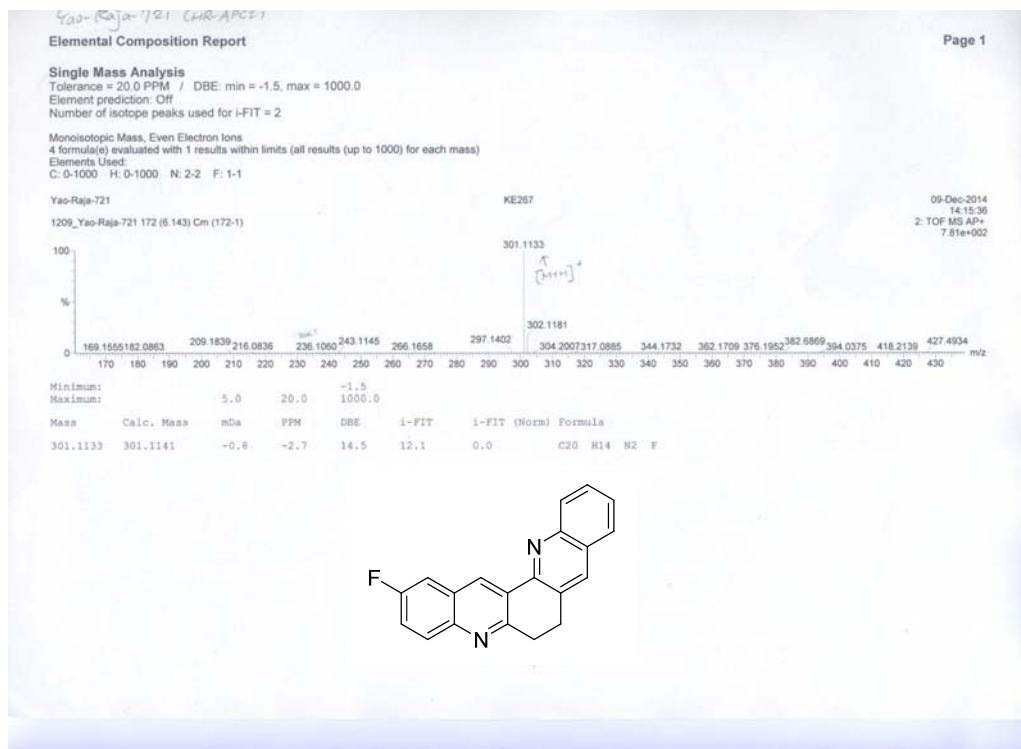

## 12. 2-chloro-6,7-dihydrodibenzo[b,j][1,7]phenanthroline (4l) : <sup>1</sup>H NMR (400 MHz, CDCl<sub>3</sub>)

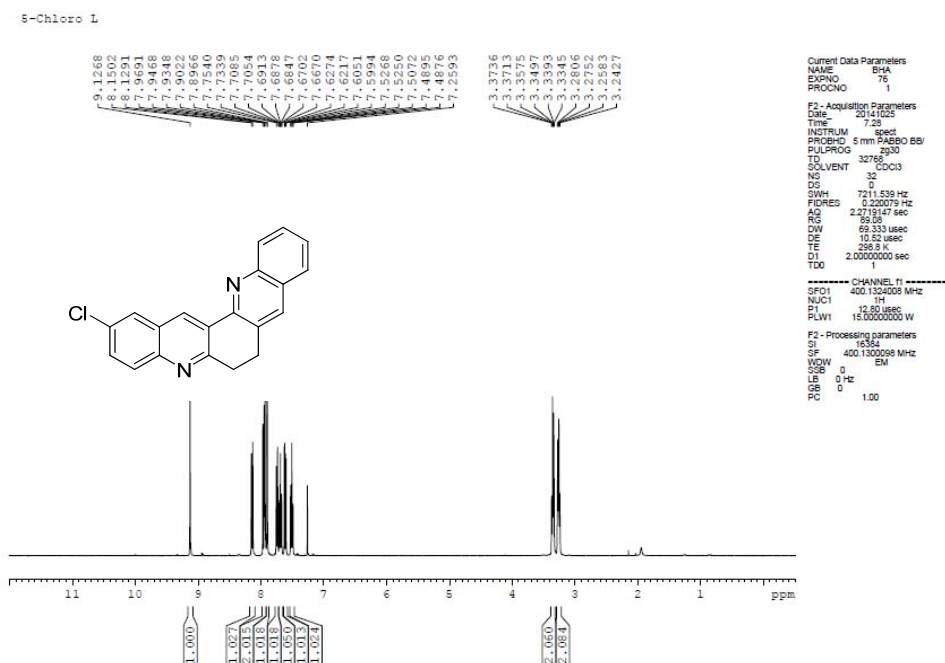

**2-chloro-6,7-dihydrodibenzo[b,j][1,7]phenanthroline (4I) :  $^{13}\text{C}$  NMR (100 MHz,  $\text{CDCl}_3$ )**

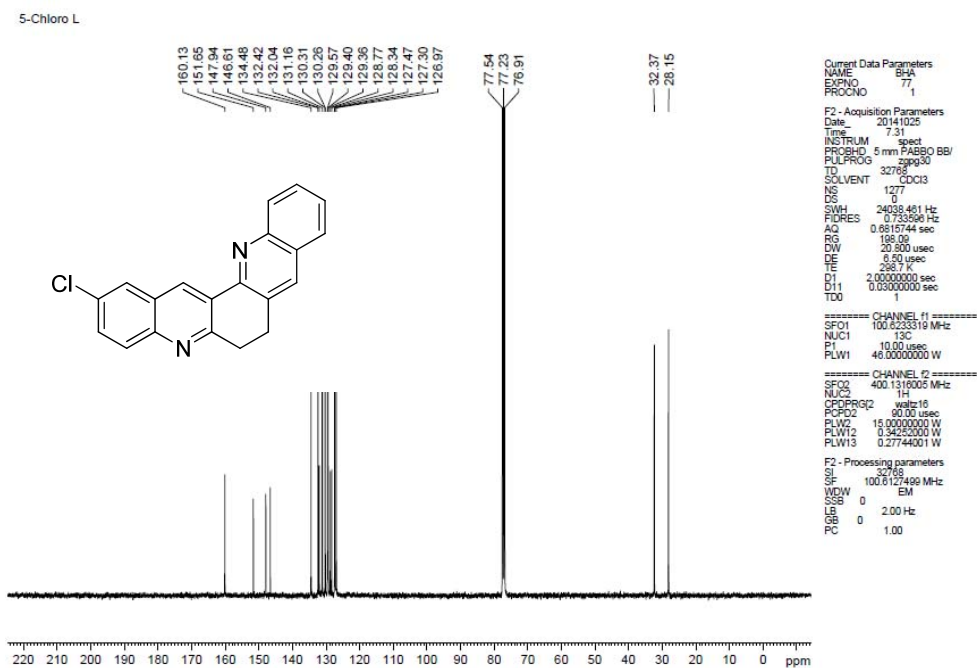

**2-chloro-6,7-dihydrodibenzo[b,j][1,7]phenanthroline (4I) : HRMS**

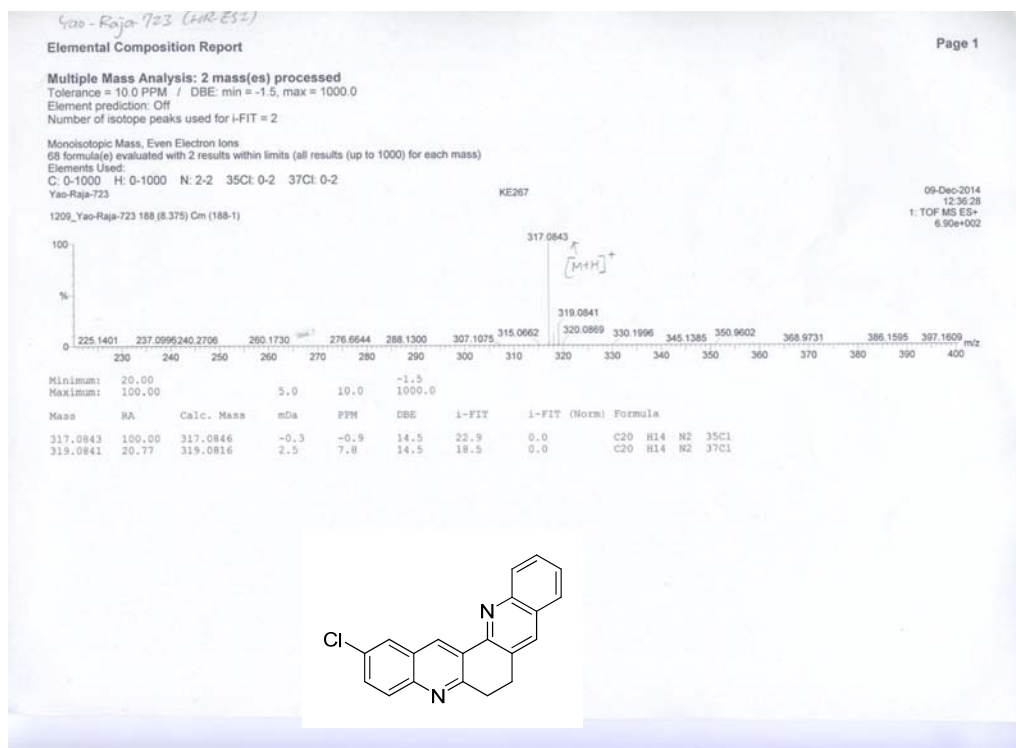

**13. 2-bromo-6,7-dihydrodibenzo[b,j][1,7]phenanthroline (4m) :  $^1\text{H}$  NMR (400 MHz,  $\text{CDCl}_3$ )**

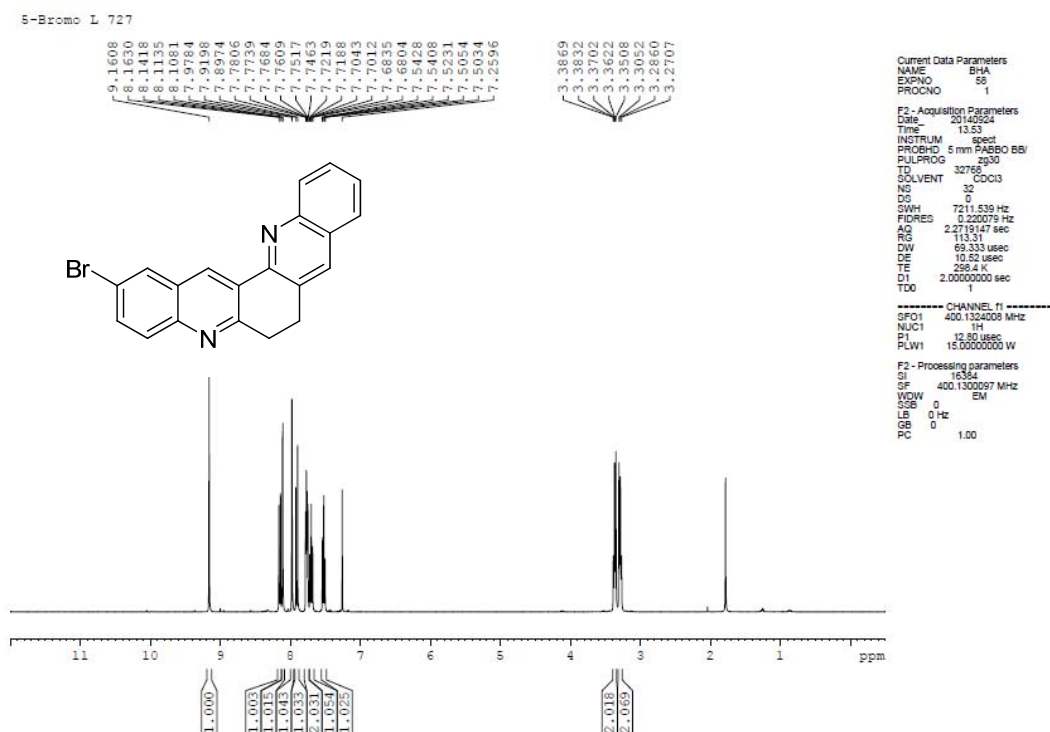

**2-bromo-6,7-dihydrodibenzo[b,j][1,7]phenanthroline (4m) :  $^{13}\text{C}$  NMR (100 MHz,  $\text{CDCl}_3$ )**

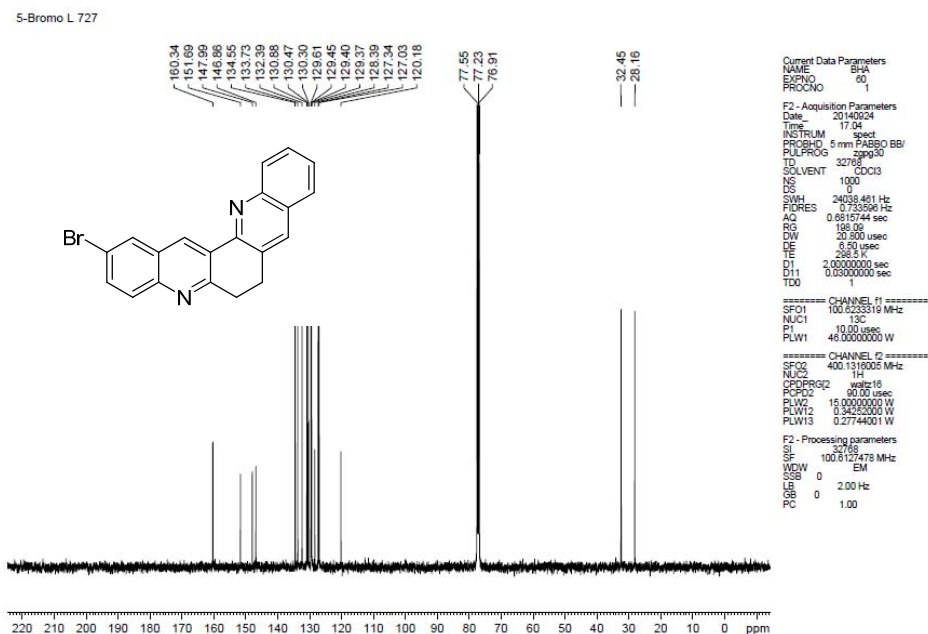



## 2-bromo-6,7-dihydrodibenzo[b,j][1,7]phenanthroline (4m) : HRMS

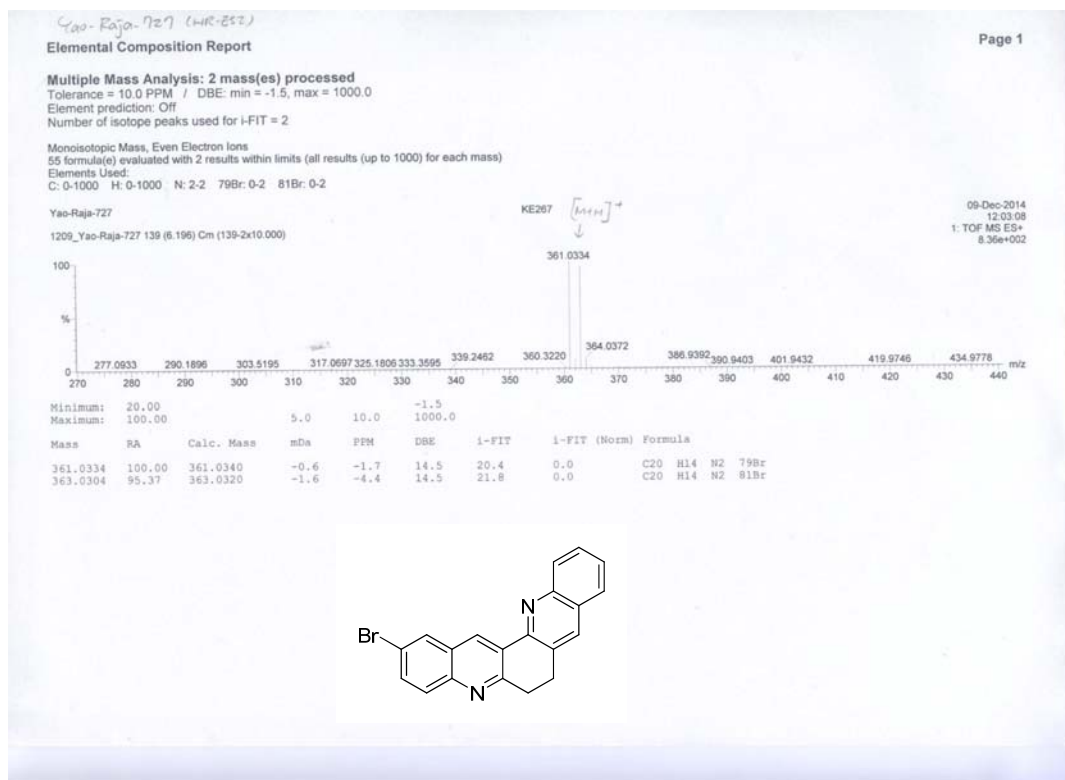

## 14. 2-methyl-6,7-dihydrodibenzo[b,j][1,7]phenanthroline (4n) : <sup>1</sup>H NMR (400 MHz, CDCl<sub>3</sub>)

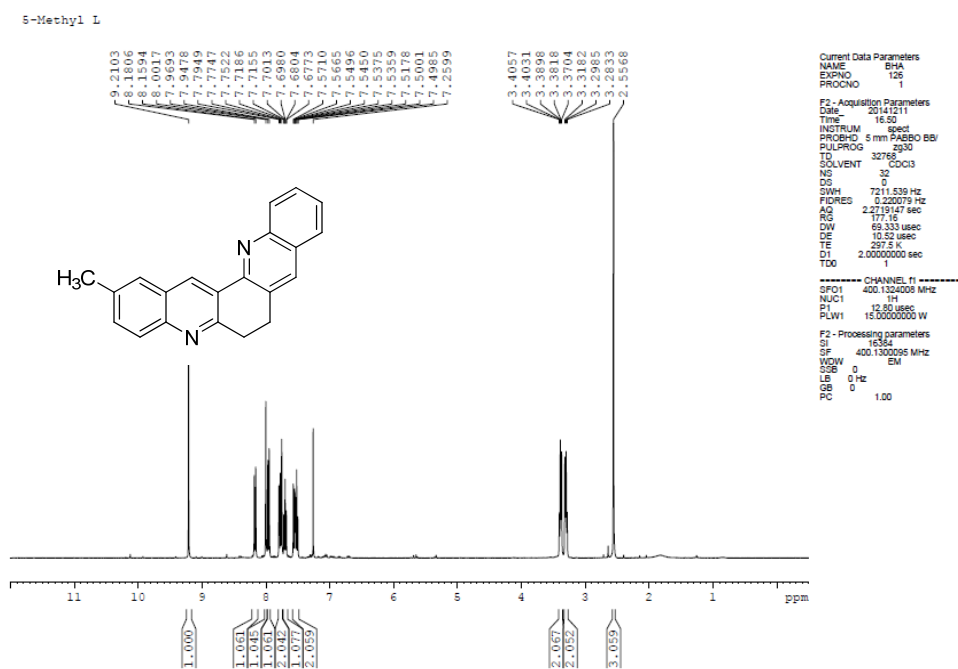

**2-methyl-6,7-dihydrodibenzo[b,j][1,7]phenanthroline (4n) :  $^{13}\text{C}$  NMR (100 MHz,  $\text{CDCl}_3$ )**

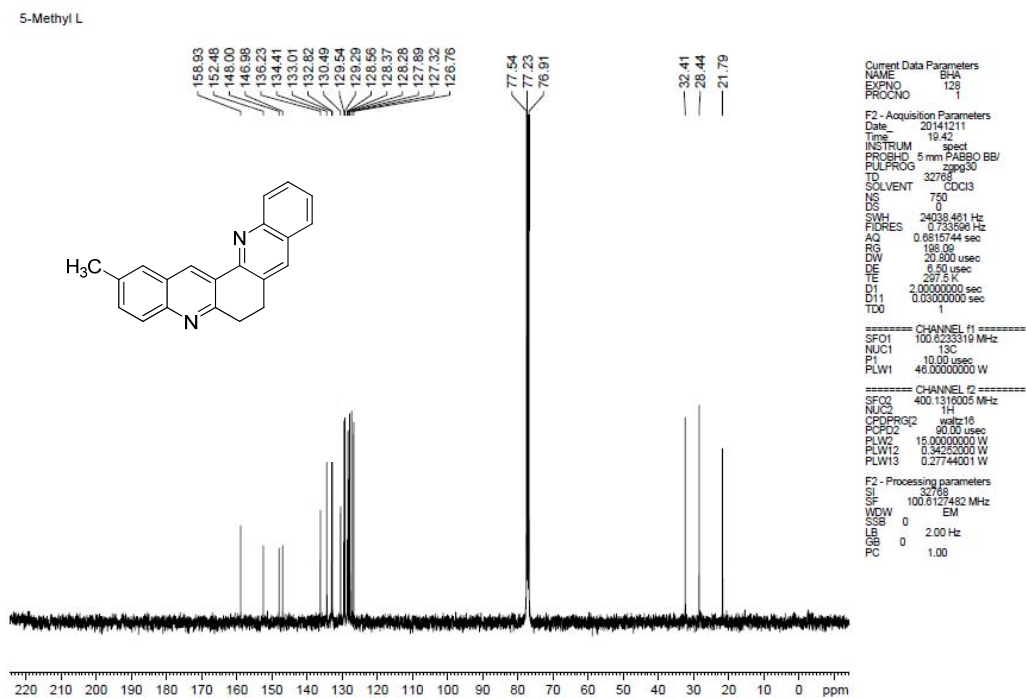

**2-methyl-6,7-dihydrodibenzo[b,j][1,7]phenanthroline (4n) : HRMS**

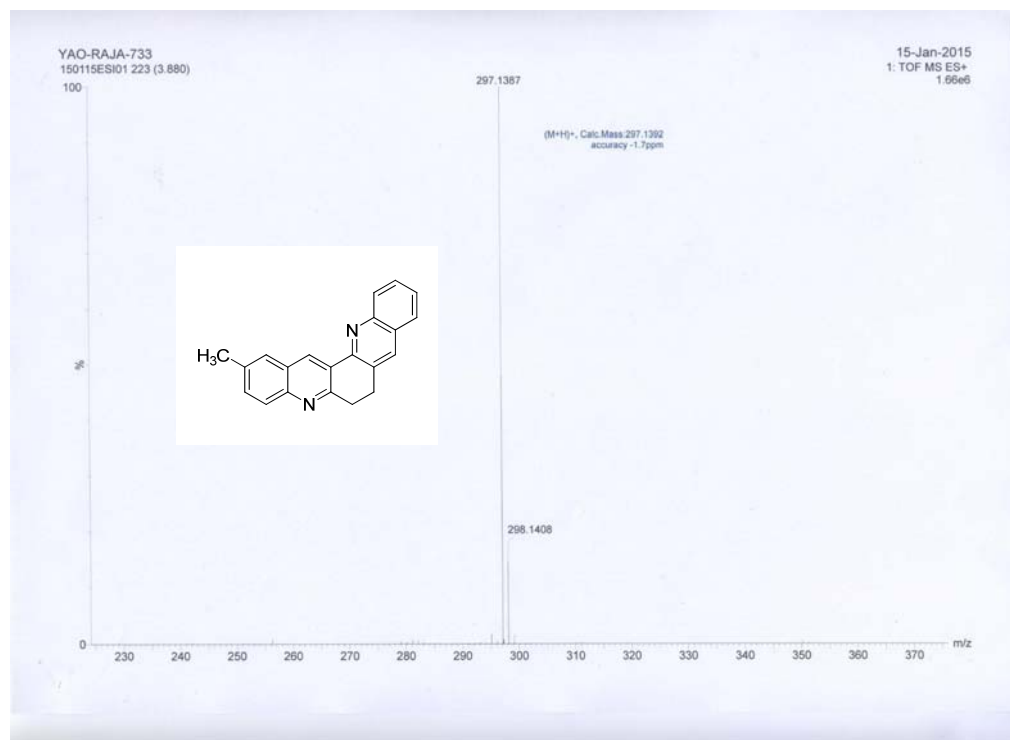

### 15. 4-chloro-6,7-dihydrodibenzo[b,j][1,7]phenanthroline (4o) : <sup>1</sup>H NMR (400 MHz, CDCl<sub>3</sub>)

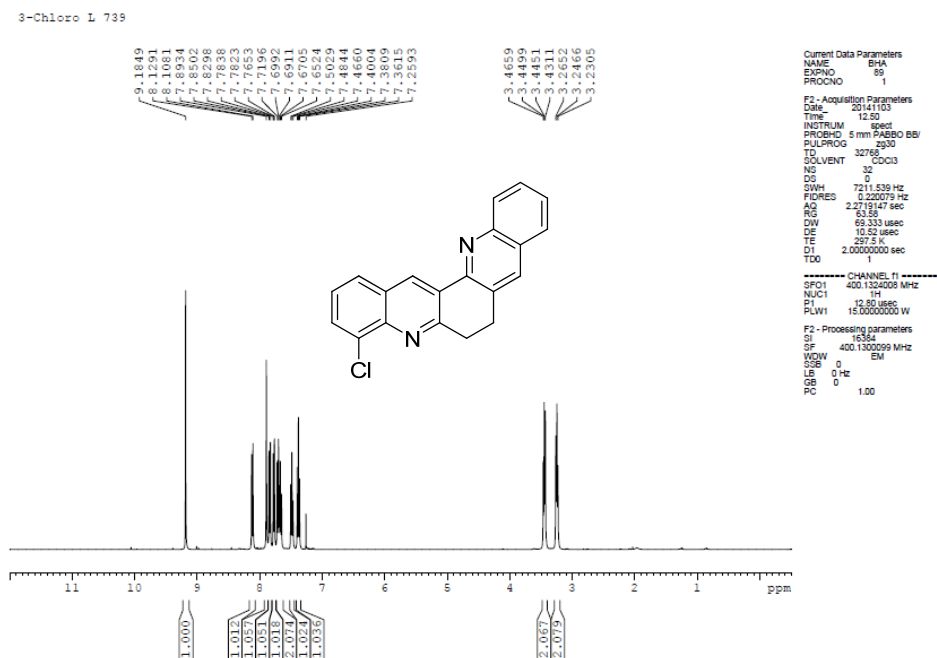

### 4-chloro-6,7-dihydrodibenzo[b,j][1,7]phenanthroline (4o) : <sup>13</sup>C NMR (100 MHz, CDCl<sub>3</sub>)

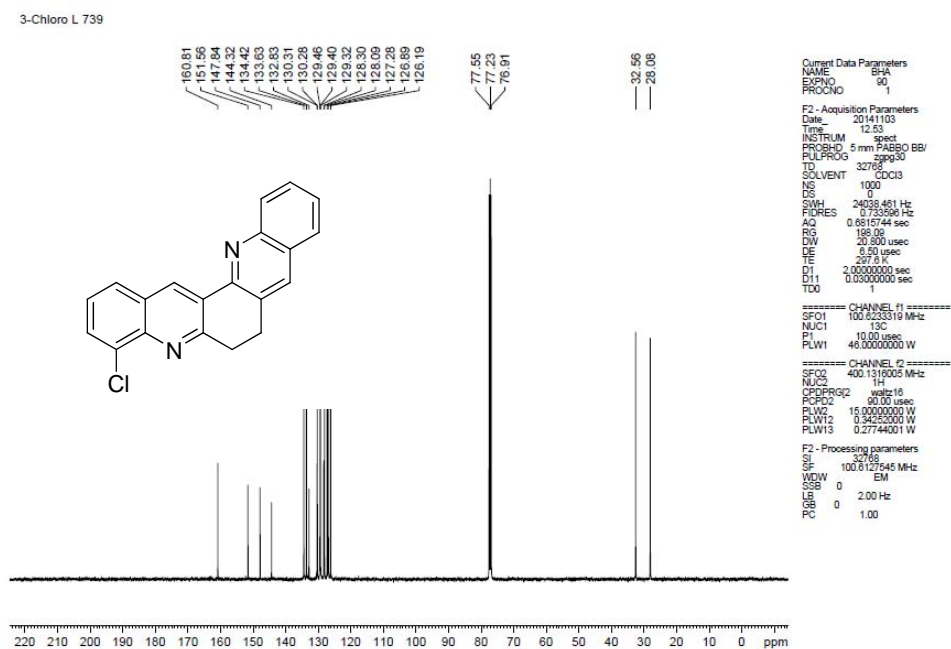

## 4-chloro-6,7-dihydrodibenzo[b,j][1,7]phenanthroline (4o) : HRMS

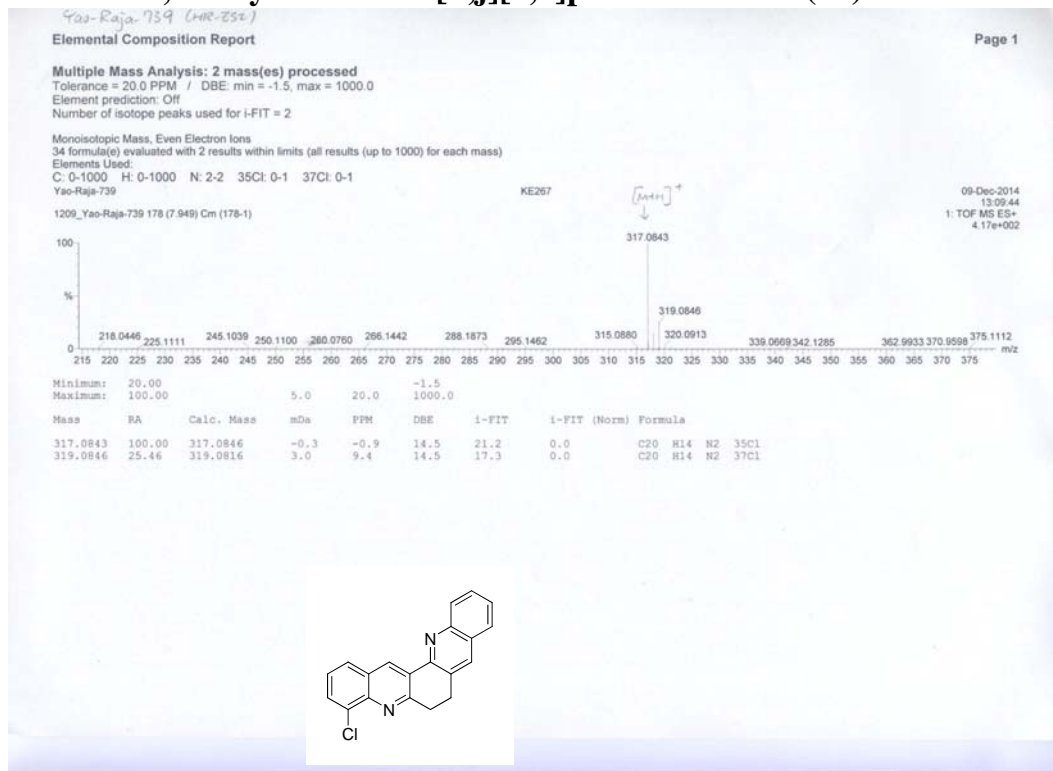

## 16. 4-bromo-6,7-dihydrodibenzo[b,j][1,7]phenanthroline (4p) : <sup>1</sup>H NMR (400 MHz, CDCl<sub>3</sub>)

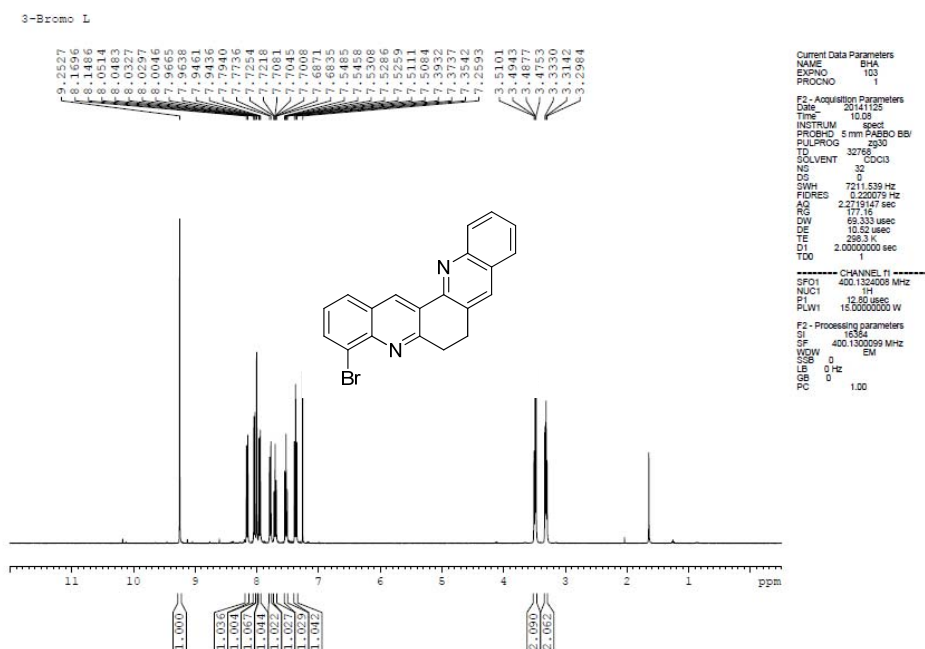

**4-bromo-6,7-dihydrodibenzo[b,j][1,7]phenanthroline (4p) : <sup>13</sup>C NMR (100 MHz, CDCl<sub>3</sub>)**

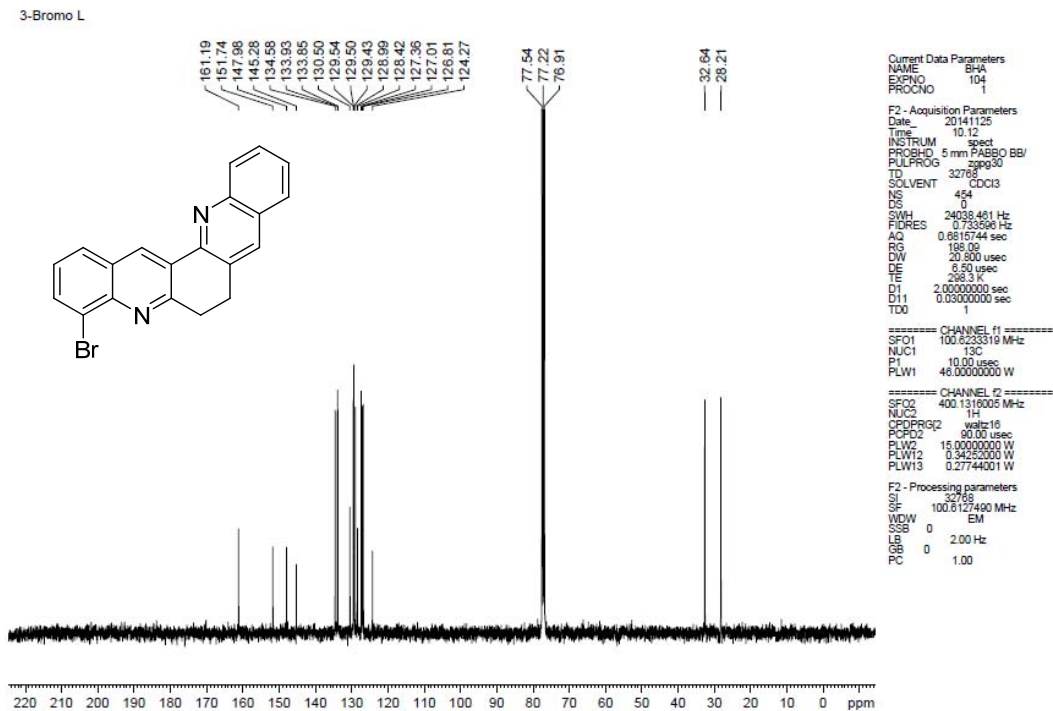

**4-bromo-6,7-dihydrodibenzo[b,j][1,7]phenanthroline (4p) : HRMS**

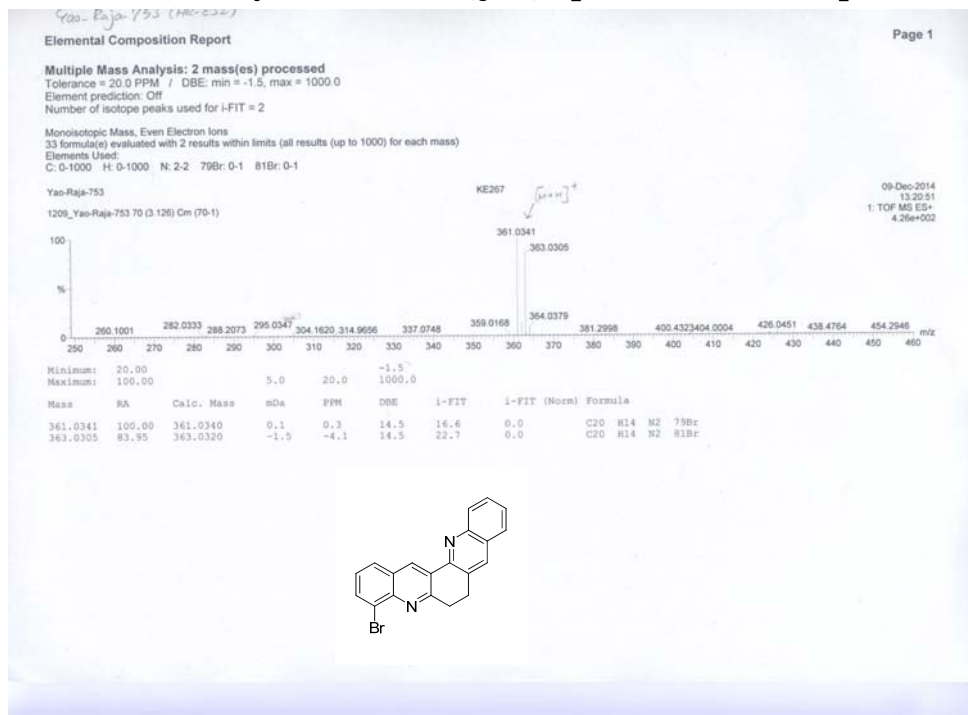

**17. 4-methyl-6,7-dihydrodibenzo[b,j][1,7]phenanthroline (4q) : <sup>1</sup>H NMR (400 MHz, CDCl<sub>3</sub>)**

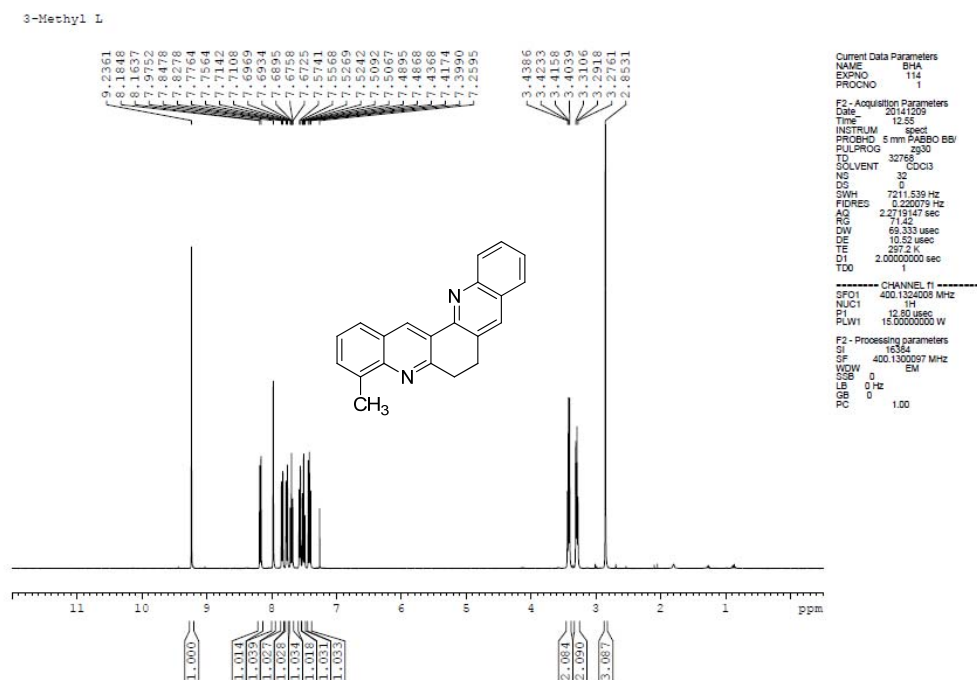

**4-methyl-6,7-dihydrodibenzo[b,j][1,7]phenanthroline (4q) : <sup>13</sup>C NMR (100 MHz, CDCl<sub>3</sub>)**

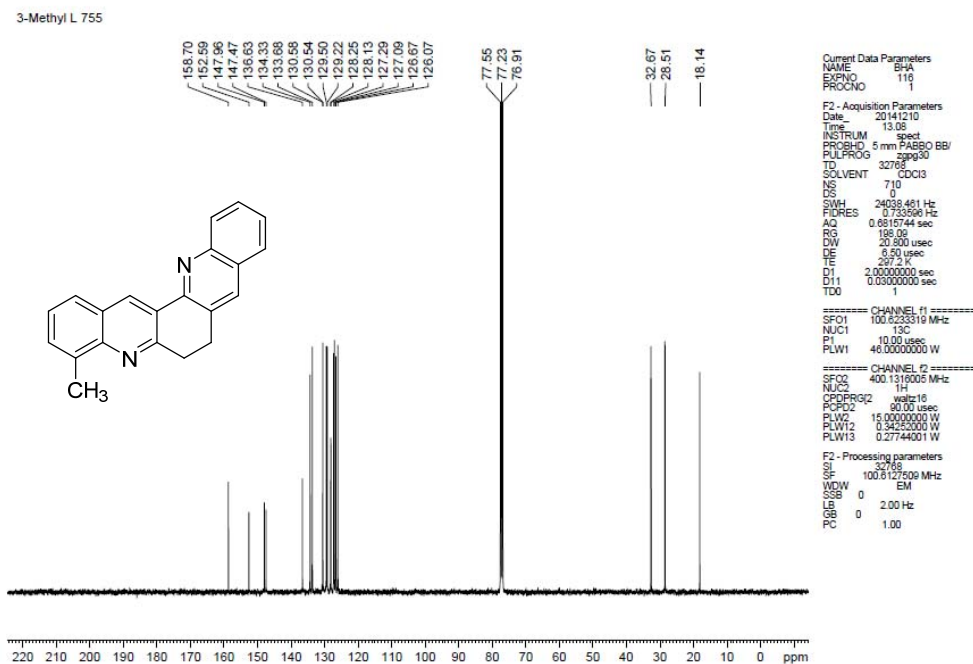

### 4-methyl-6,7-dihydrodibenzo[b,j][1,7]phenanthroline (4q) : HRMS

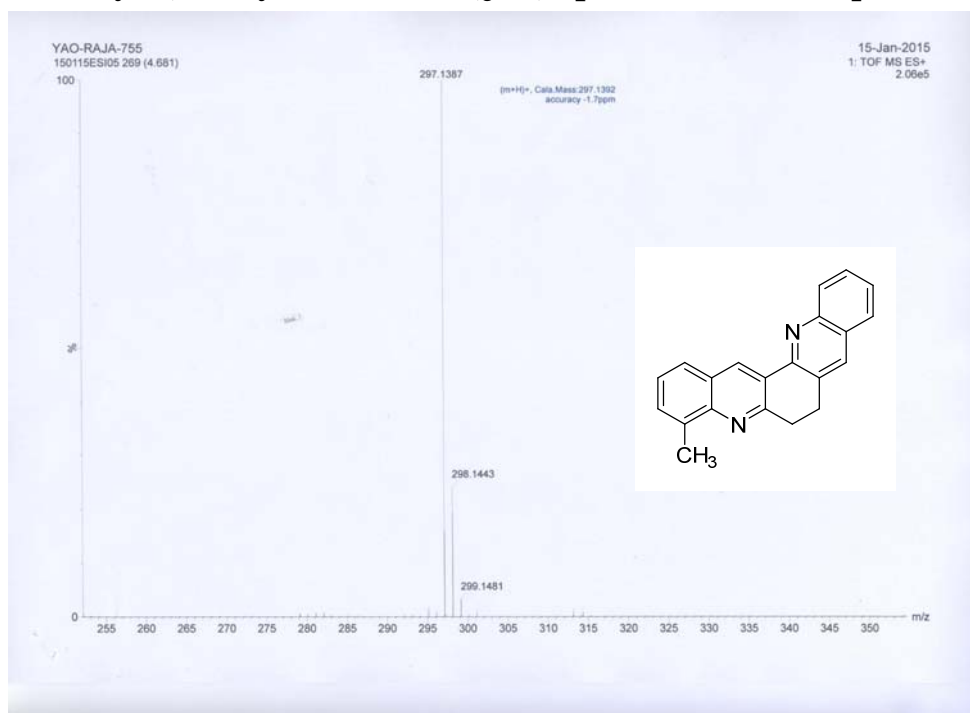

### 18. 2,3-dimethoxy-6,7-dihydrodibenzo[b,j][1,7]phenanthroline (4r) : <sup>1</sup>H NMR (400 MHz, CDCl<sub>3</sub>)

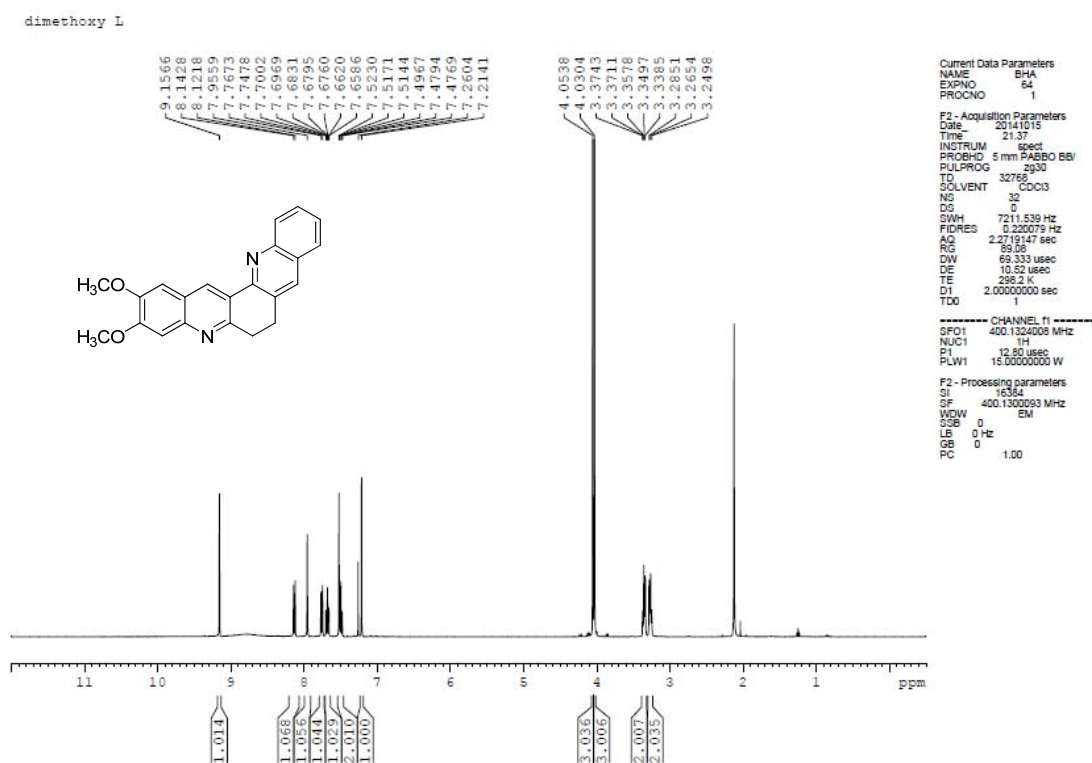

**2,3-dimethoxy-6,7-dihydrodibenzo[b,j][1,7]phenanthroline (4r) : <sup>13</sup>C NMR (100 MHz, CDCl<sub>3</sub>)**

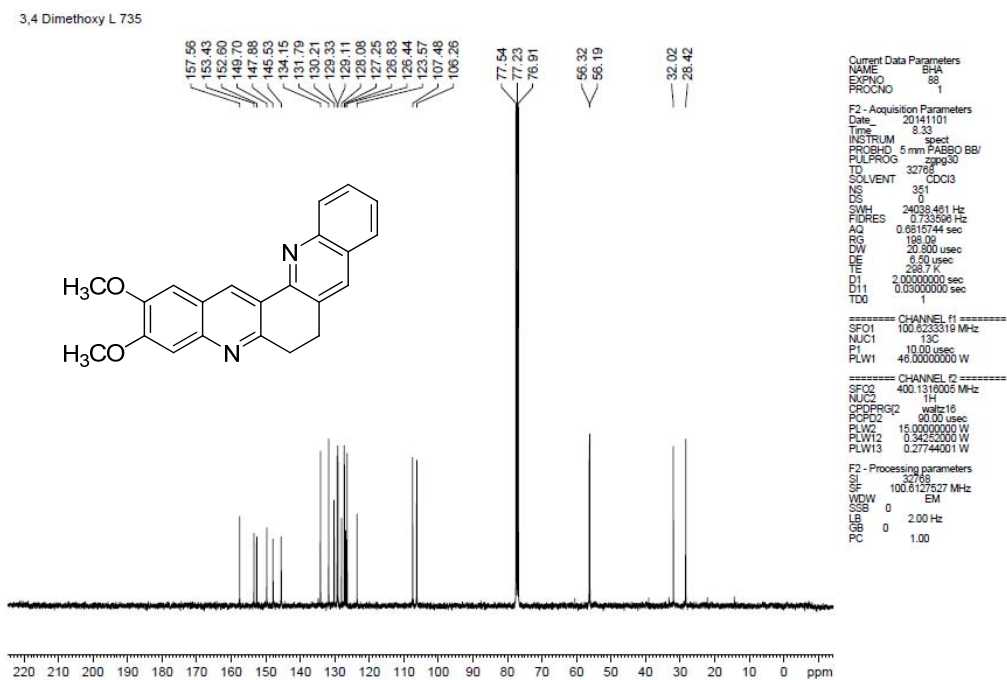

**2,3-dimethoxy-6,7-dihydrodibenzo[b,j][1,7]phenanthroline (4r) : HRMS**

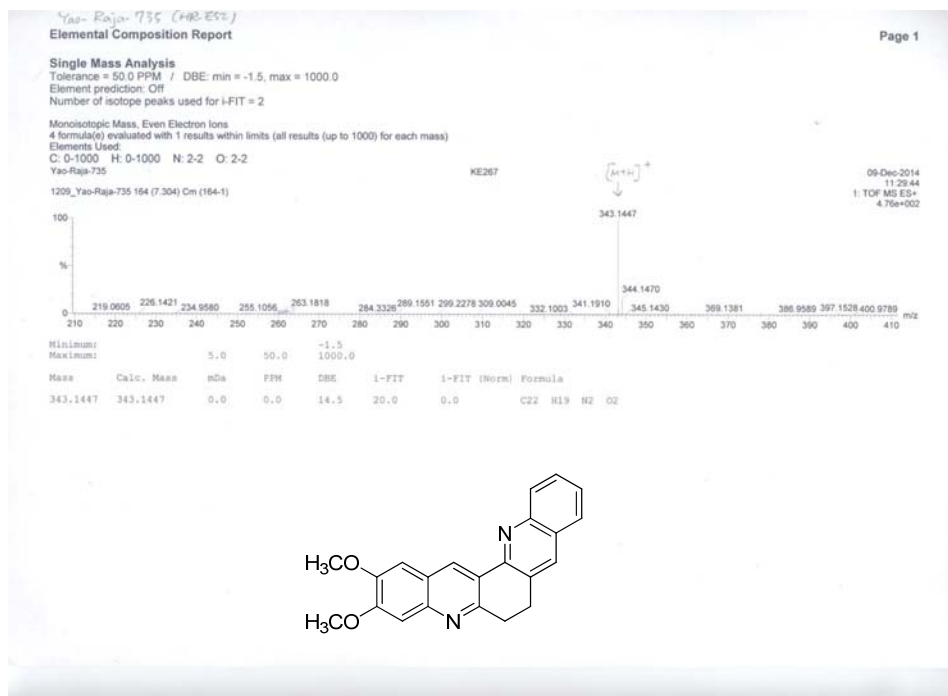



19. 6,7-dihydro-[1,3]dioxolo[4',5':4,5]benzo[1,2-j]benzo[b][1,7]phenanthroline (4s) : <sup>1</sup>H NMR (400 MHz, CDCl<sub>3</sub>)

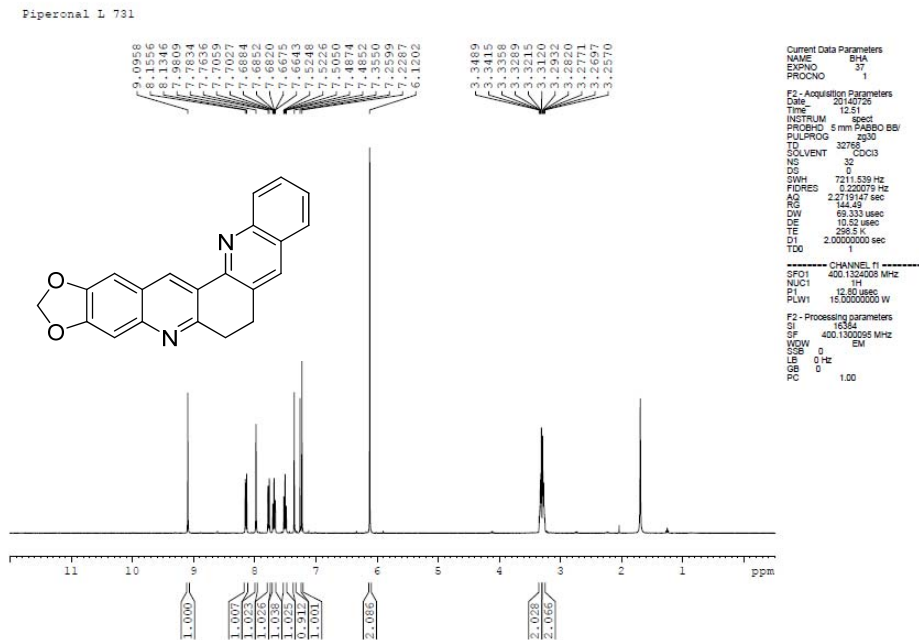

6,7-dihydro-[1,3]dioxolo[4',5':4,5]benzo[1,2-j]benzo[b][1,7]phenanthroline (4s) : <sup>13</sup>C NMR (100 MHz, CDCl<sub>3</sub>)

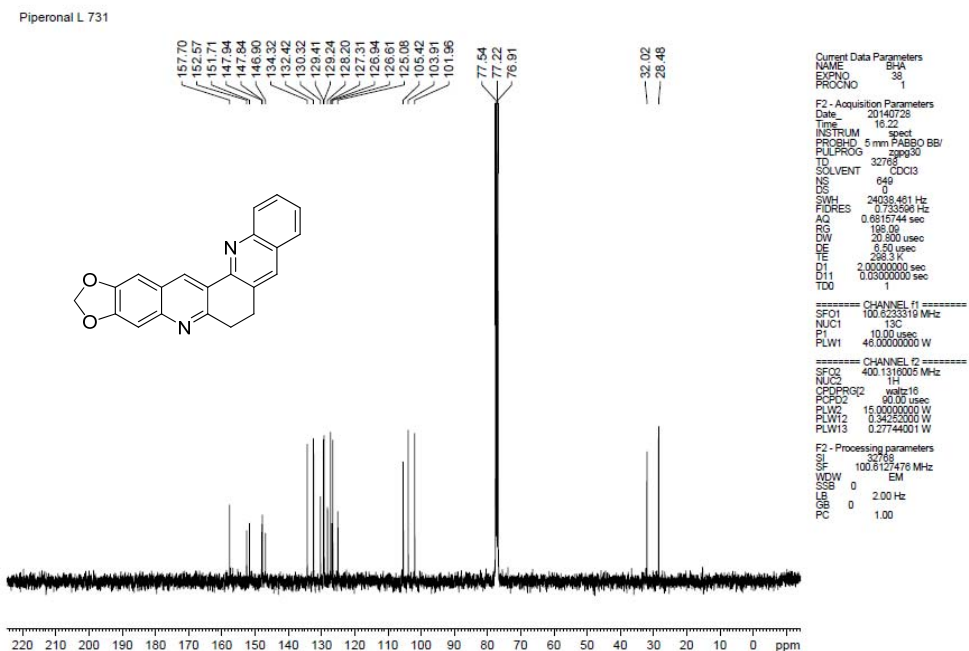

**6,7-dihydro-[1,3]dioxolo[4',5':4,5]benzo[1,2-j]benzo[b][1,7]phenanthroline (4s) : HRMS**

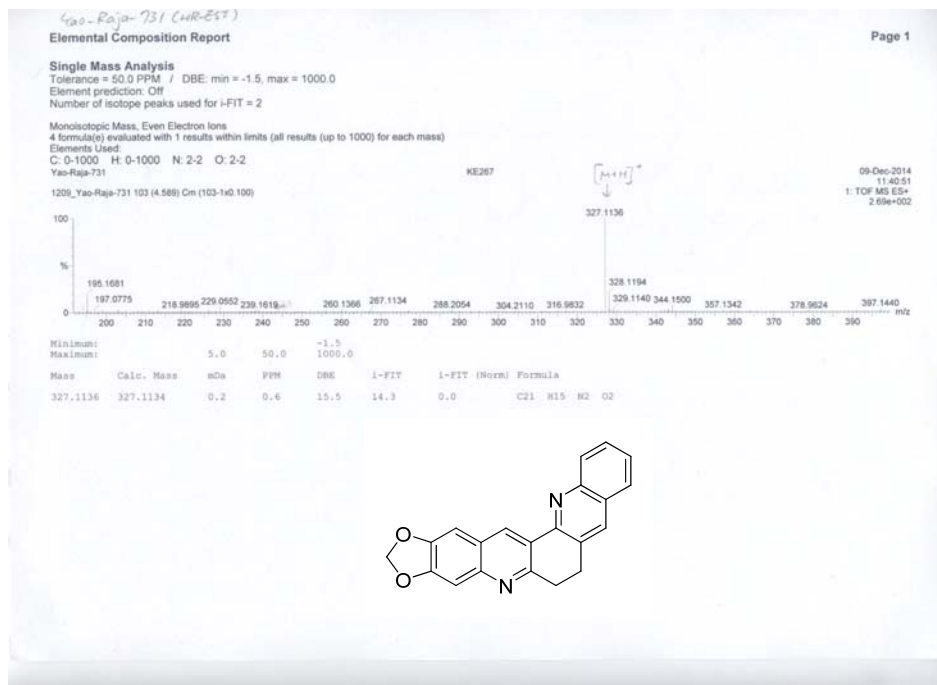

**20. 2,10-difluoro-6,7-dihydrodibenzo[b,j][1,7]phenanthroline (4t) : <sup>1</sup>H NMR (400 MHz, CDCl<sub>3</sub>)**

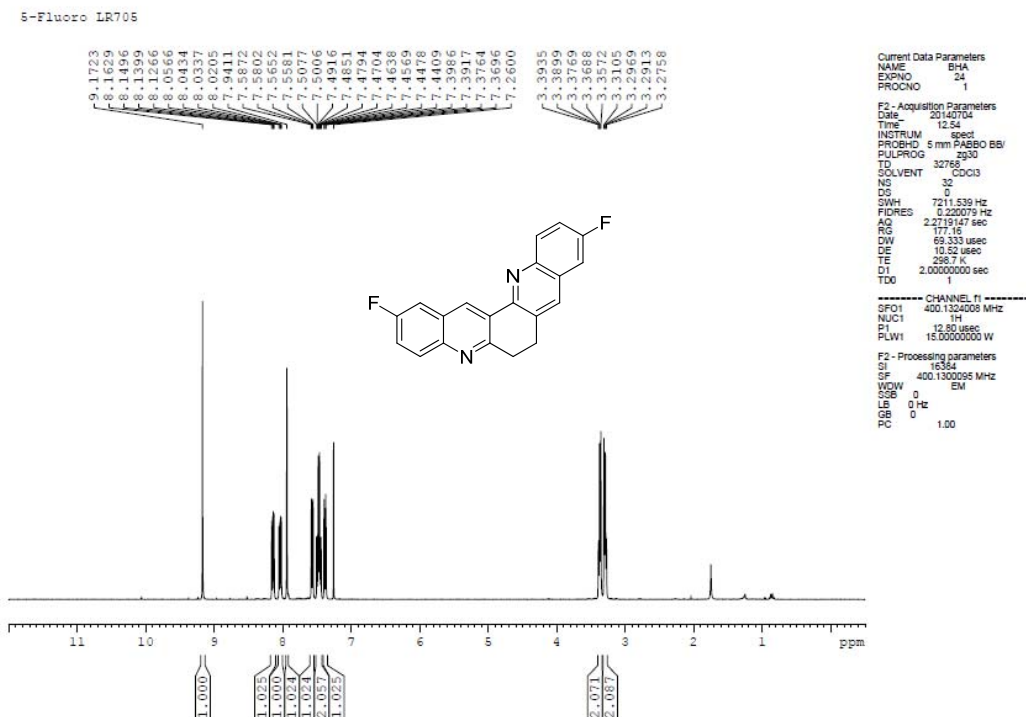

**2,10-difluoro-6,7-dihydrodibenzo[b,j][1,7]phenanthroline (4t) : <sup>13</sup>C NMR (100 MHz, CDCl<sub>3</sub>)**

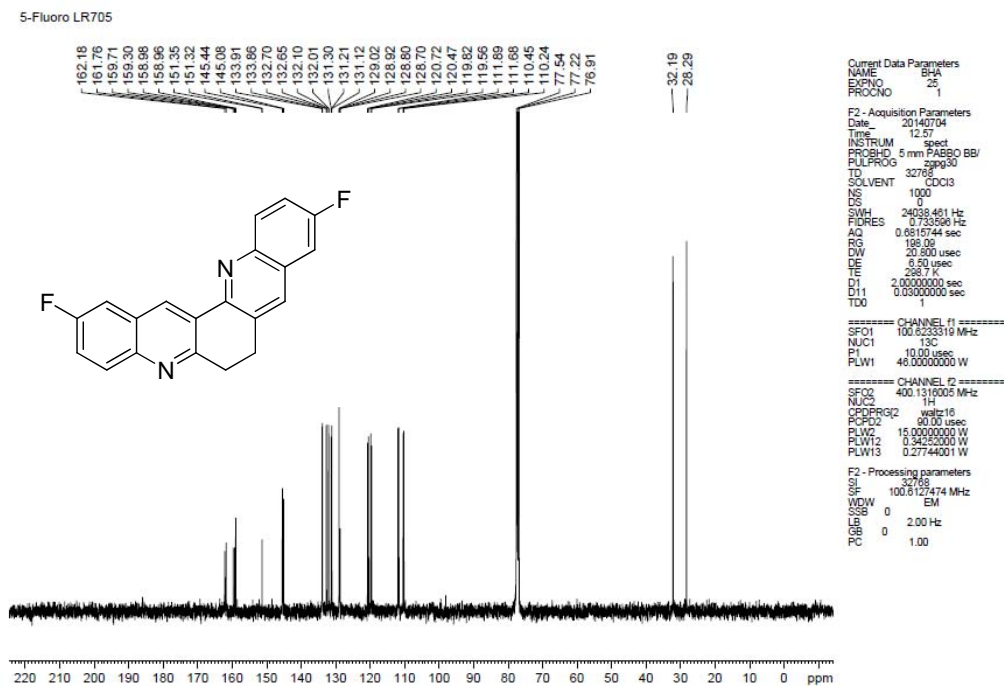

**2,10-difluoro-6,7-dihydrodibenzo[b,j][1,7]phenanthroline (4t) : HRMS**

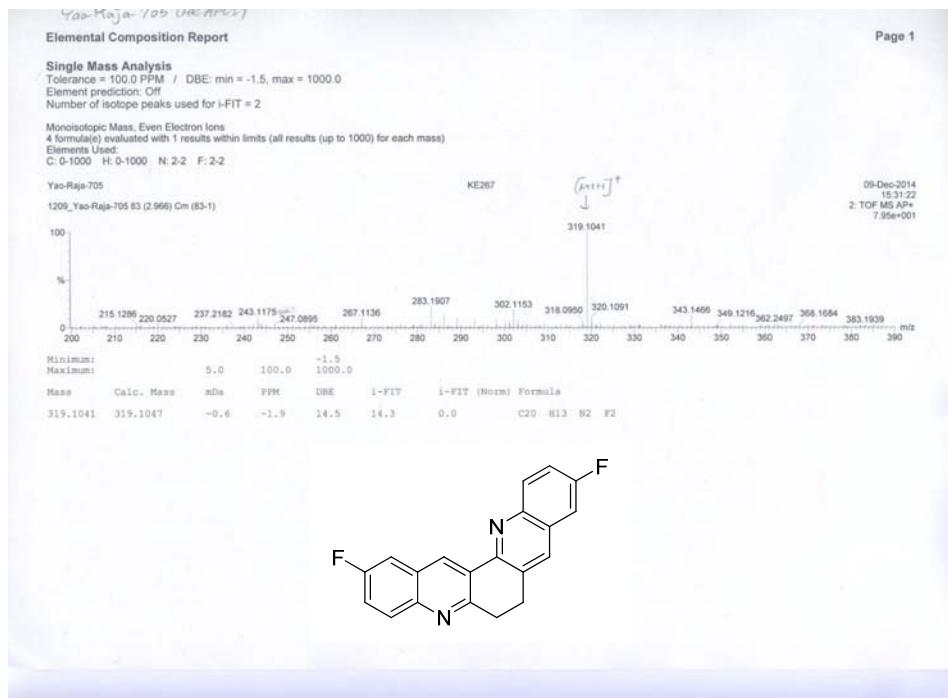

**21. 2,10-dichloro-6,7-dihydrodibenzo[b,j][1,7]phenanthroline (4u) : <sup>1</sup>H NMR (400 MHz, CDCl<sub>3</sub>)**

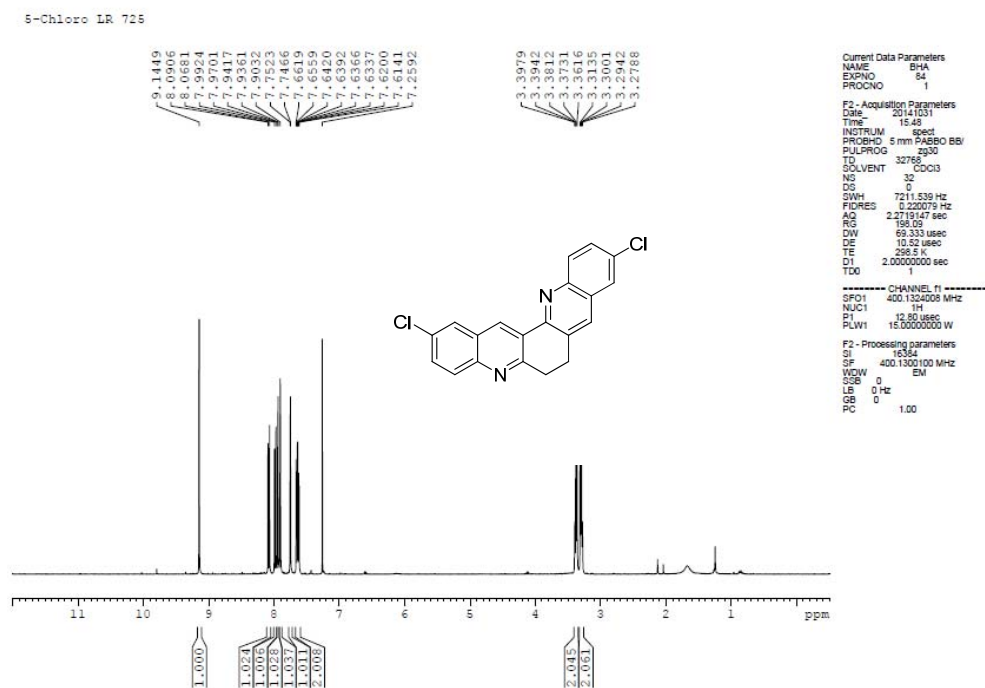

**2,10-dichloro-6,7-dihydrodibenzo[b,j][1,7]phenanthroline (4u) : <sup>13</sup>C NMR (100 MHz, CDCl<sub>3</sub>)**

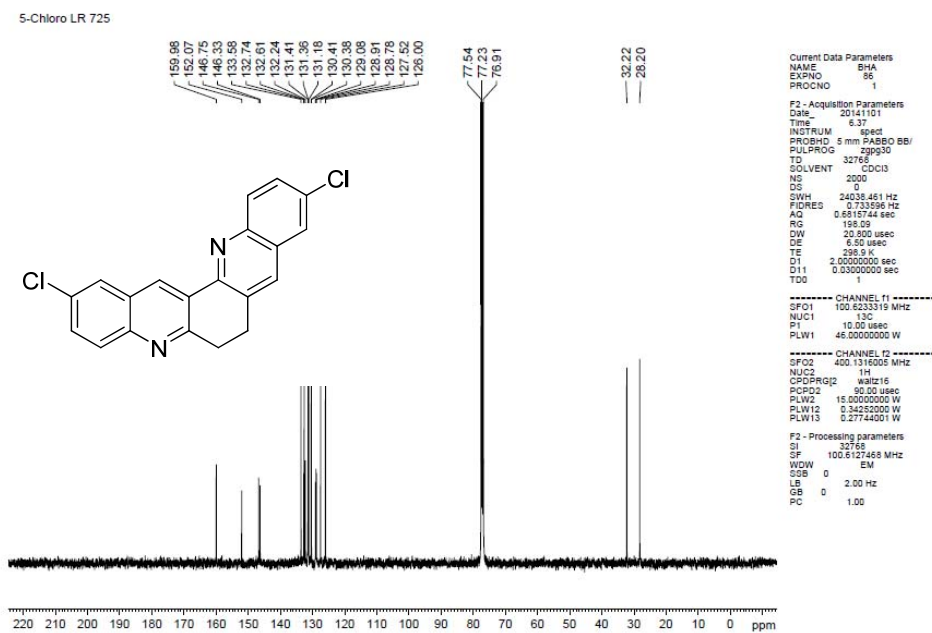

## 2,10-dichloro-6,7-dihydrodibenzo[b,j][1,7]phenanthroline (4u) : HRMS

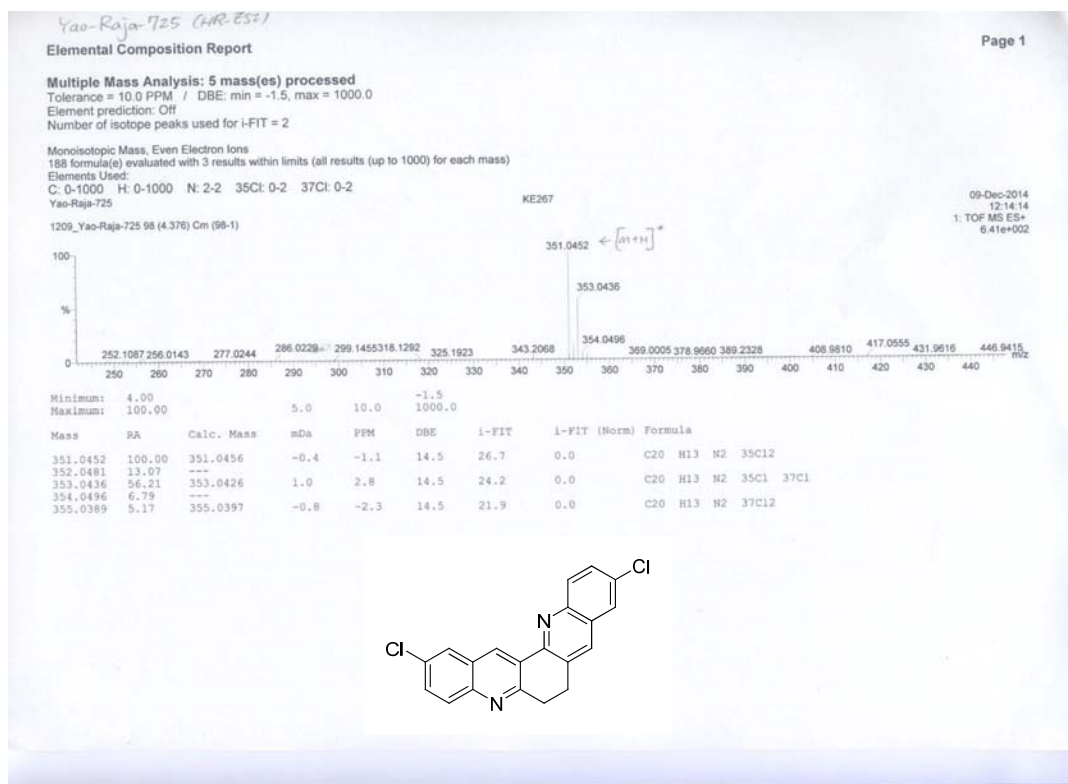

## 22. 2,10-dibromo-6,7-dihydrodibenzo[b,j][1,7]phenanthroline (4v) : <sup>1</sup>H NMR (400 MHz, CDCl<sub>3</sub>)

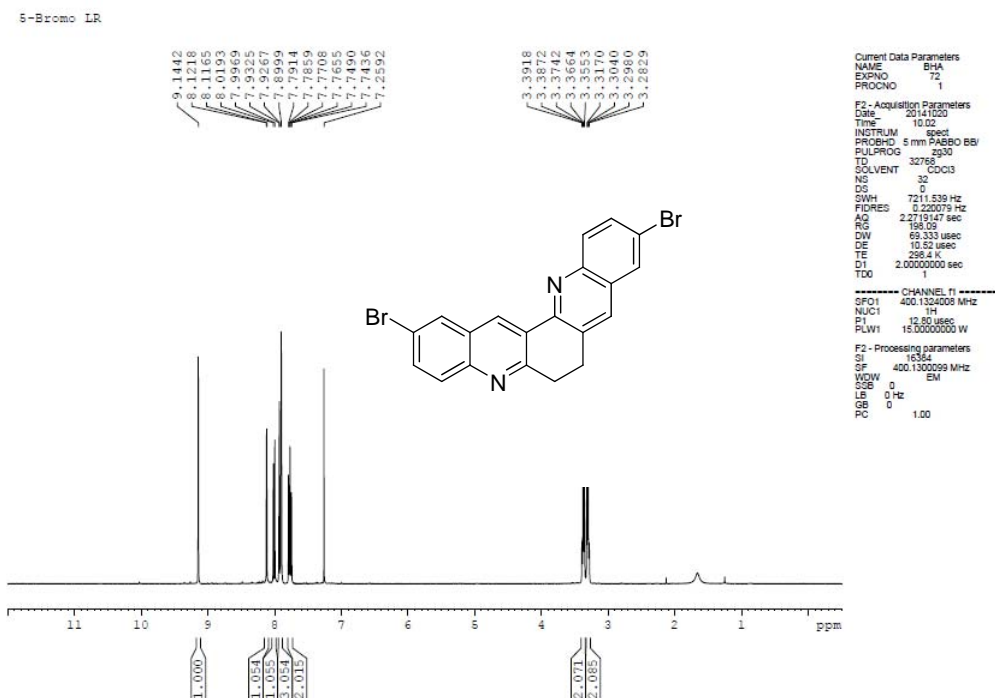

**2,10-dibromo-6,7-dihydrodibenzo[b,j][1,7]phenanthroline (4v) :  $^{13}\text{C}$  NMR (100 MHz,  $\text{CDCl}_3$ )**

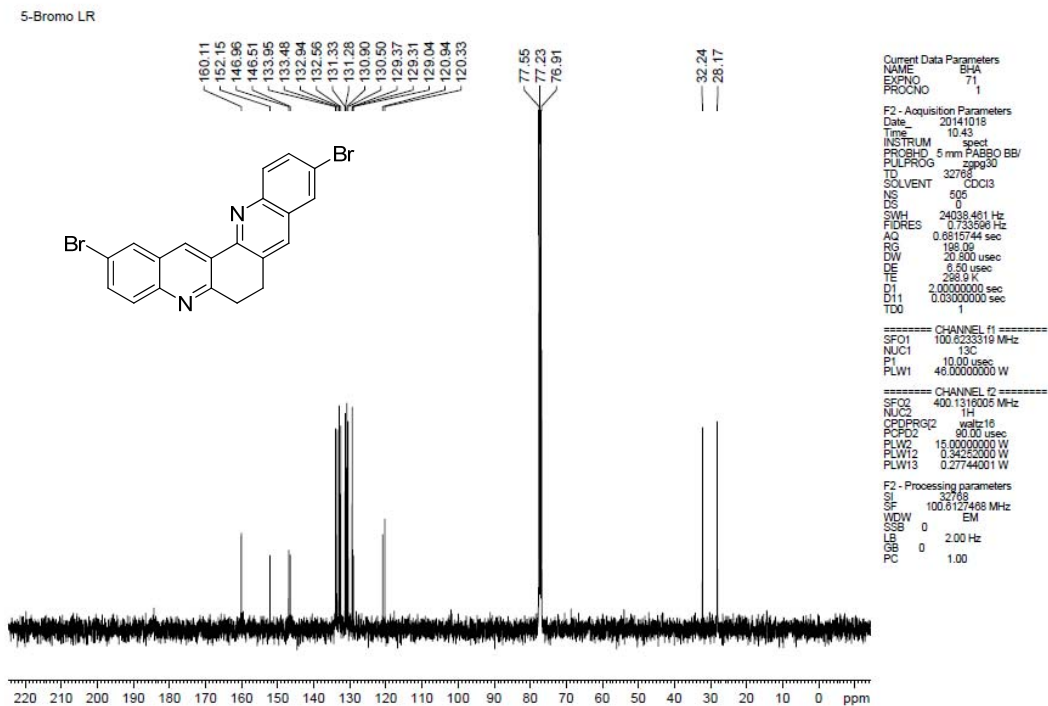

**2,10-dibromo-6,7-dihydrodibenzo[b,j][1,7]phenanthroline (4v) : HRMS**

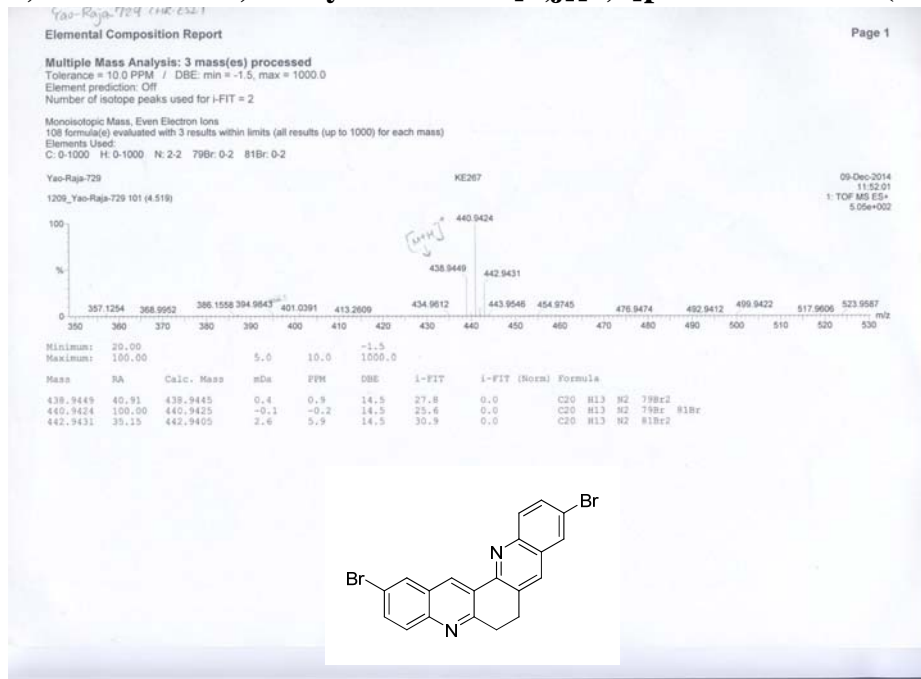

### 23. 2,10-dimethyl-6,7-dihydrodibenzo[b,j][1,7]phenanthroline(4w) : <sup>1</sup>H NMR (400 MHz, CDCl<sub>3</sub>)

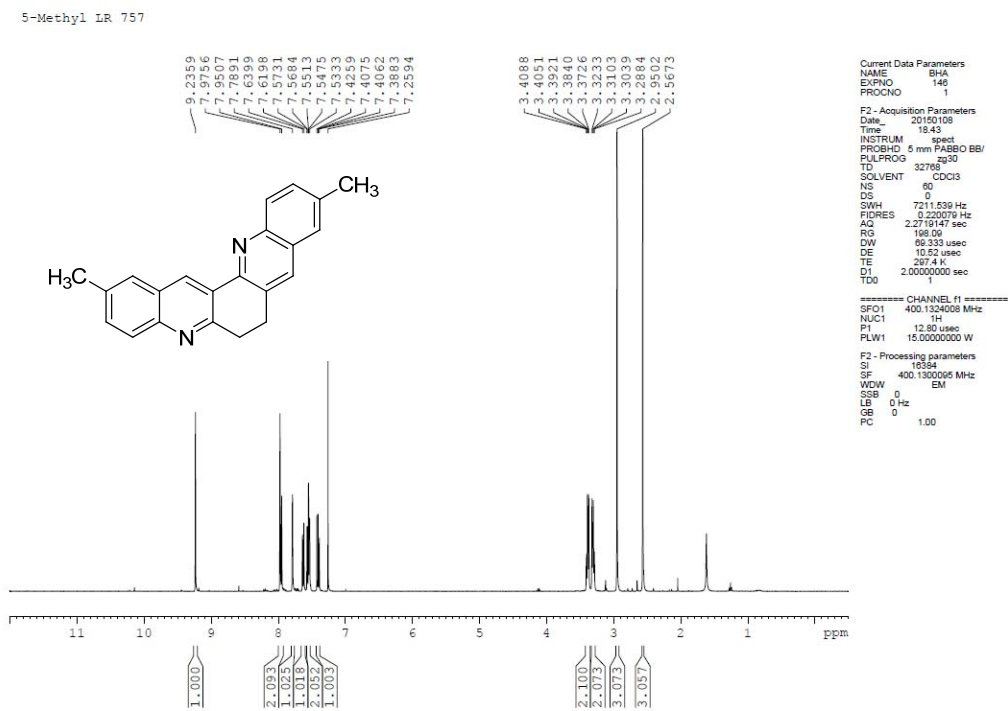

### 2,10-dimethyl-6,7-dihydrodibenzo[b,j][1,7]phenanthroline(4w) : <sup>13</sup>C NMR (100 MHz, CDCl<sub>3</sub>)

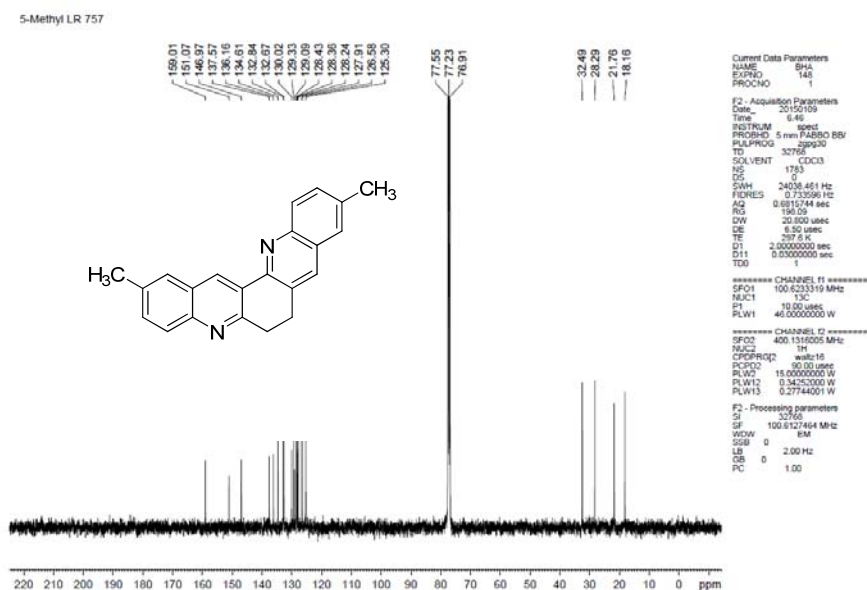

**2,10-dimethyl-6,7-dihydrodibenzo[b,j][1,7]phenanthroline(4w) : HRMS**

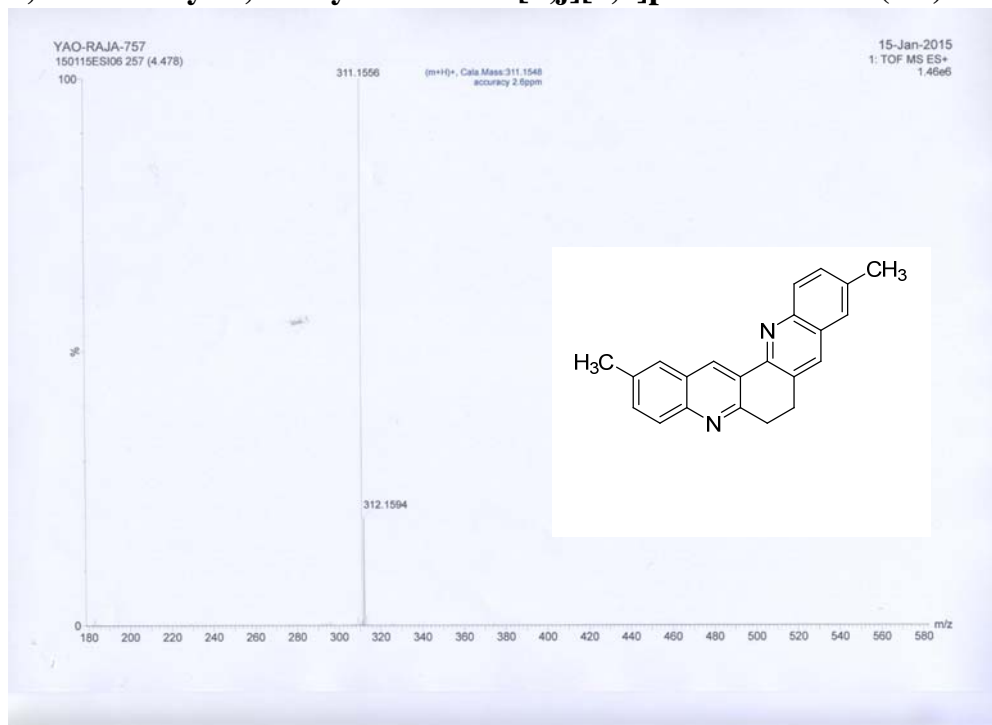

**24. 6,7-dihydro-[1,3]dioxolo[4',5':4,5]benzo[1,2-b][1,3]dioxolo[4',5':4,5]benzo[1,2-j][1,7]phenanthroline (4x) : <sup>1</sup>H NMR (400 MHz, CDCl<sub>3</sub>)**

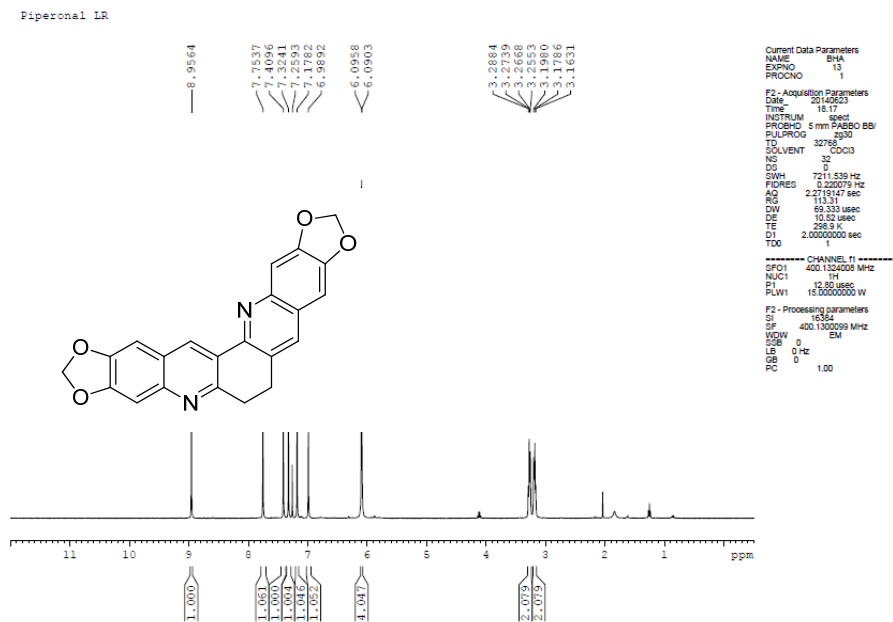



**6,7-dihydro-[1,3]dioxolo[4',5':4,5]benzo[1,2-b][1,3]dioxolo[4',5':4,5]benzo[1,2-j][1,7]phenanthroline (4x) : <sup>13</sup>C NMR (100 MHz, CDCl<sub>3</sub>)**

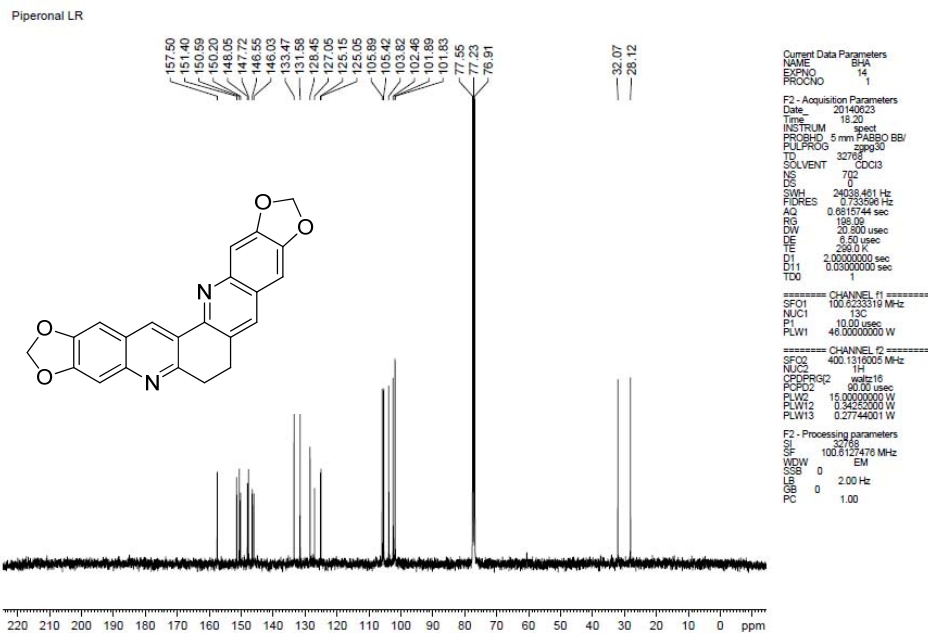

**6,7-dihydro-[1,3]dioxolo[4',5':4,5]benzo[1,2-b][1,3]dioxolo[4',5':4,5]benzo[1,2-j][1,7]phenanthroline (4x) : HRMS**

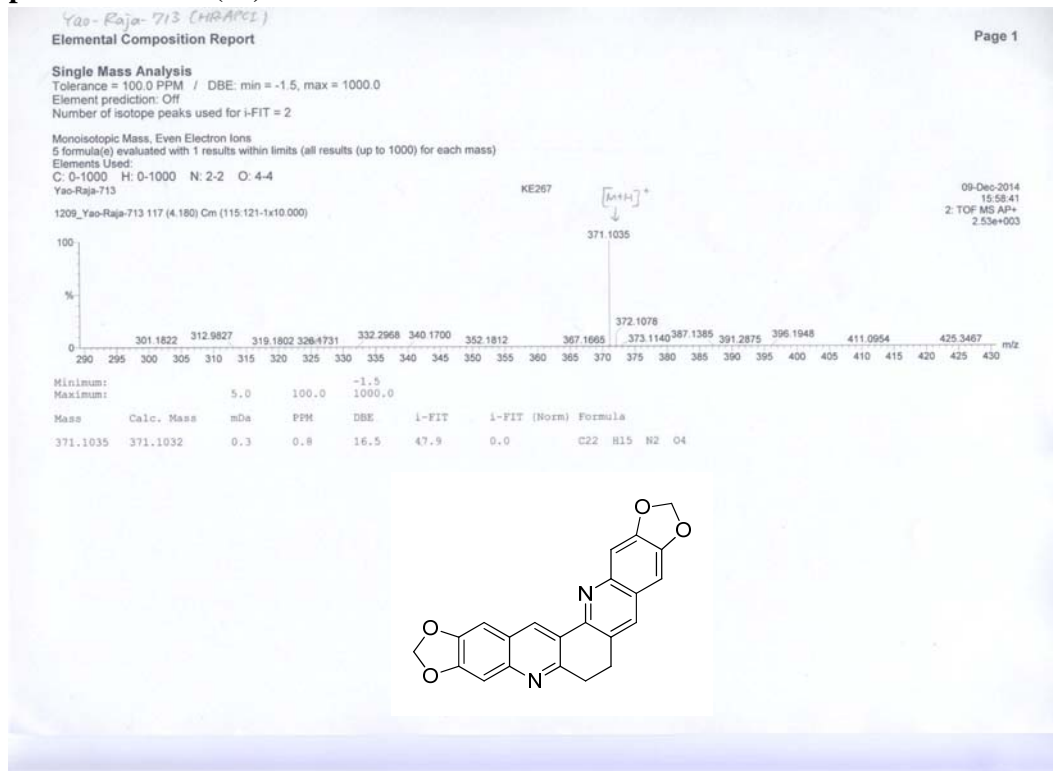

**25. 10-bromo-2-chloro-6,7-dihydrodibenzo[b,j][1,7]phenanthroline (4y) : <sup>1</sup>H NMR (400 MHz, CDCl<sub>3</sub>)**

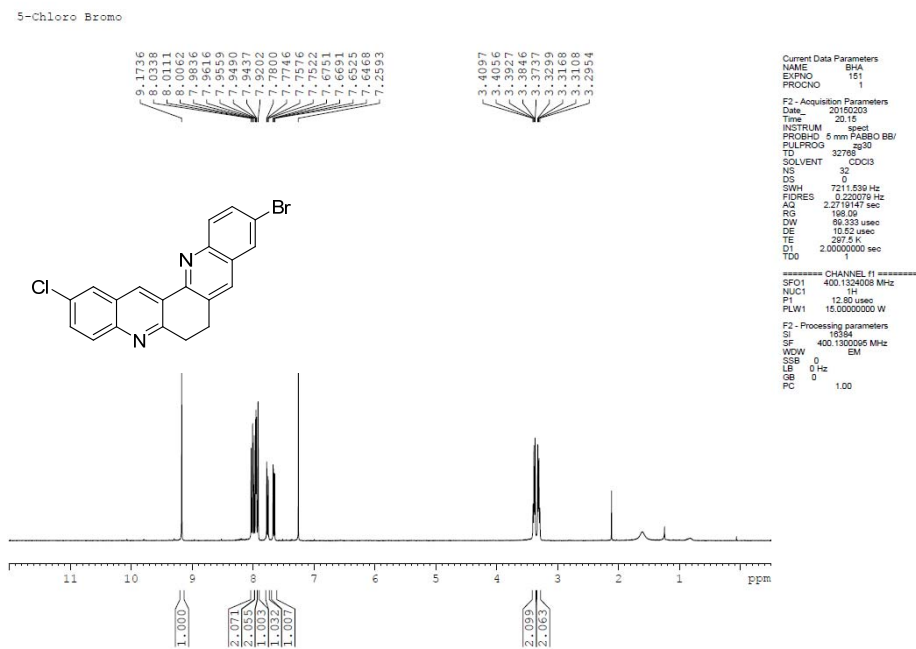

**10-bromo-2-chloro-6,7-dihydrodibenzo[b,j][1,7]phenanthroline (4y) : <sup>13</sup>C NMR (100 MHz, CDCl<sub>3</sub>)**

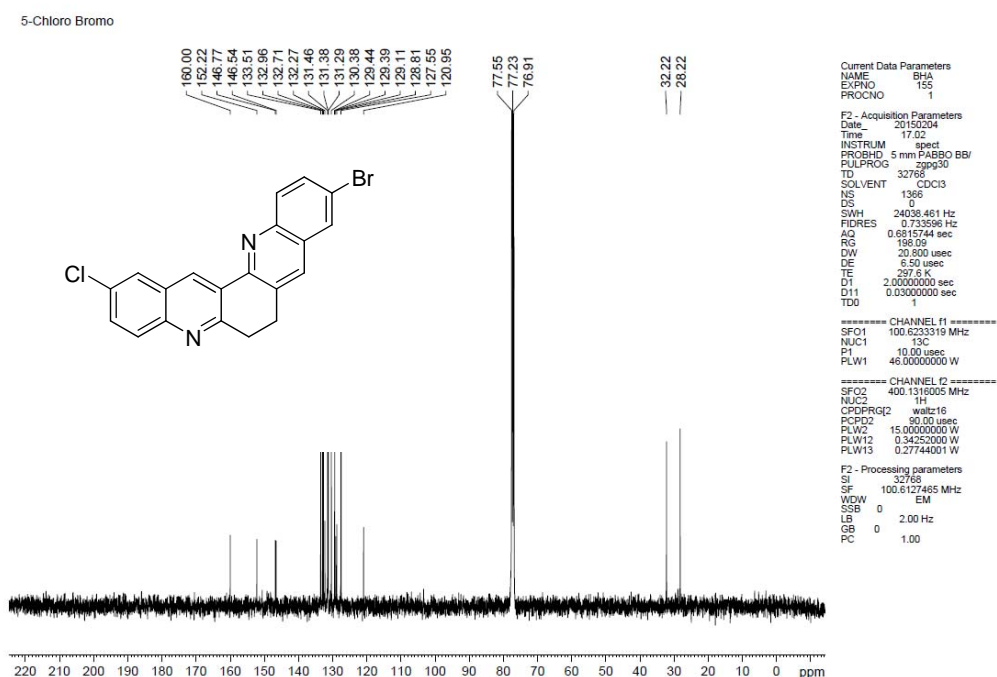

**10-bromo-2-chloro-6,7-dihydrodibenzo[b,j][1,7]phenanthroline (4y) : HRMS**

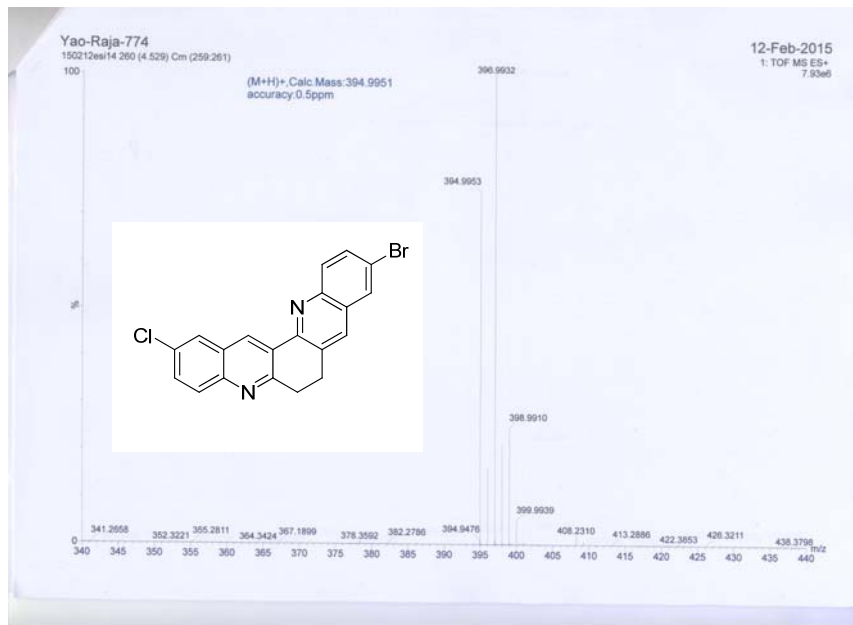

**26. 7,7-dimethyl-6,7-dihydrodibenzo[b,j][1,7]phenanthroline (4z) : <sup>1</sup>H NMR (400 MHz, CDCl<sub>3</sub>)**

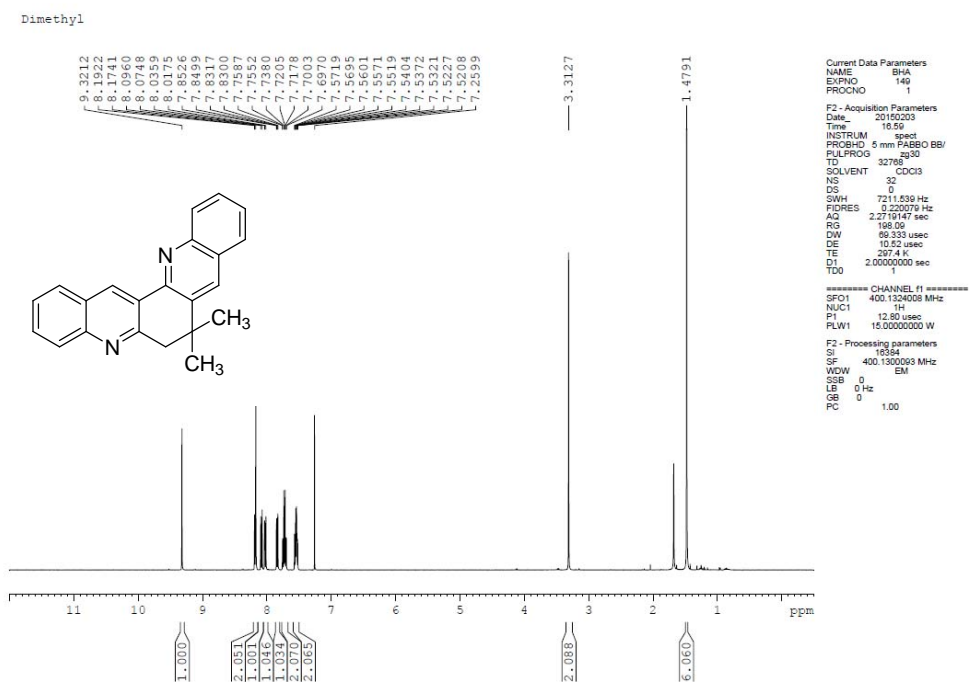

**7,7-dimethyl-6,7-dihydrodibenzo[b,j][1,7]phenanthroline (4z) :  $^{13}\text{C}$  NMR (100 MHz,  $\text{CDCl}_3$ )**

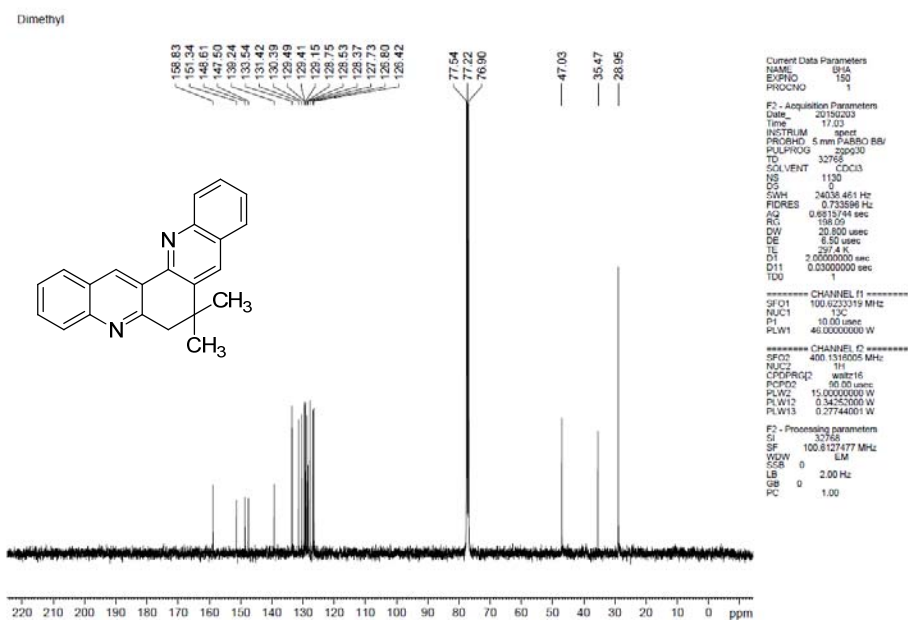

**7,7-dimethyl-6,7-dihydrodibenzo[b,j][1,7]phenanthroline (4z) : HRMS**

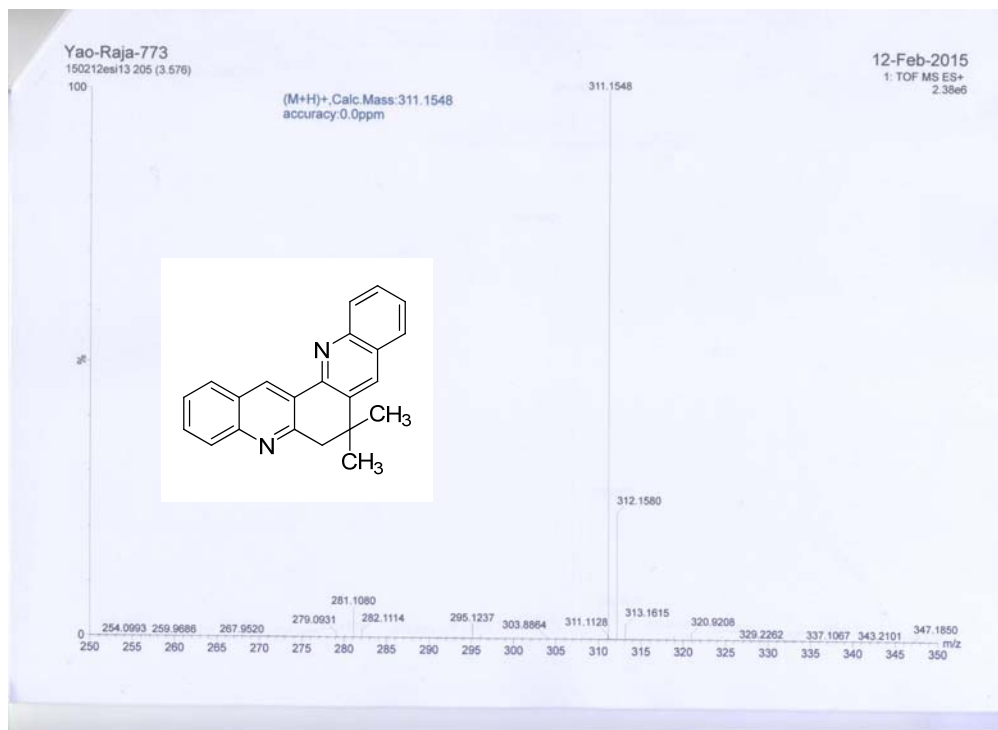

**27. 2-(phenylethynyl)-6,7-dihydrodibenzo[b,j][1,7]phenanthroline (5a) : <sup>1</sup>H NMR (400 MHz, CDCl<sub>3</sub>)**

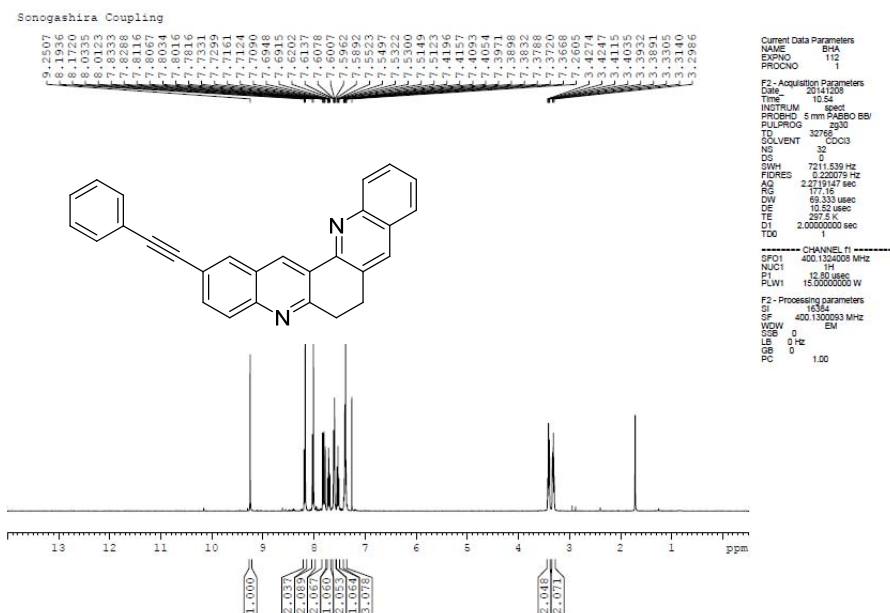

**2-(phenylethynyl)-6,7-dihydrodibenzo[b,j][1,7]phenanthroline (5a) : <sup>13</sup>C NMR (100 MHz, CDCl<sub>3</sub>)**

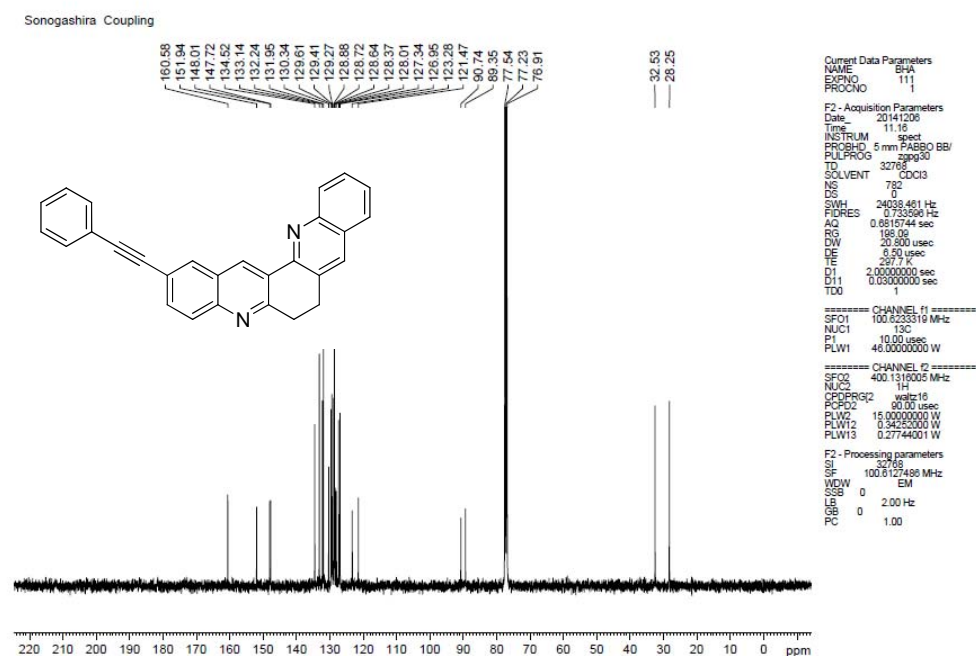

**2-(phenylethynyl)-6,7-dihydrodibenzo[b,j][1,7]phenanthroline (5a) : HRMS**

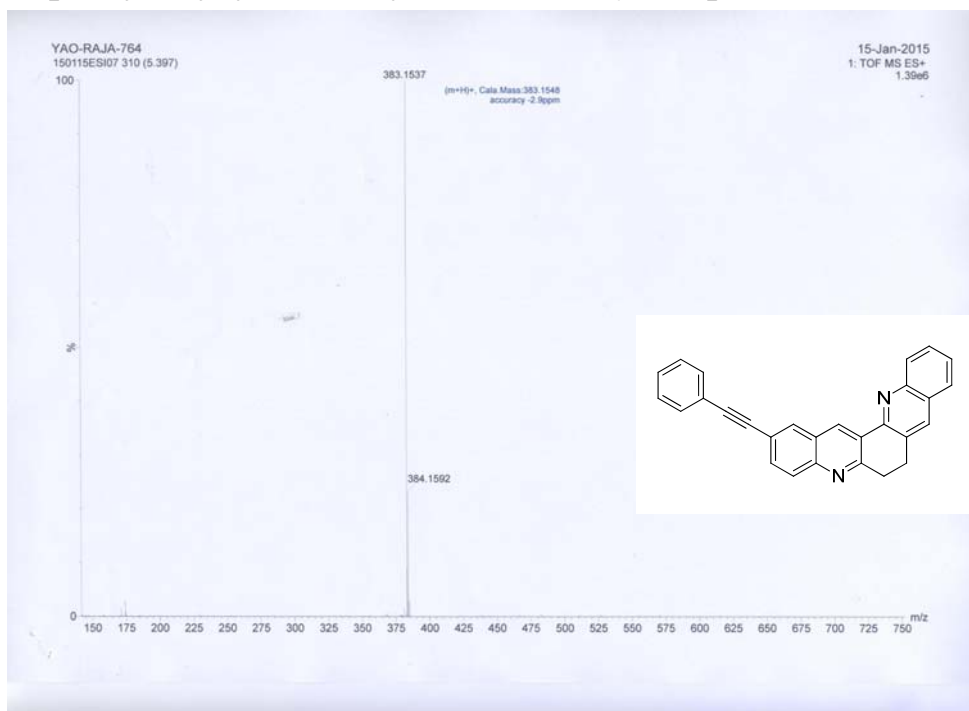

**28. 2-phenyl-6,7-dihydrodibenzo[b,j][1,7]phenanthroline (5b) : <sup>1</sup>H NMR (400 MHz, CDCl<sub>3</sub>)**

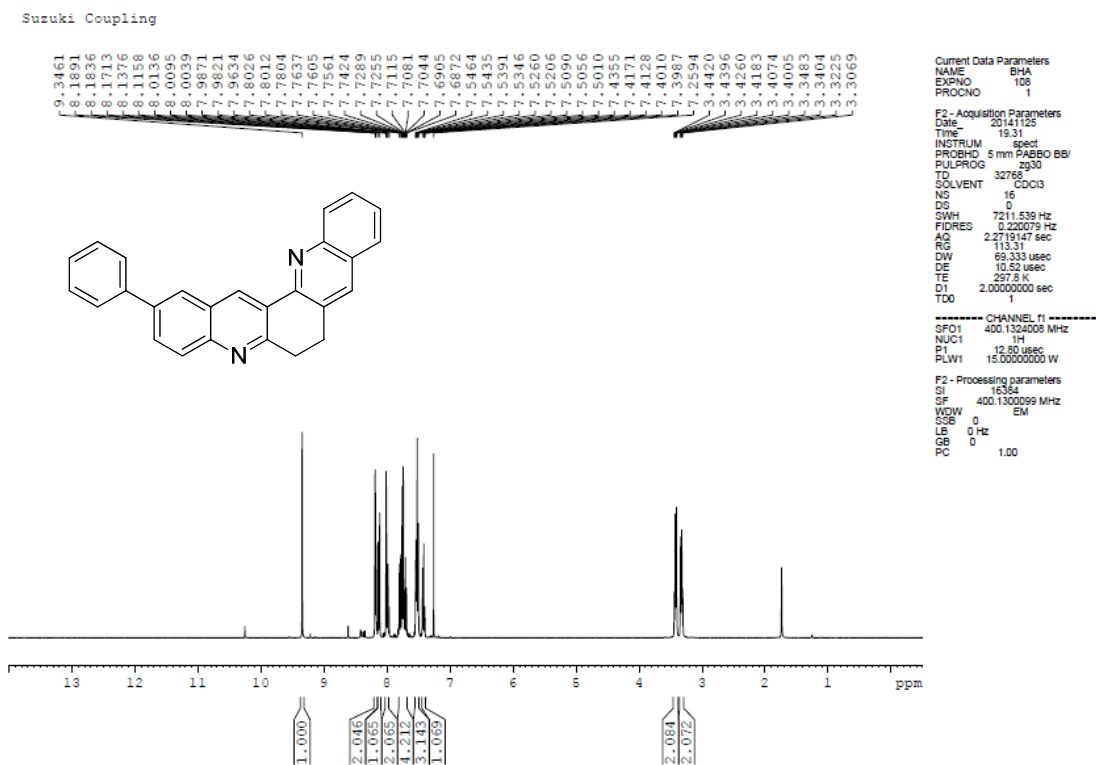

**2-phenyl-6,7-dihydrodibenzo[b,j][1,7]phenanthroline (5b) :  $^{13}\text{C}$  NMR (100 MHz,  $\text{CDCl}_3$ )**

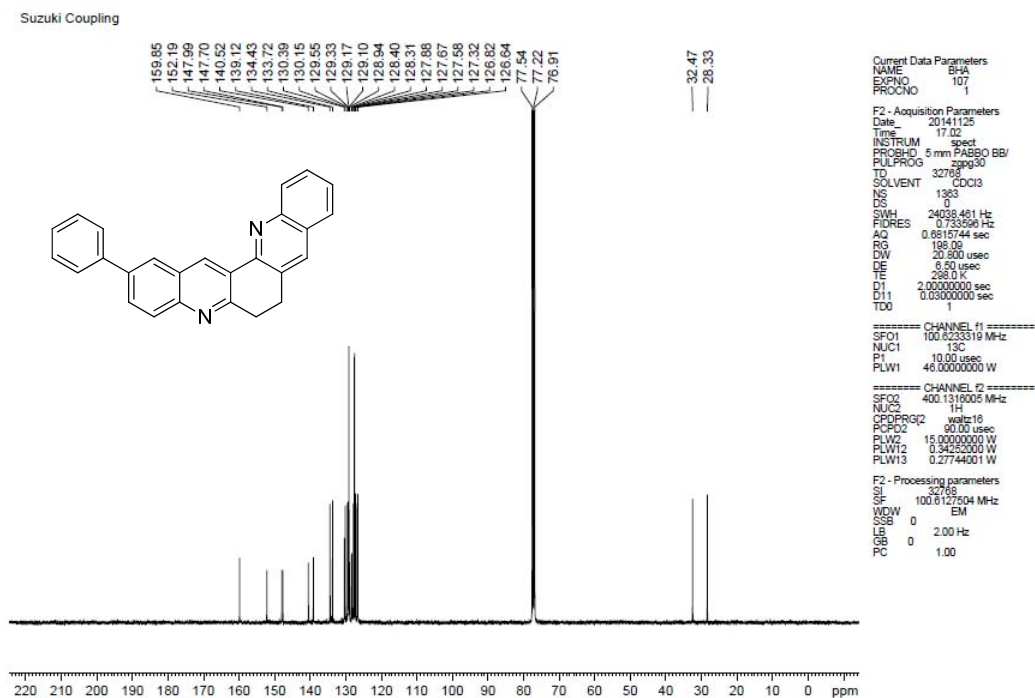

**2-phenyl-6,7-dihydrodibenzo[b,j][1,7]phenanthroline (5b) : HRMS**

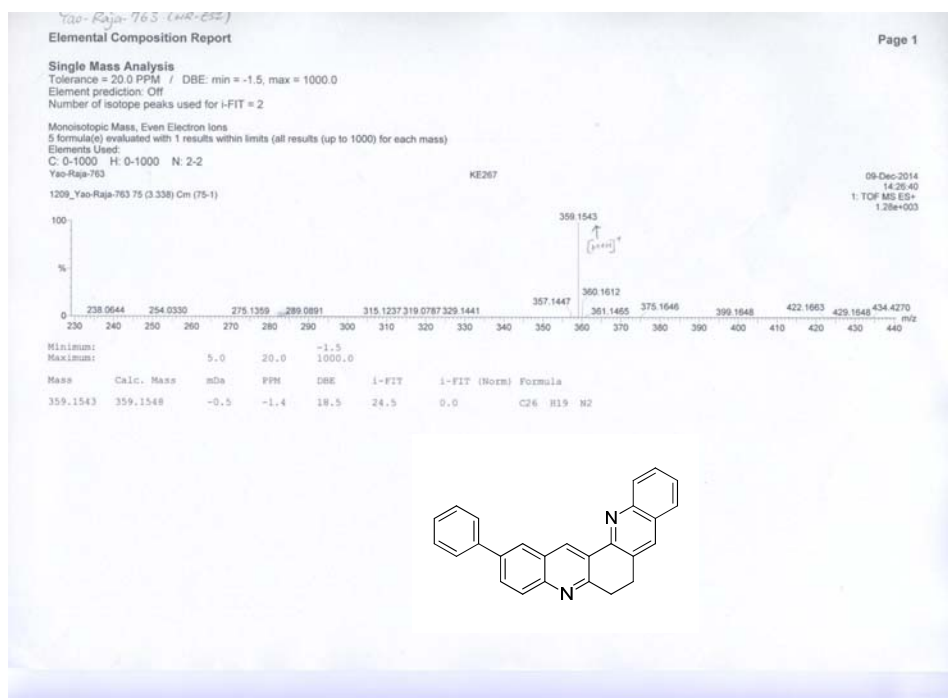

**29. 2-(4,4,5,5-tetramethyl-1,3,2-dioxaborolan-2-yl)-6,7-dihydrodibenzo[b,j][1,7]phenanthroline (5c) : <sup>1</sup>H NMR (400 MHz, CDCl<sub>3</sub>)**

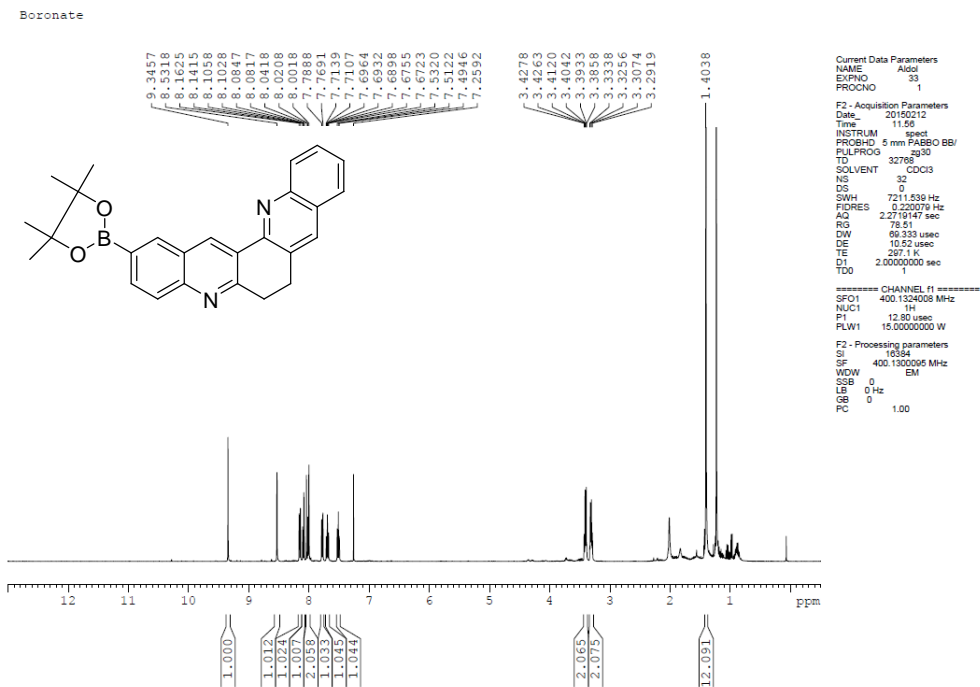

**2-(4,4,5,5-tetramethyl-1,3,2-dioxaborolan-2-yl)-6,7-dihydrodibenzo[b,j][1,7]phenanthroline (5c) : <sup>13</sup>C NMR (100 MHz, CDCl<sub>3</sub>)**

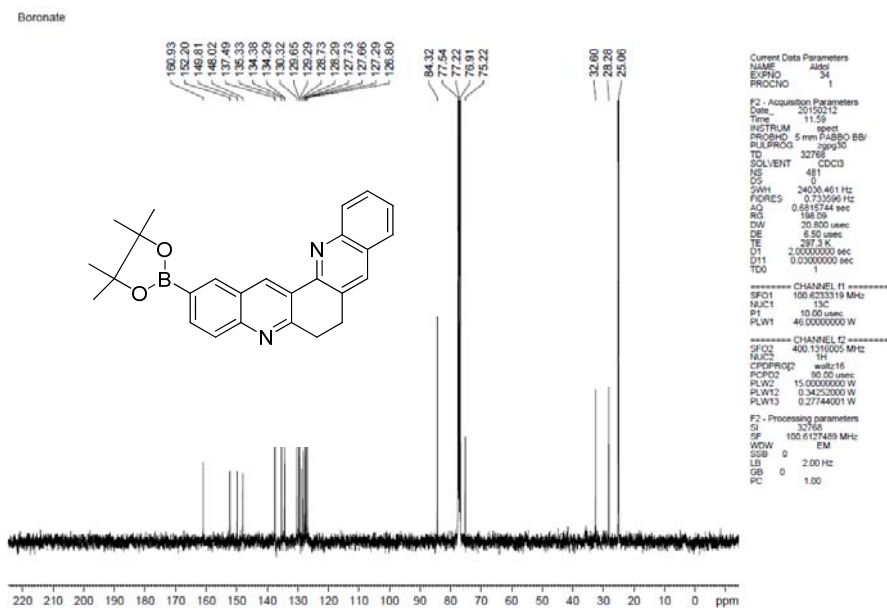



**2-(4,4,5,5-tetramethyl-1,3,2-dioxaborolan-2-yl)-6,7-dihydrodibenzo[b,j][1,7]phenanthroline (5c) : HRMS**

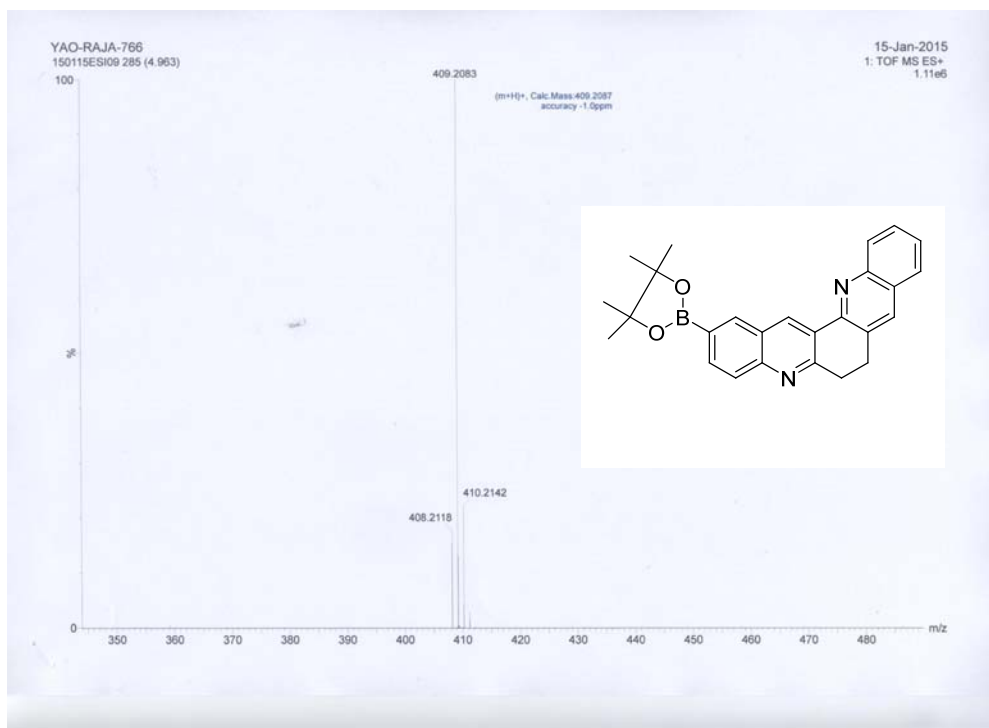

**30. 4-methyldibenzo[b,j][1,7]phenanthroline (5d) : <sup>1</sup>H NMR (400 MHz, CDCl<sub>3</sub>)**

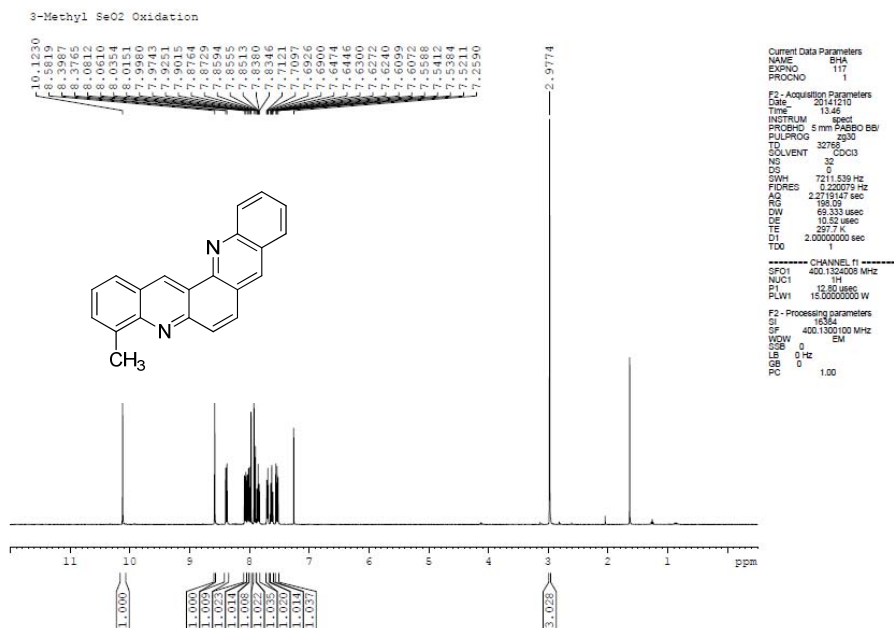

### 4-methyldibenzo[b,j][1,7]phenanthroline (5d) : $^{13}\text{C}$ NMR (100 MHz, $\text{CDCl}_3$ )

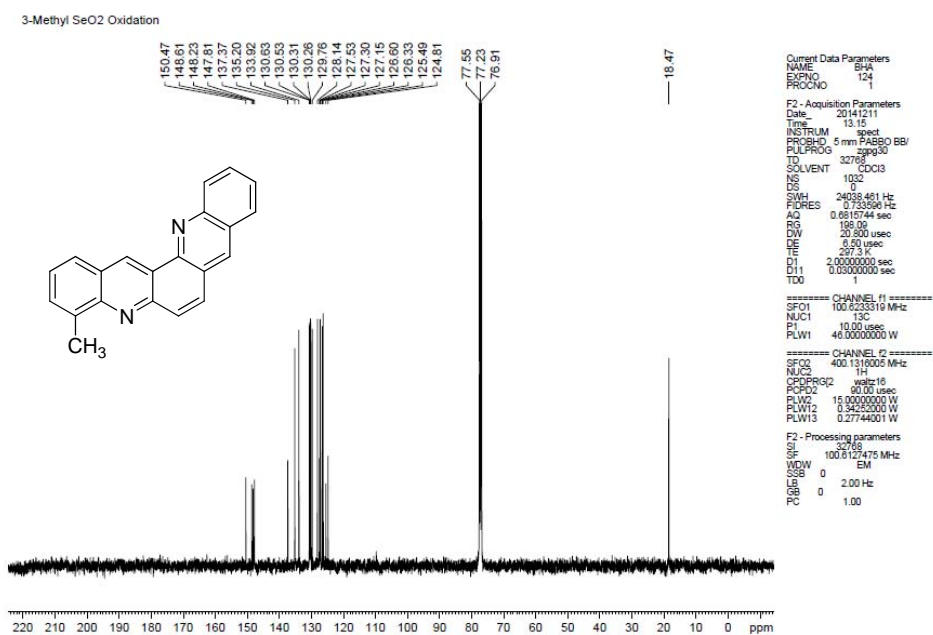

### 4-methyldibenzo[b,j][1,7]phenanthroline (5d) : HRMS

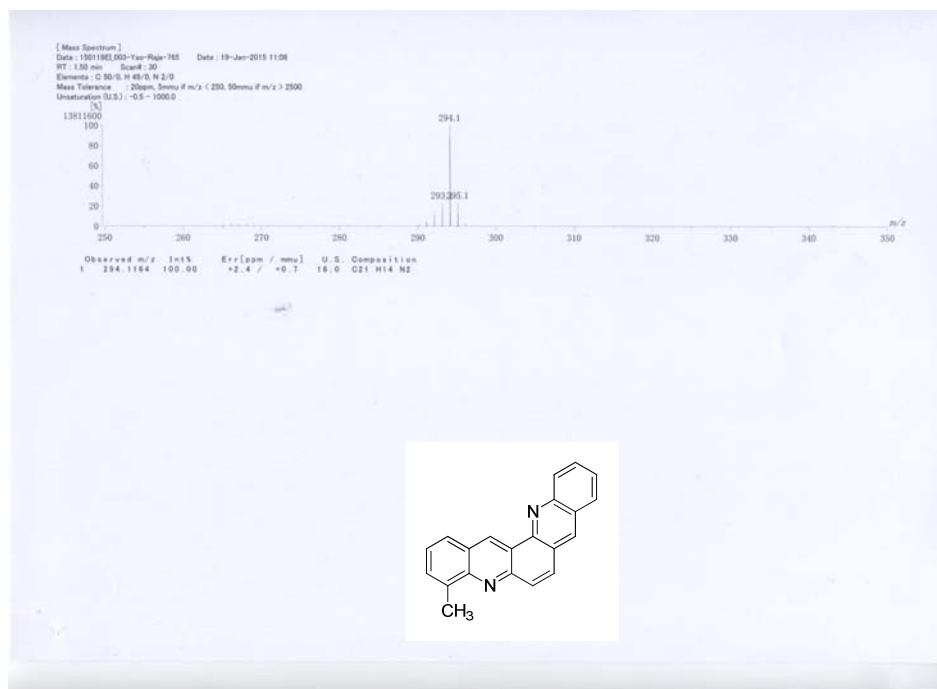

**31. 6-fluoro-6,7-dihydrodibenzo[b,j][1,7]phenanthroline (5e) :  $^1\text{H}$  NMR (400 MHz,  $\text{CDCl}_3$ )**

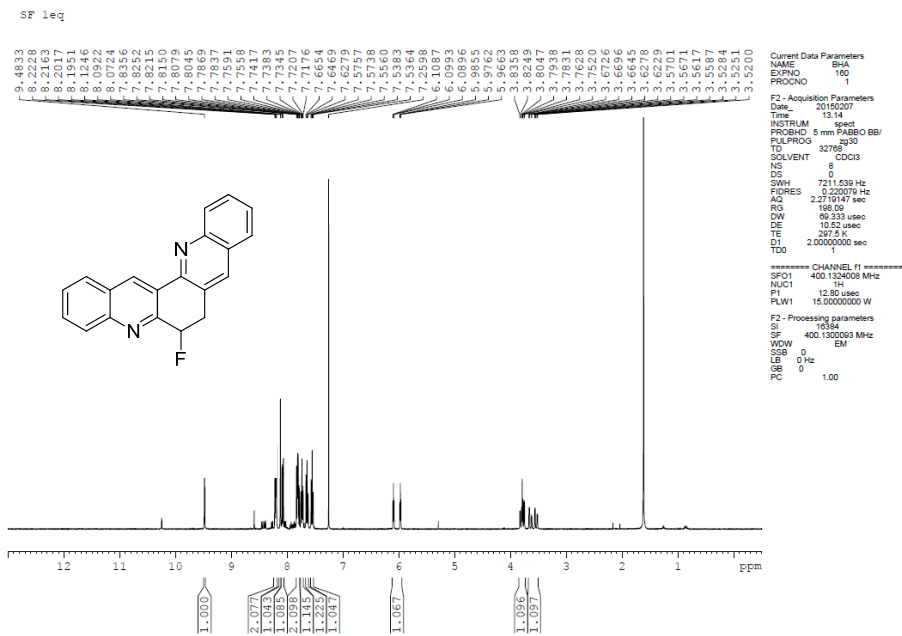

**6-fluoro-6,7-dihydrodibenzo[b,j][1,7]phenanthroline (5e) : HRMS**

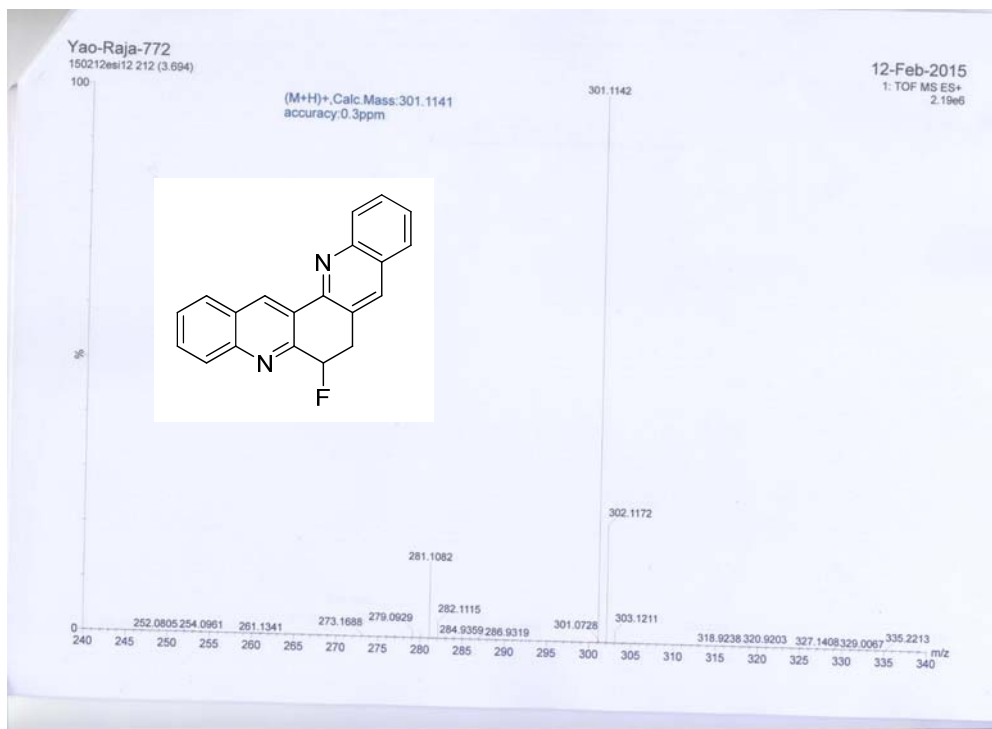

**32. 6-bromo-6,7-dihydrodibenzo[b,j][1,7]phenanthroline (5f) : <sup>1</sup>H NMR (400 MHz, CDCl<sub>3</sub>)**

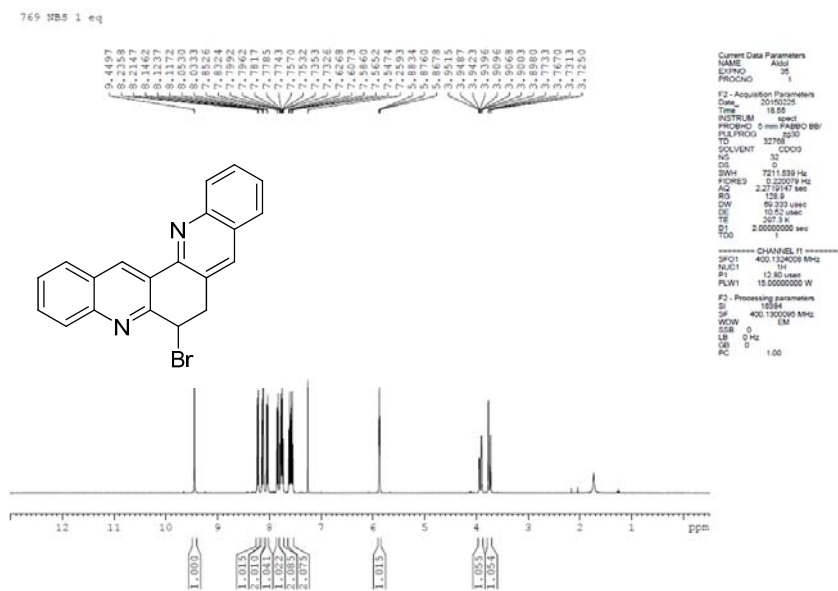

**6-bromo-6,7-dihydrodibenzo[b,j][1,7]phenanthroline (5f) :  $^{13}\text{C}$  NMR (100 MHz,  $\text{CDCl}_3$ )**

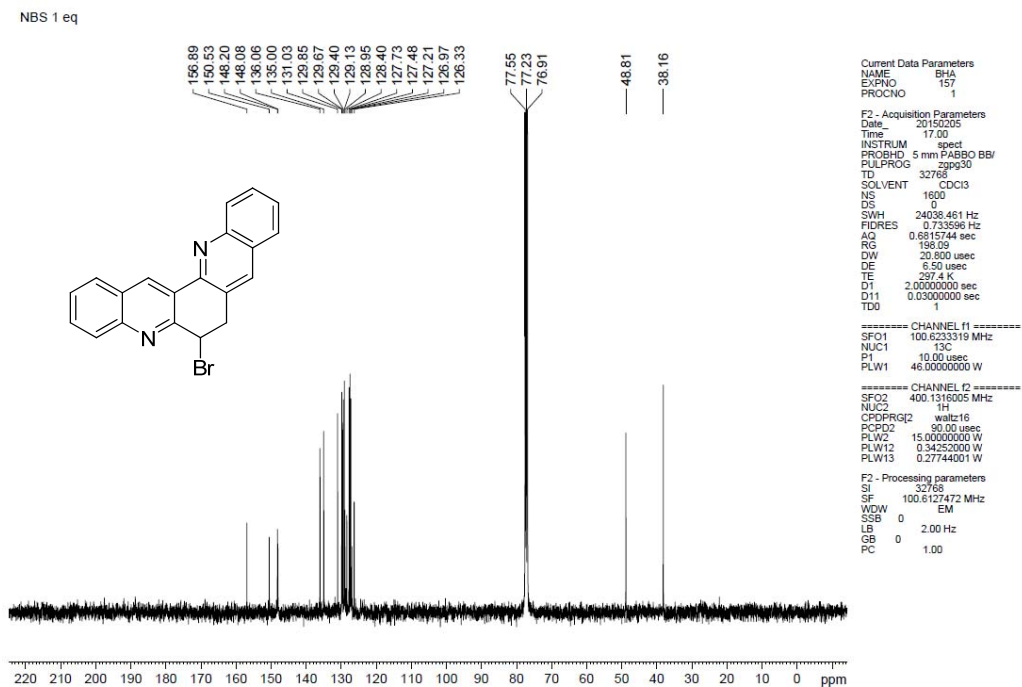

**6-bromo-6,7-dihydrodibenzo[b,j][1,7]phenanthroline (5f) : HRMS**

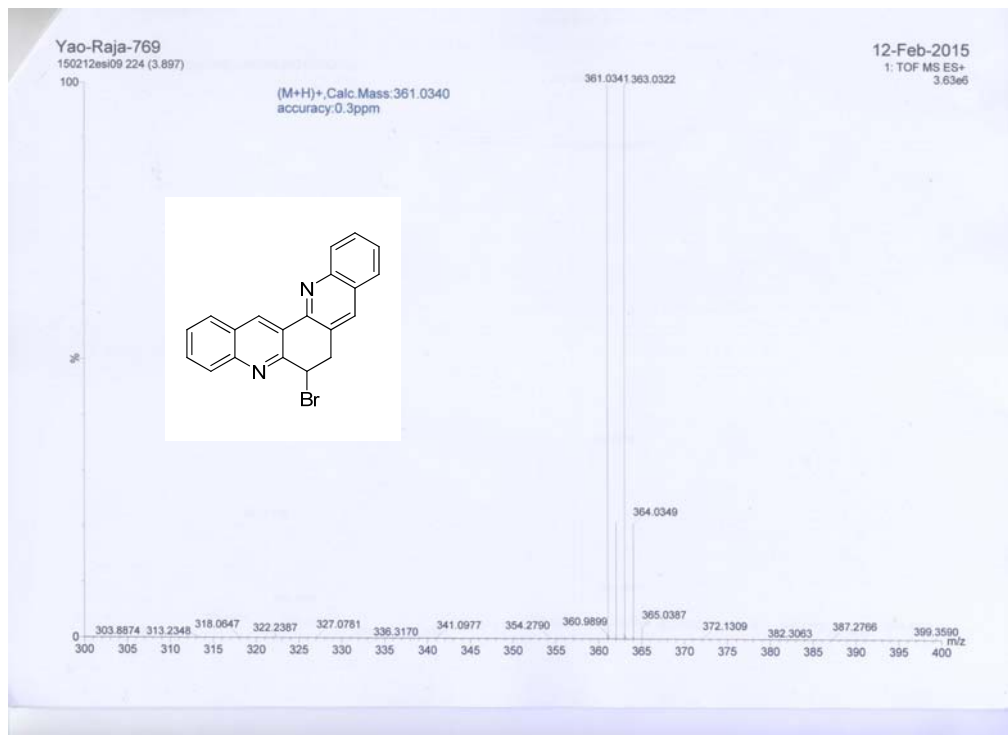

### 33. dibenzo[b,j][1,7]phenanthroline (5g) : <sup>1</sup>H NMR (400 MHz, CDCl<sub>3</sub>)

701 with NBS 2eq lower spot

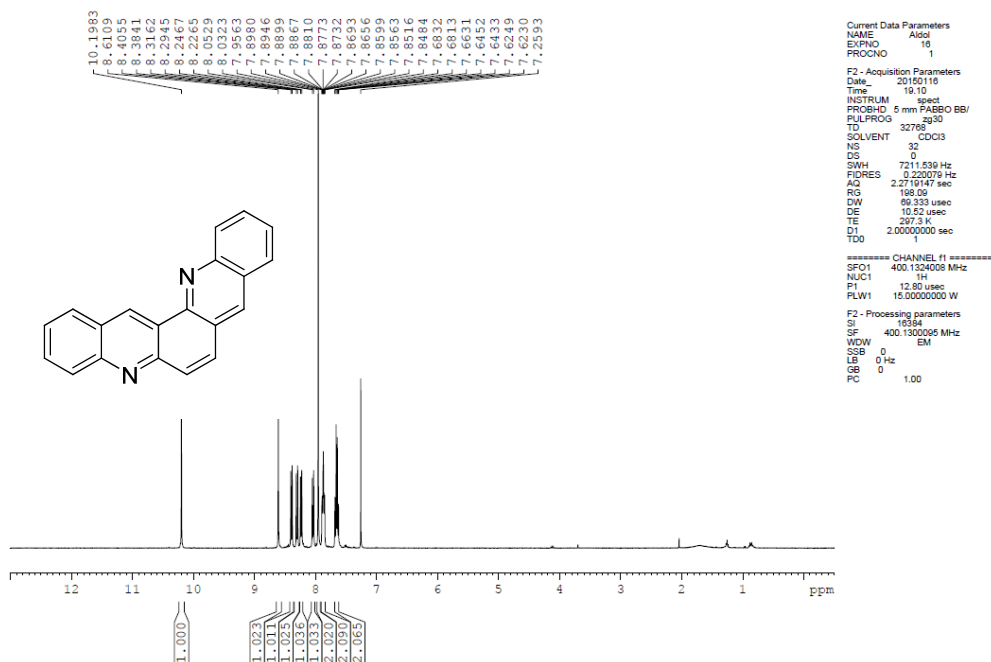

### dibenzo[b,j][1,7]phenanthroline (5g) : <sup>13</sup>C NMR (100 MHz, CDCl<sub>3</sub>)

701 with NBS 2eq lower spot

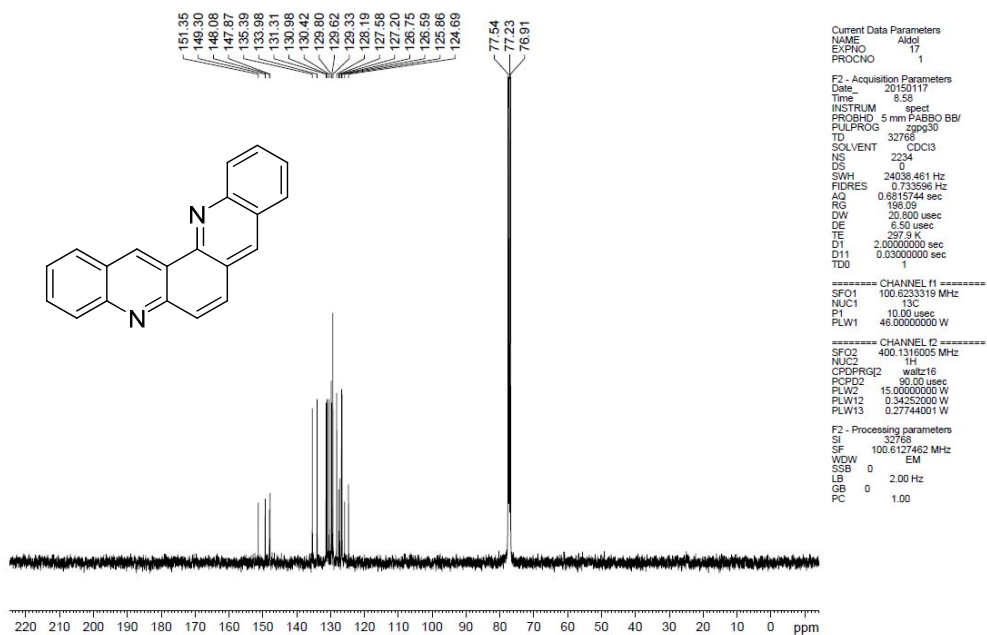

**dibenzo[b,j][1,7]phenanthroline (5g) : HRMS**

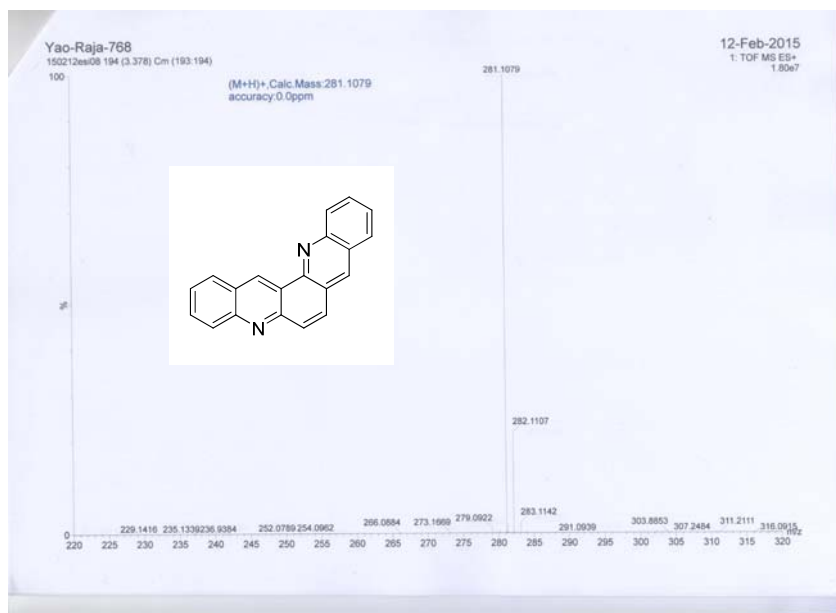

**34. 6-chloro-6,7-dihydrodibenzo[b,j][1,7]phenanthroline (5h) : <sup>1</sup>H NMR (400 MHz, CDCl<sub>3</sub>)**

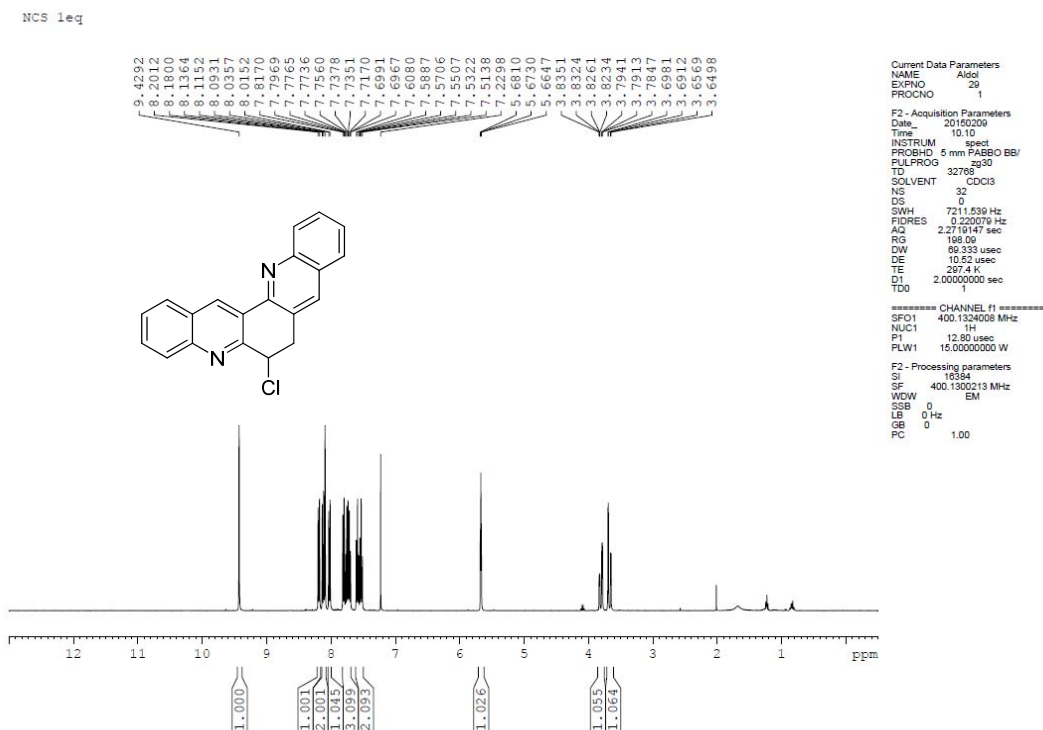

**6-chloro-6,7-dihydrodibenzo[b,j][1,7]phenanthroline (5h) : <sup>13</sup>C NMR (100 MHz, CDCl<sub>3</sub>)**

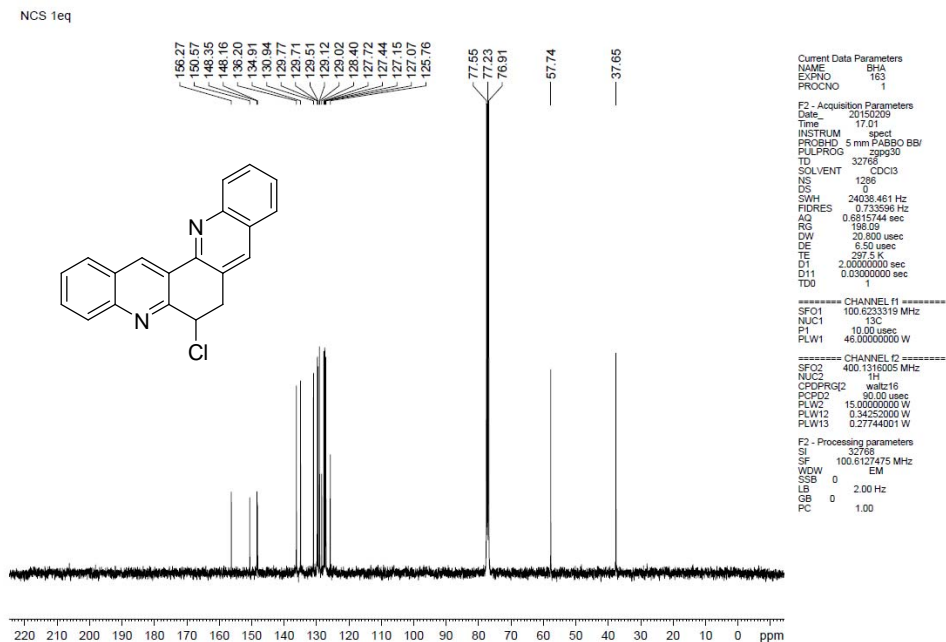

**6-chloro-6,7-dihydrodibenzo[b,j][1,7]phenanthroline (5h) : HRMS**

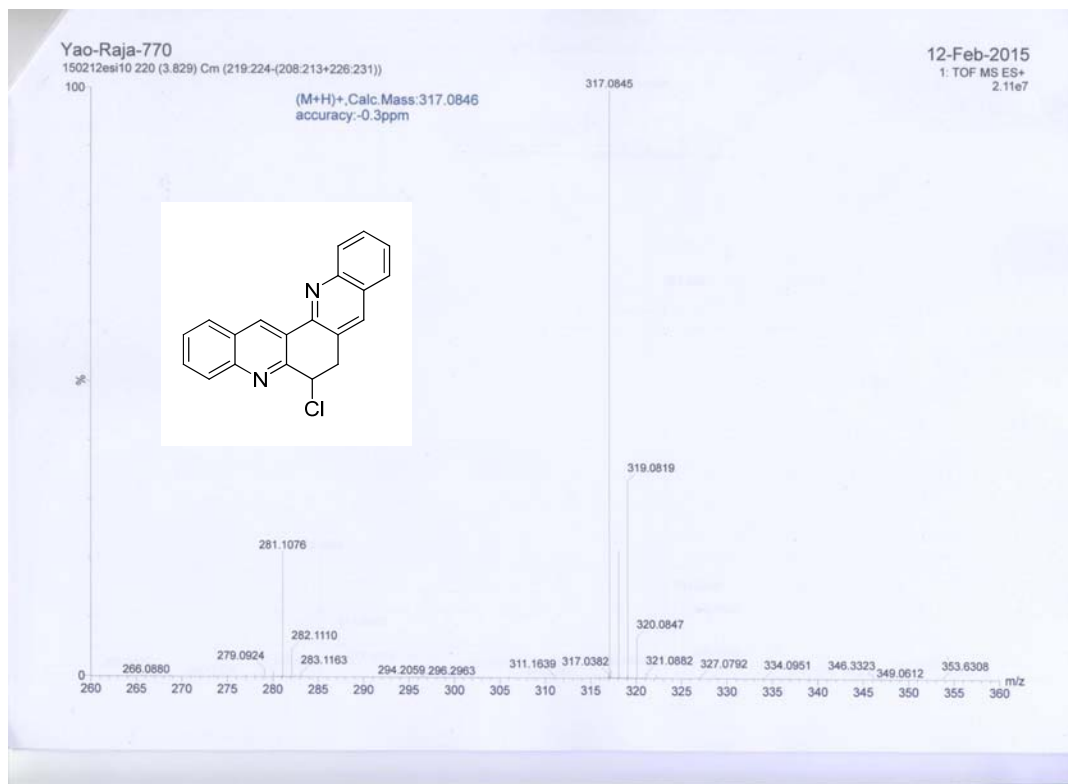



**35. 6,6-dichloro-6,7-dihydrodibenzo[b,j][1,7]phenanthroline (5i) : <sup>1</sup>H NMR (400 MHz, CDCl<sub>3</sub>)**

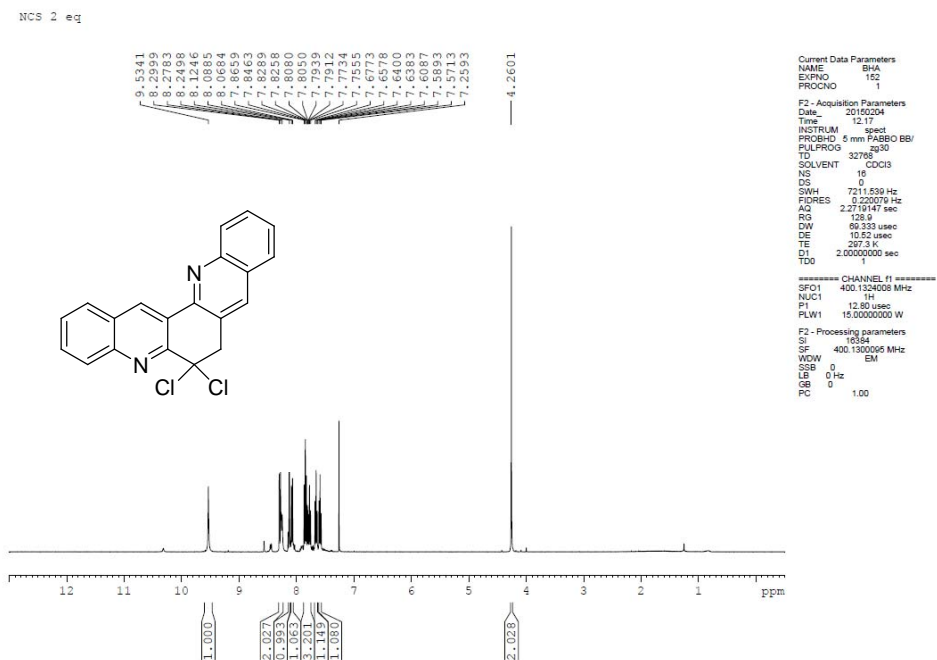

**6,6-dichloro-6,7-dihydrodibenzo[b,j][1,7]phenanthroline (5i) : <sup>13</sup>C NMR (100 MHz, CDCl<sub>3</sub>)**

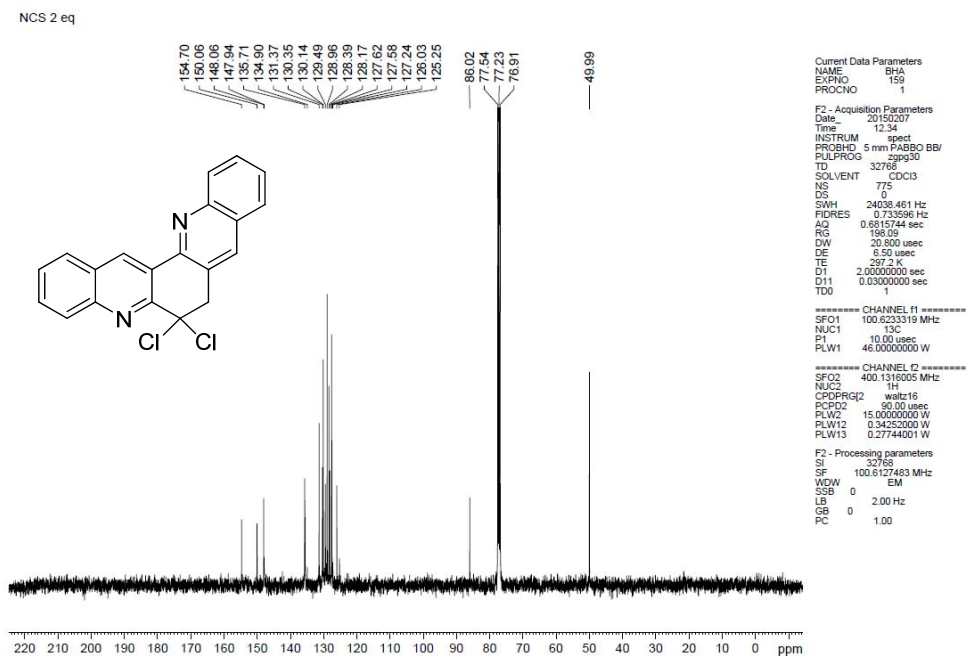

### 6,6-dichloro-6,7-dihydrobenzo[b,j][1,7]phenanthroline (5i) : HRMS

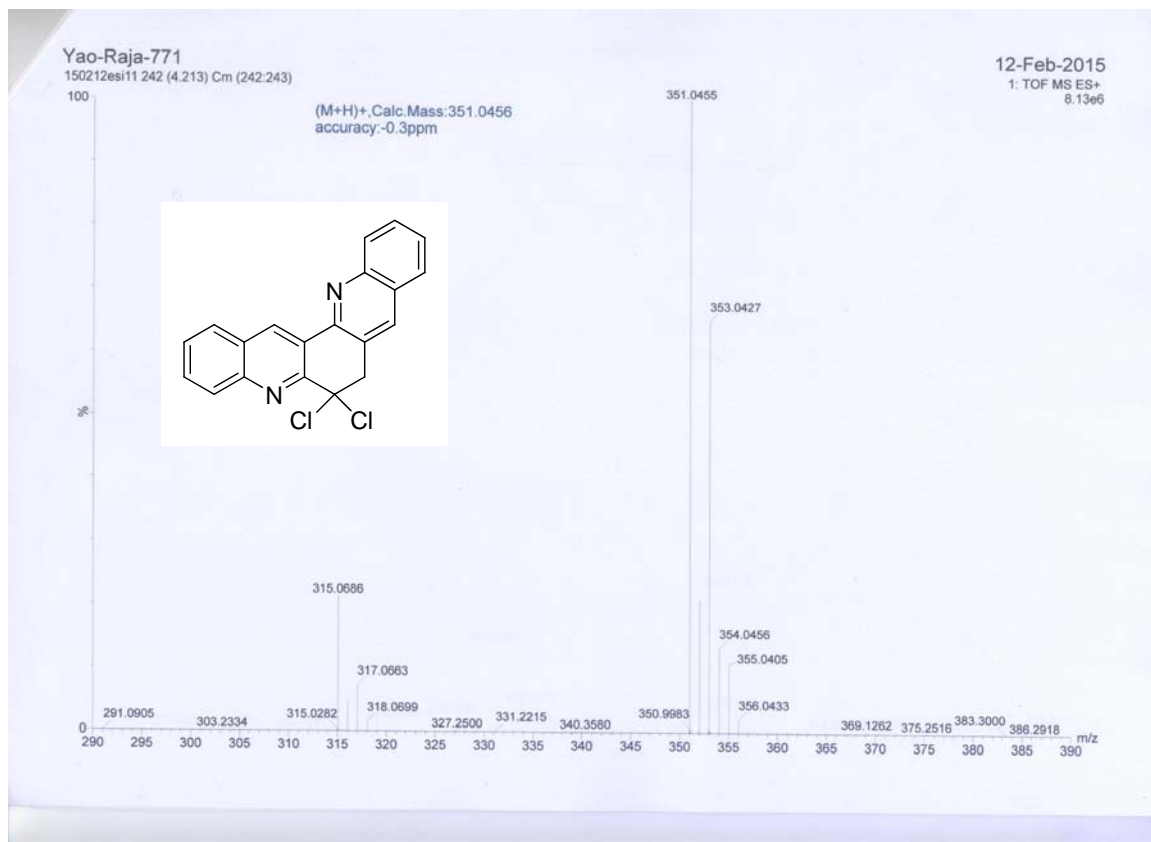

### 36. 6-bromodibenzo[b,j][1,7]phenanthroline (5j) : <sup>1</sup>H NMR (400 MHz, CDCl<sub>3</sub>)

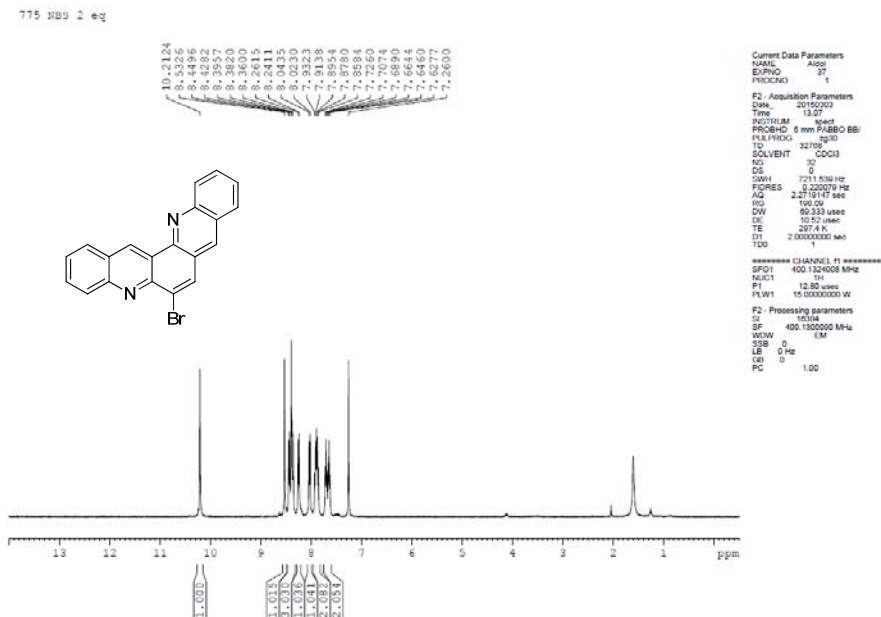

## 6-bromodibenzo[b,j][1,7]phenanthroline (5j) : $^{13}\text{C}$ NMR (100 MHz, $\text{CDCl}_3$ )

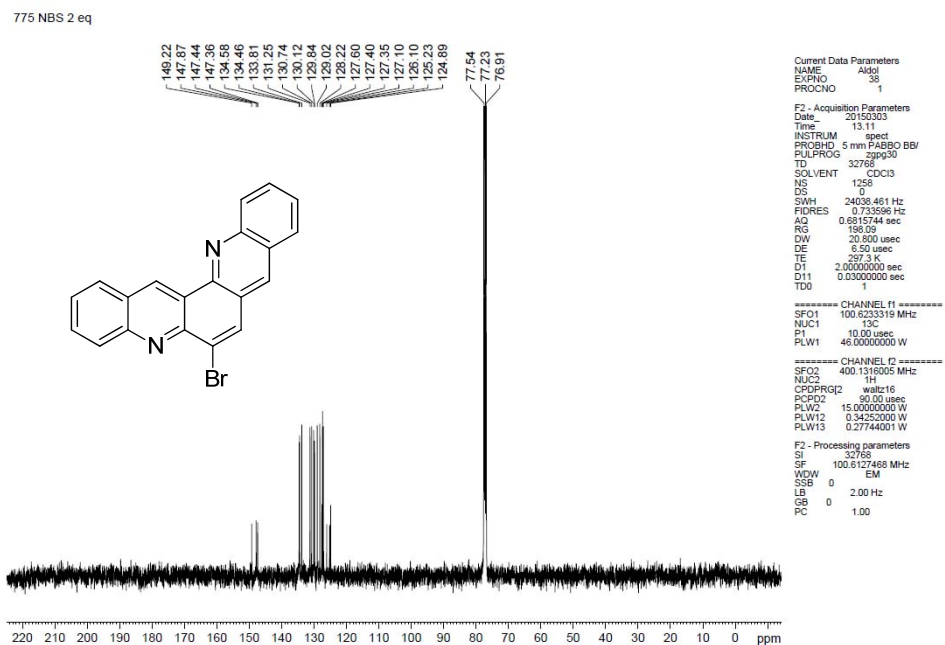

## 6-bromodibenzo[b,j][1,7]phenanthroline (5j) : HRMS

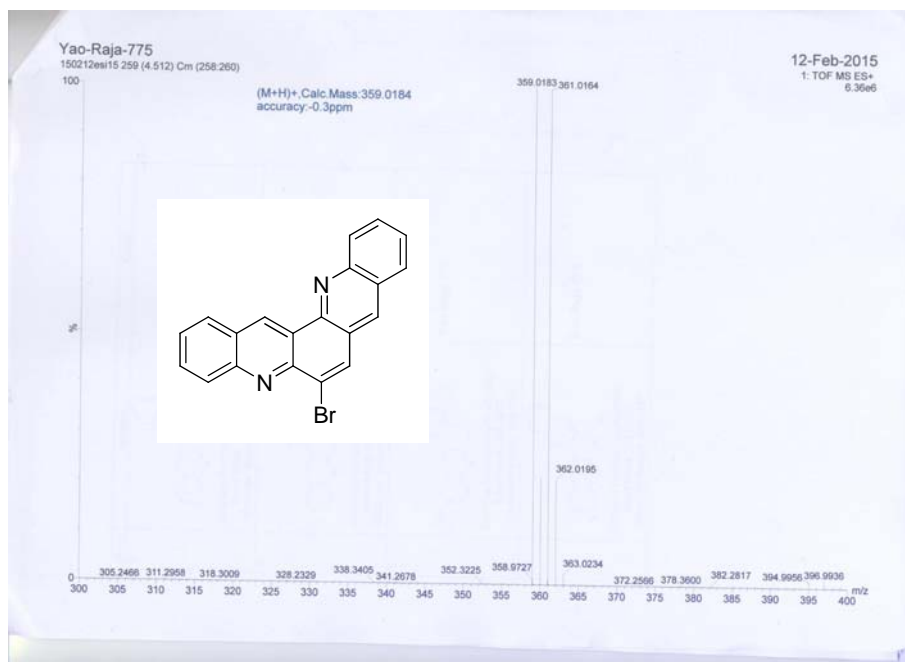

**37. 2-(hydroxy(2-nitrophenyl)methyl)-3,4-dihydroacridin-1(2H)-one (3a) :**  
<sup>1</sup>H NMR (400 MHz, CDCl<sub>3</sub>)

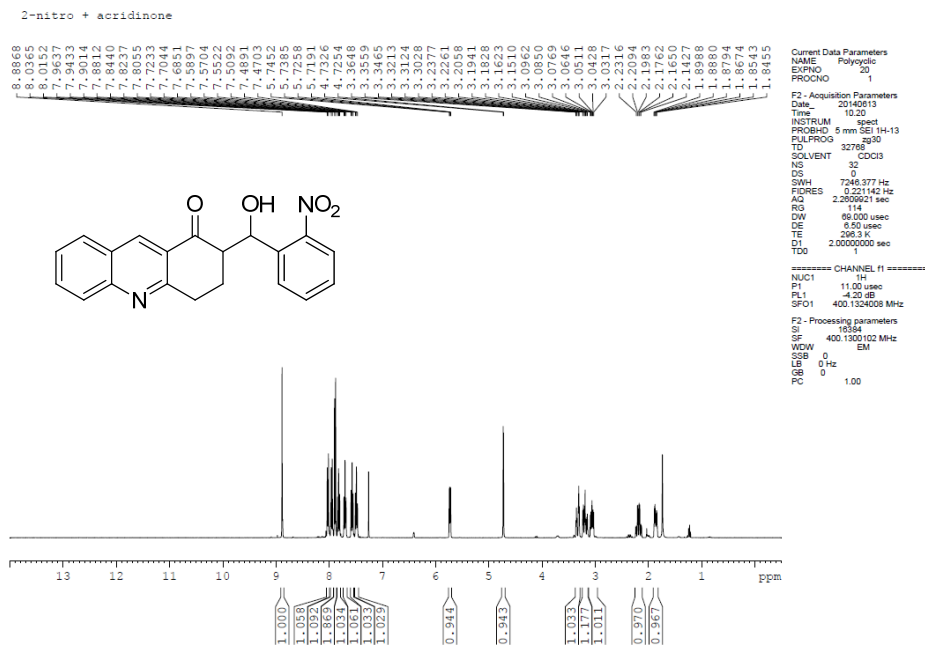

**2-(hydroxy(2-nitrophenyl)methyl)-3,4-dihydroacridin-1(2H)-one (3a) :**  
<sup>13</sup>C NMR (100 MHz, CDCl<sub>3</sub>)

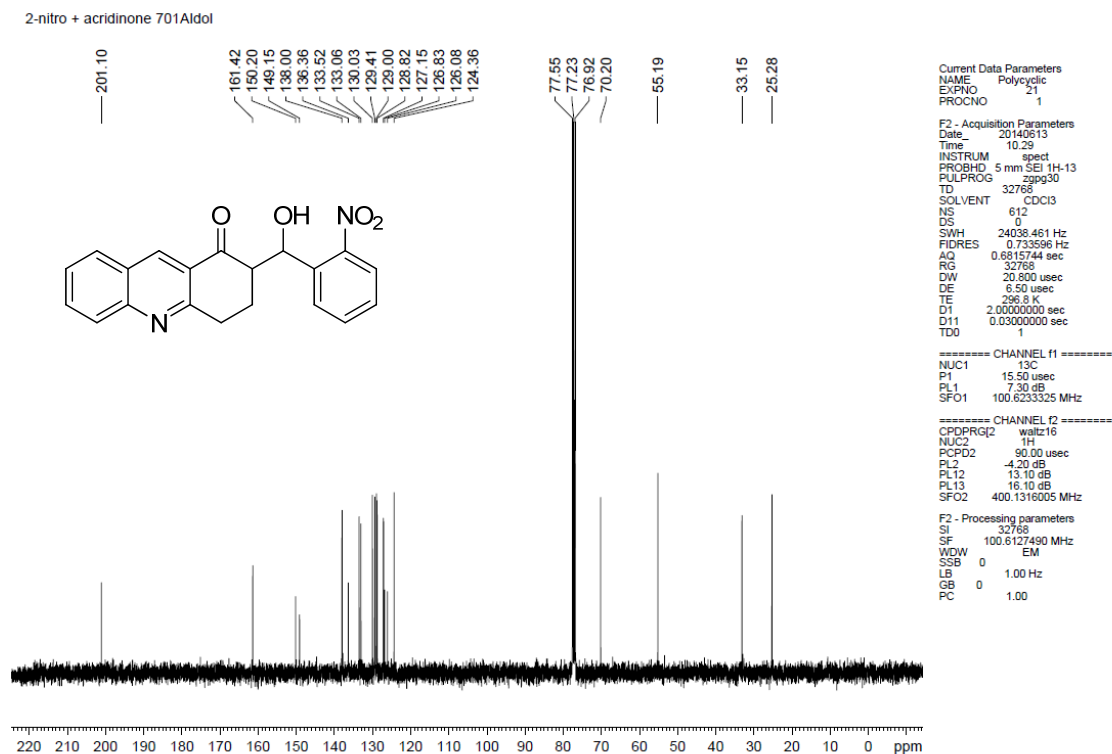

## 2-(hydroxy(2-nitrophenyl)methyl)-3,4-dihydroacridin-1(2H)-one (3a) : HRMS

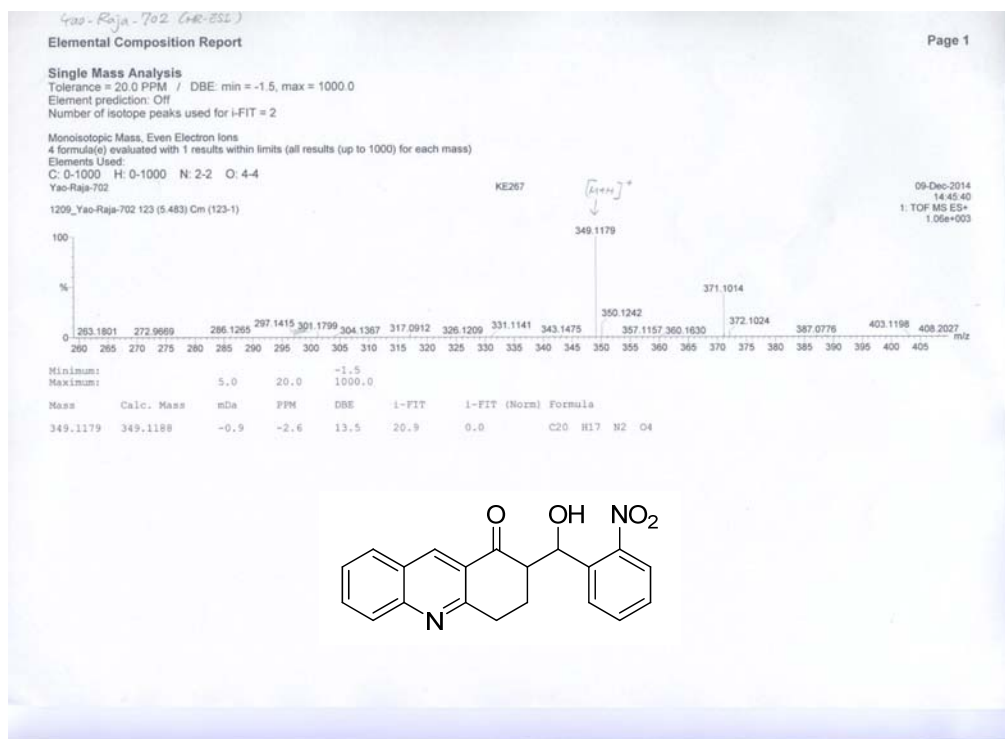

Supplement: c5ra06395g1.pdf [file c5ra06395g1.pdf]
